# Supplementary material for: Genome-Wide Transcriptional Effects of the Anti-Cancer Agent Camptothecin
Source: PubMed Central journal article supplement (PMC3806802; doi:10.1371/journal.pone.0078190), 2013-10-23
Supplement: pone.0078190.s001.pdf [file pone.0078190.s001.pdf]

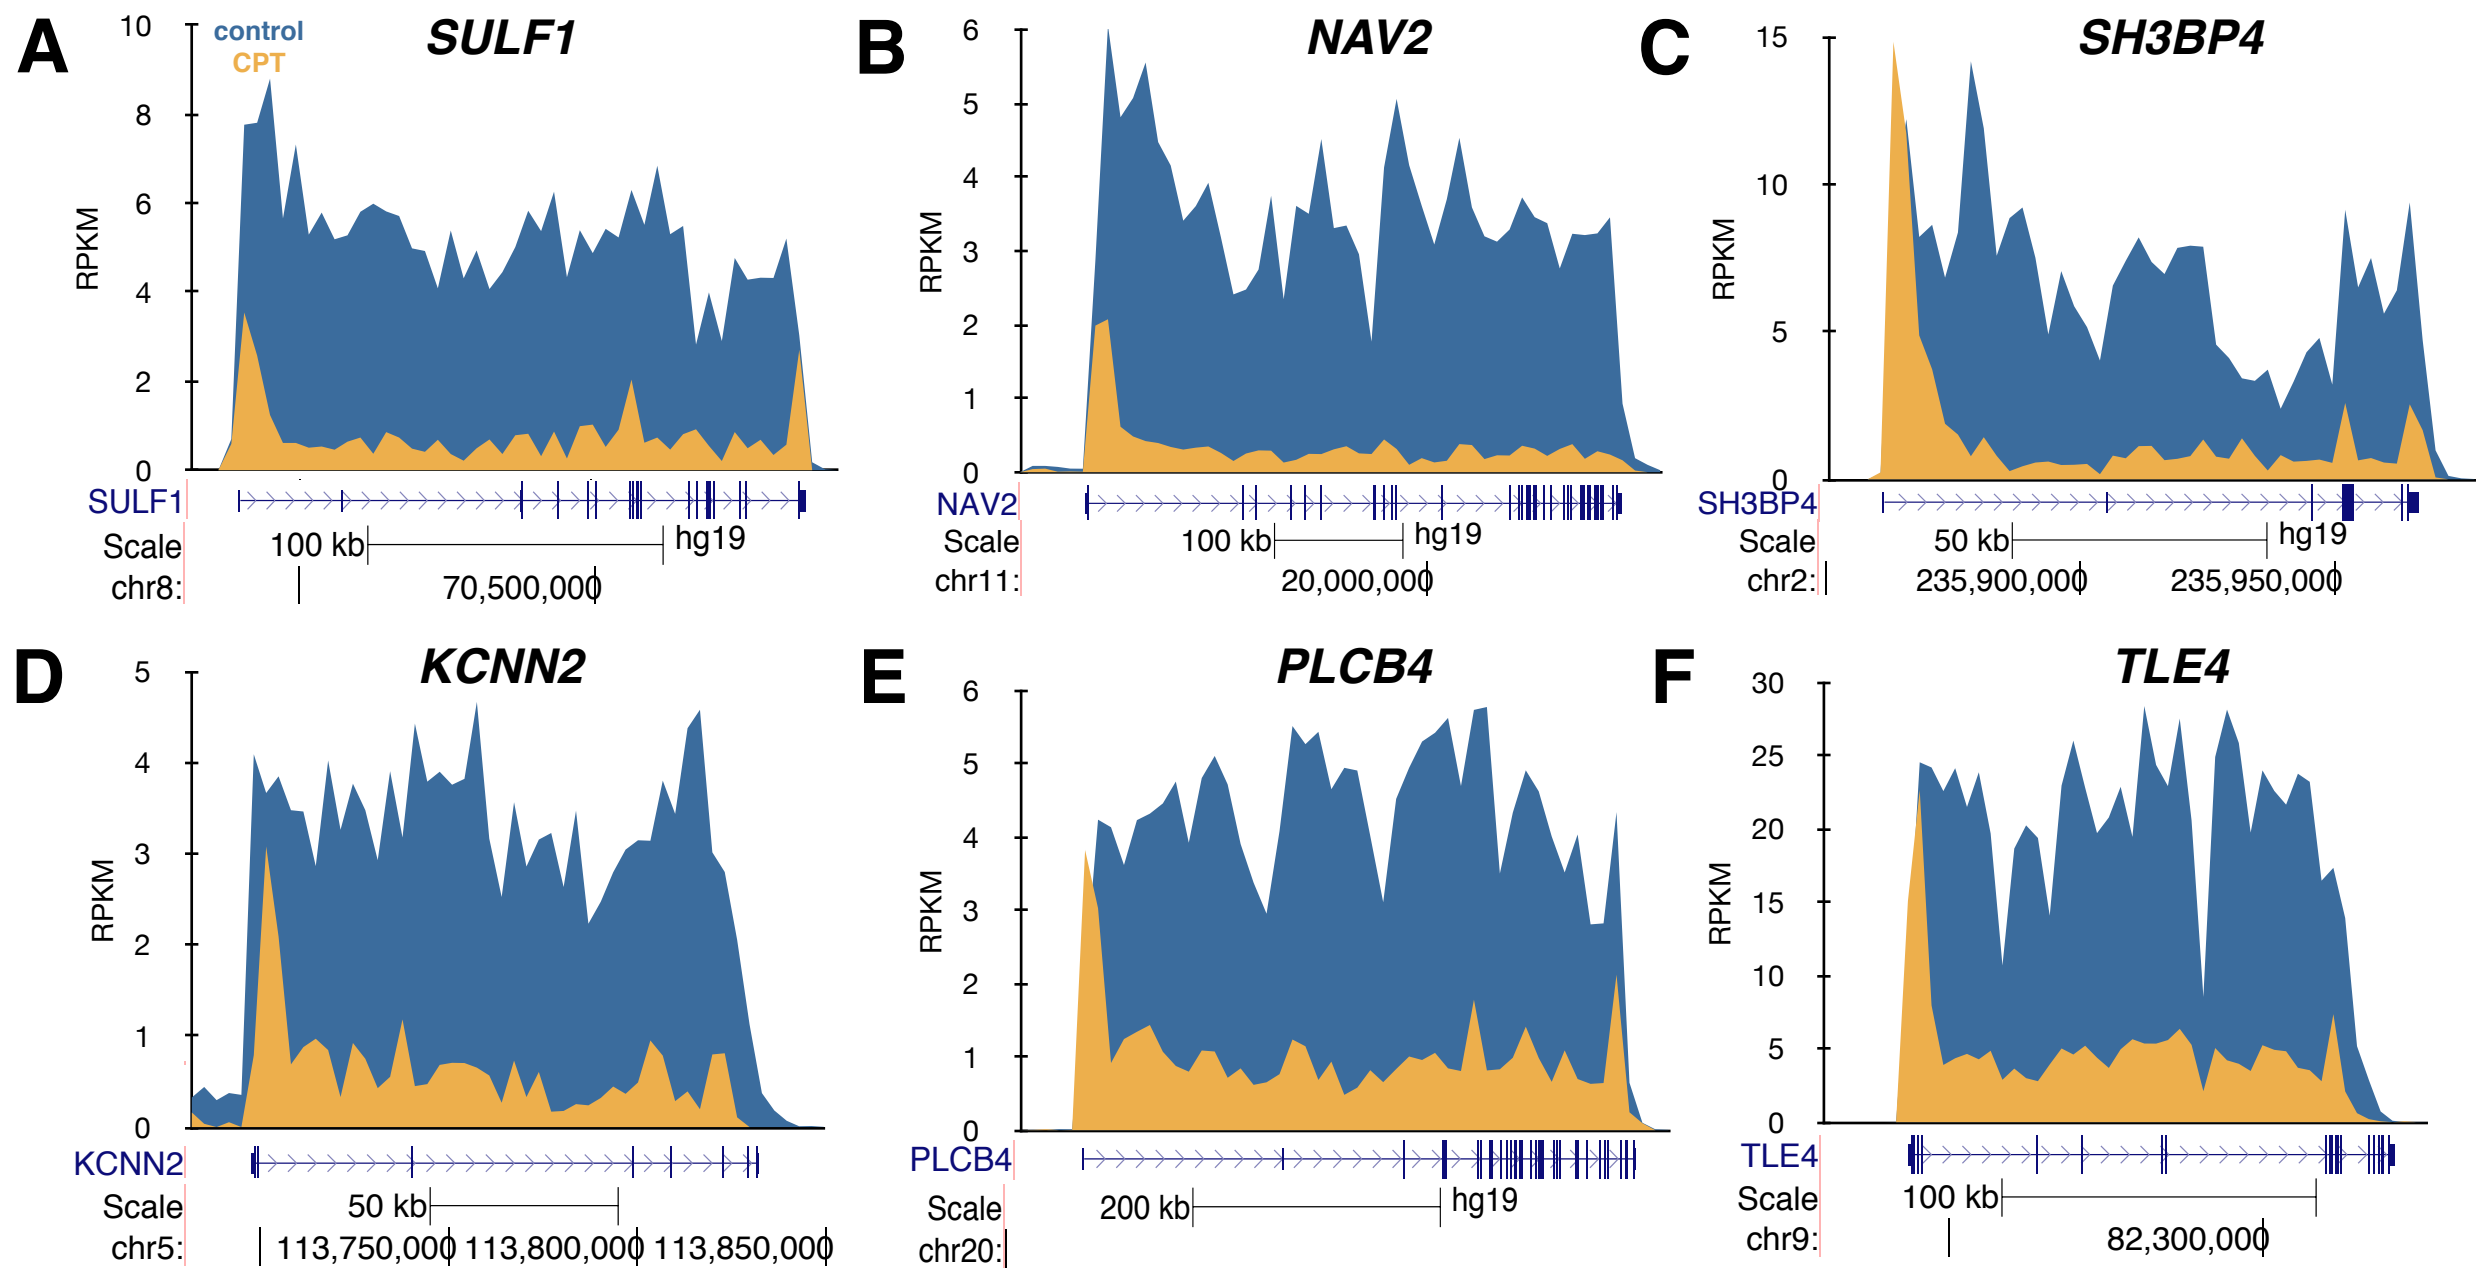

**Figure S1. Large genes inhibited by camptothecin.** (A), *SULF1*, (B), *NAV2*, (C), *SH3BP4*, (D), *KCNN2*, (E), *PLCB4* and (F), *TLE4* genes are showing inhibition of transcription elongation following a 45 min treatment of 20  $\mu$ M camptothecin. Human fibroblast cells were incubated with 2 mM Bru during the last 15 min of camptothecin treatment to label nascent RNA followed by Bru-Seq. The gene maps are from RefSeq Genes (UCSC genome browser).

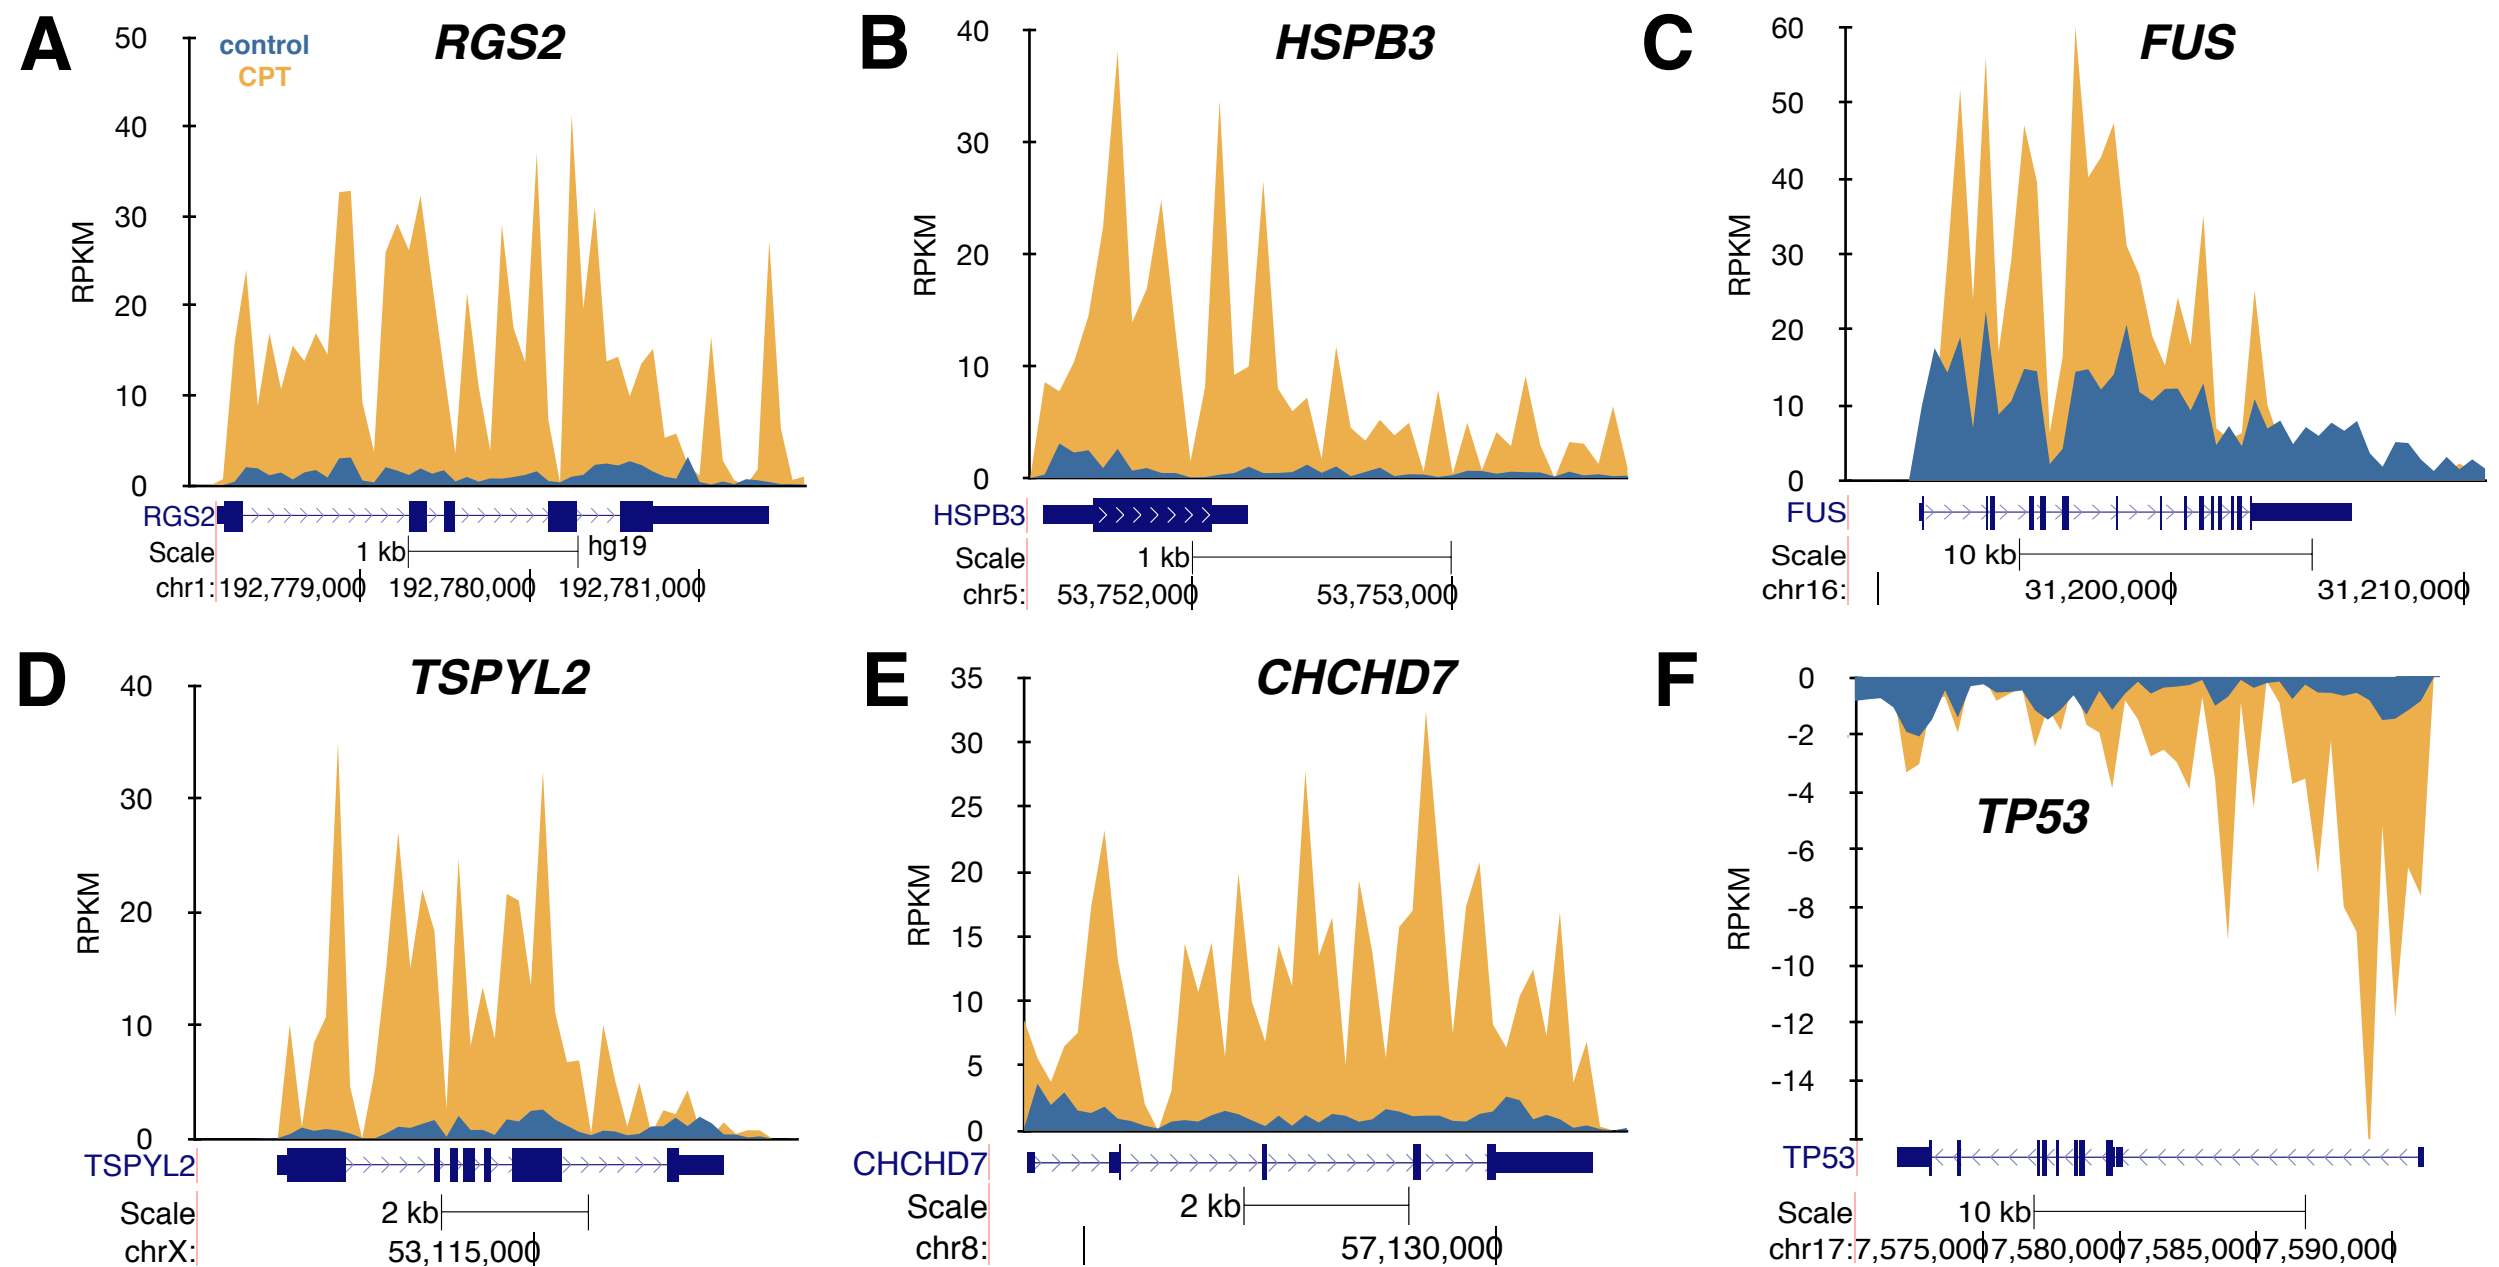

**Figure S2. Examples of small genes showing relative higher transcription reads following camptothecin treatment.** (A), *RGS2*, (B), *HSPB3*, (C), *FUS*, (D), *TSPYL2*, (E), *CHCHD7* and (F), *TP53* represent genes that are upregulated following a 45 min treatment with 20  $\mu$ M camptothecin. Human fibroblast cells were incubated with 2 mM Bru during the last 15 min of camptothecin treatment to label nascent RNA followed by Bru-Seq. The gene maps are from RefSeq Genes (UCSC genome browser).

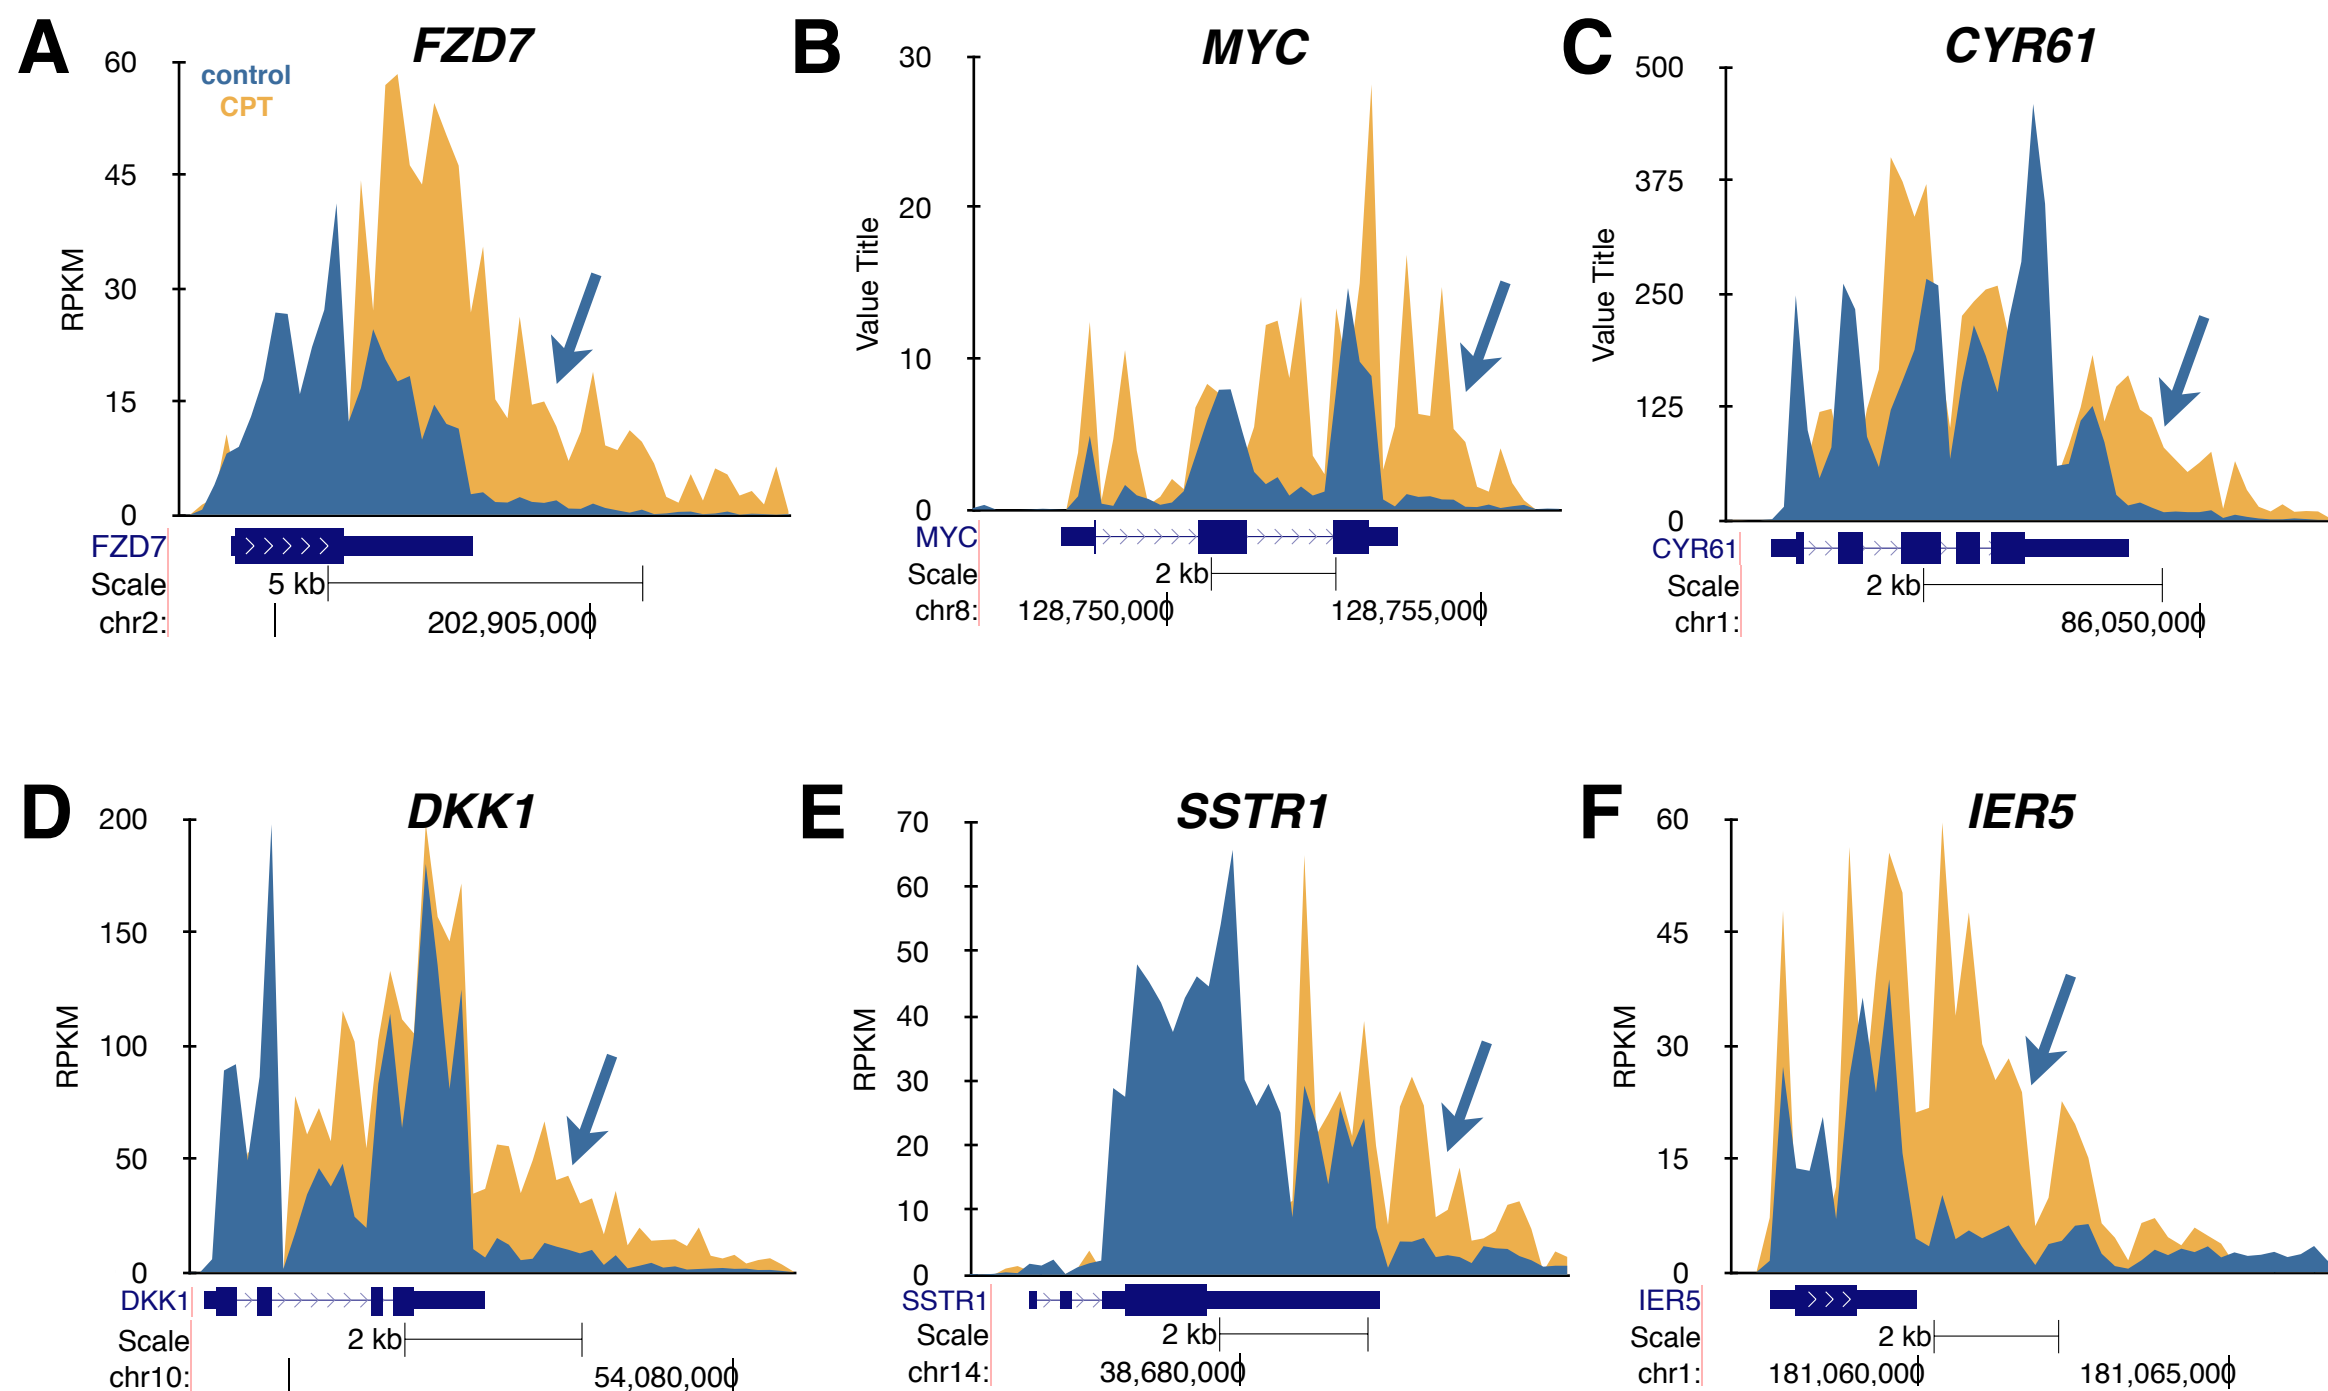

**Figure S3. Increased transcription readthrough past the 3'-end of short genes.** (A), *FZD7*, (B), *MYC*, (C), *CYR61*, (D), *DKK1*, (E), *SSTR1* and (F), *IER5*. Human fibroblast cells were treated with 20  $\mu$ M camptothecin for 45 min and incubated with 2 mM Bru during the last 15 min of camptothecin treatment to label nascent RNA followed by Bru-Seq. The gene maps are from RefSeq Genes (UCSC genome browser).

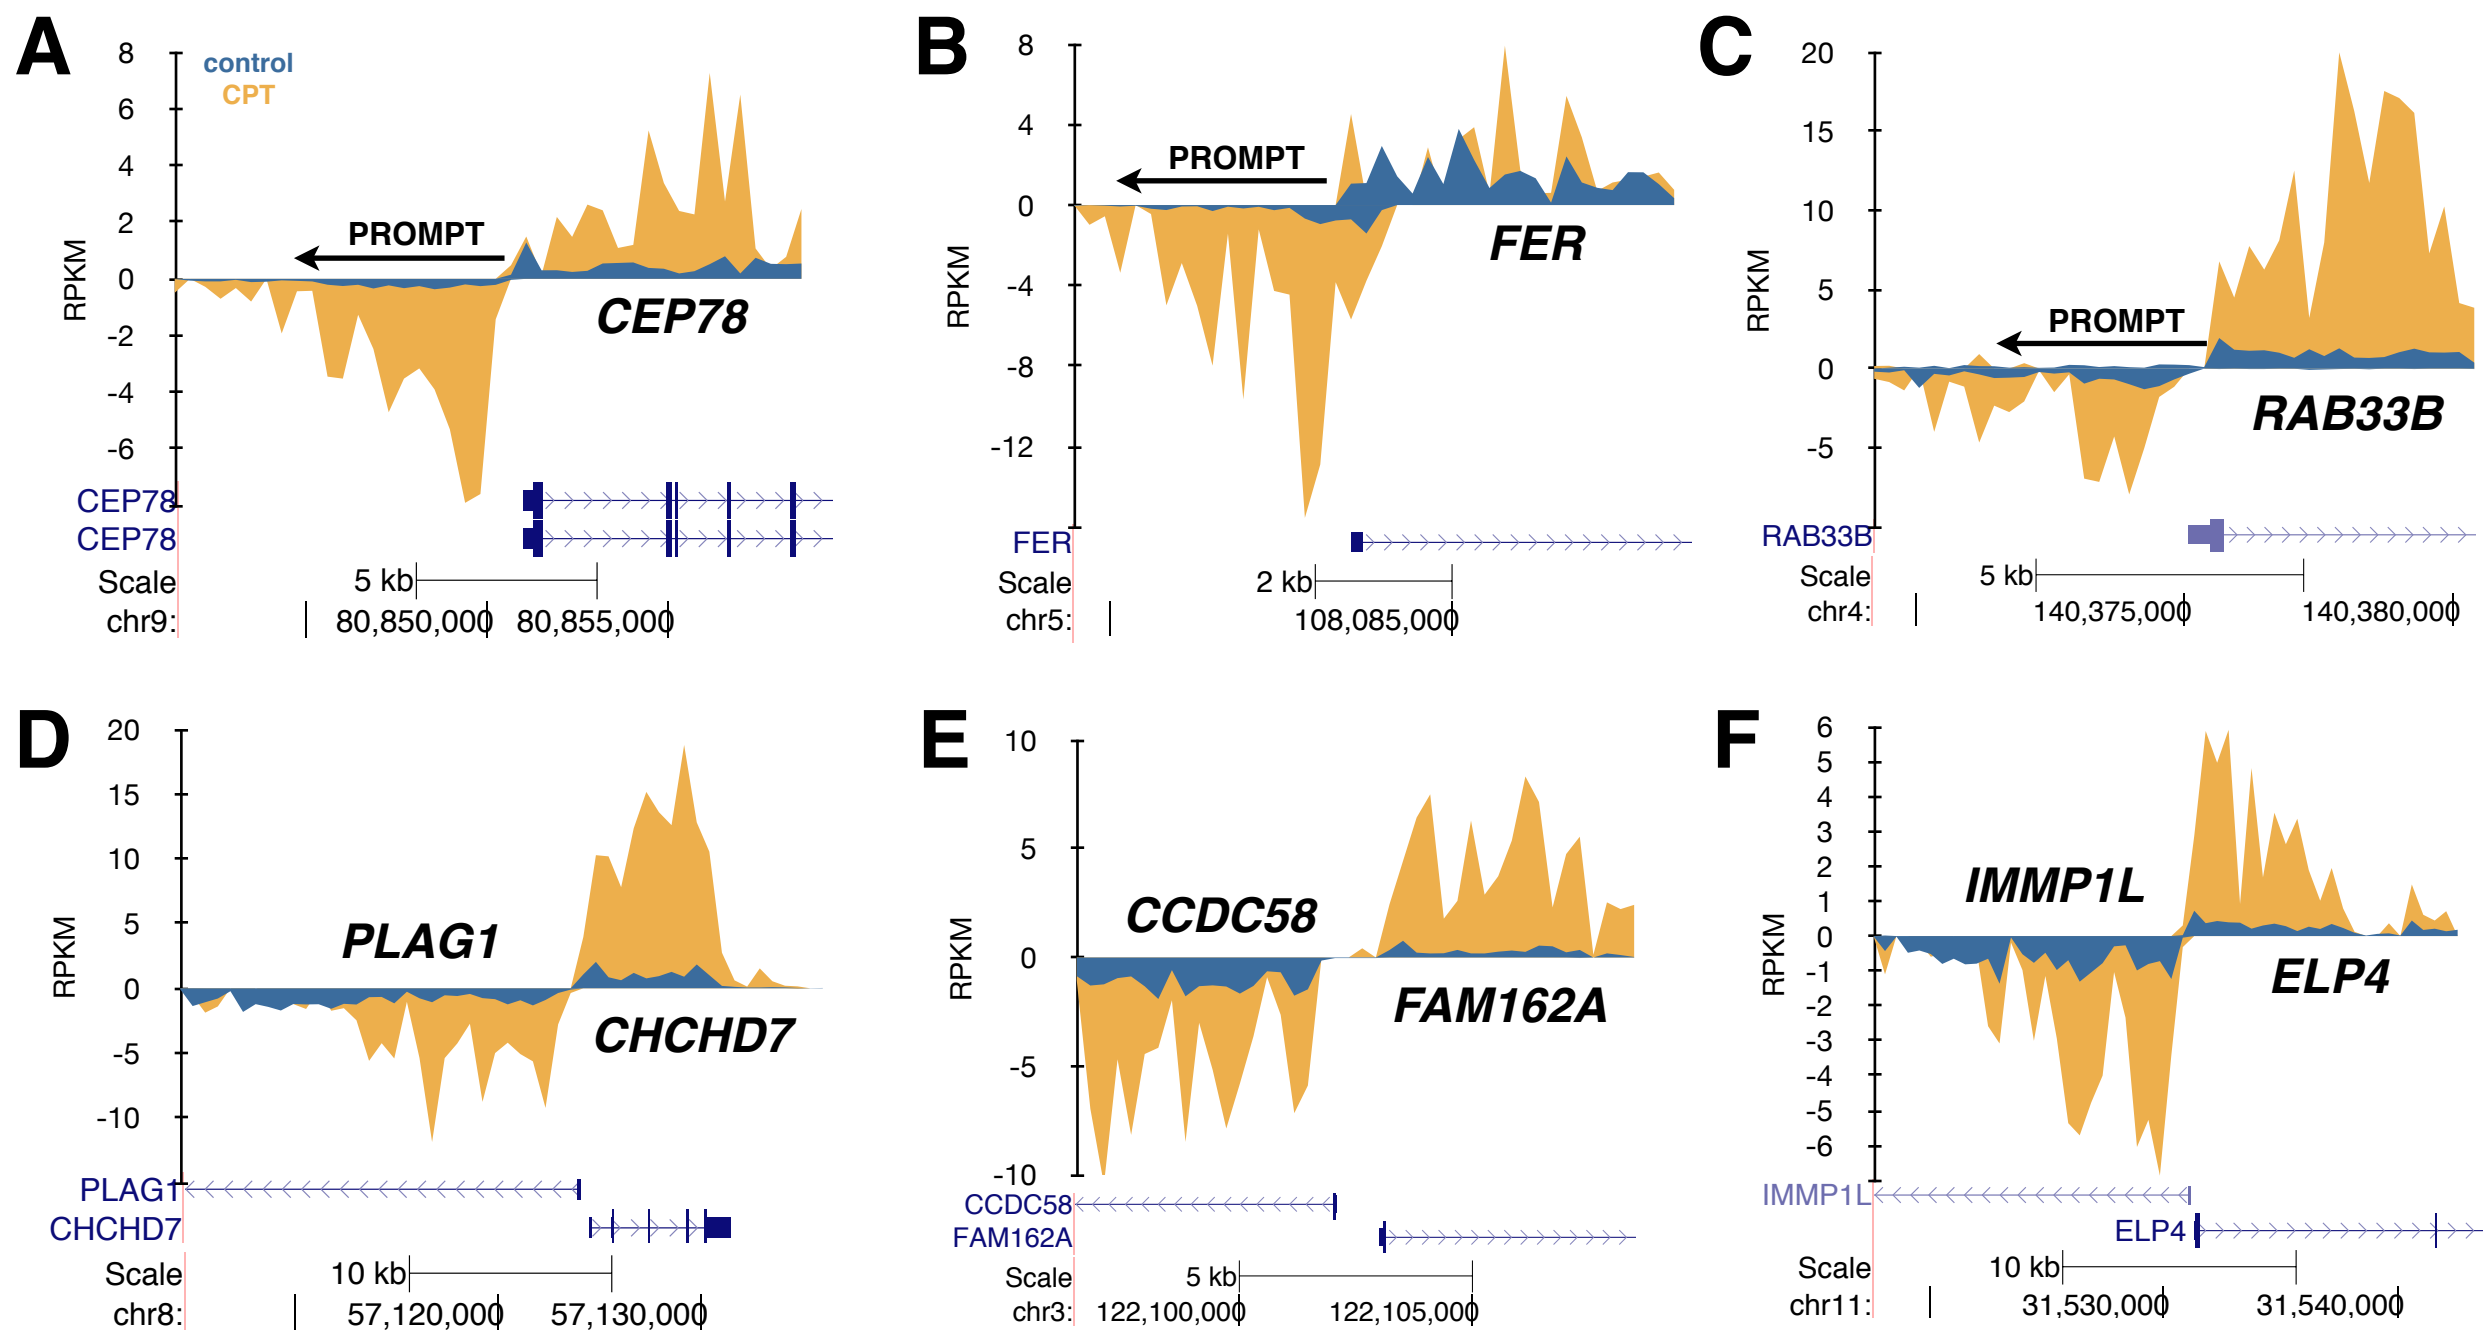

**Figure S4. Effect of camptothecin on divergent upstream transcription.** Camptothecin induces divergent upstream promoter transcription at the (A), *CEP78*, (B), *FER* and (C), *RAB33B* genes and increases divergent gene transcription for the (D), *PLAG1* and *CHCHD7*, (E), *CCDC58* and *FAM162A* and (F), *IMMP1L* and *ELP4* genes. Human fibroblast cells were treated with 20  $\mu$ M camptothecin for 45 min and incubated with 2 mM Bru during the last 15 min of camptothecin treatment to label nascent RNA followed by Bru-Seq. The gene maps are from RefSeq Genes (UCSC genome browser).

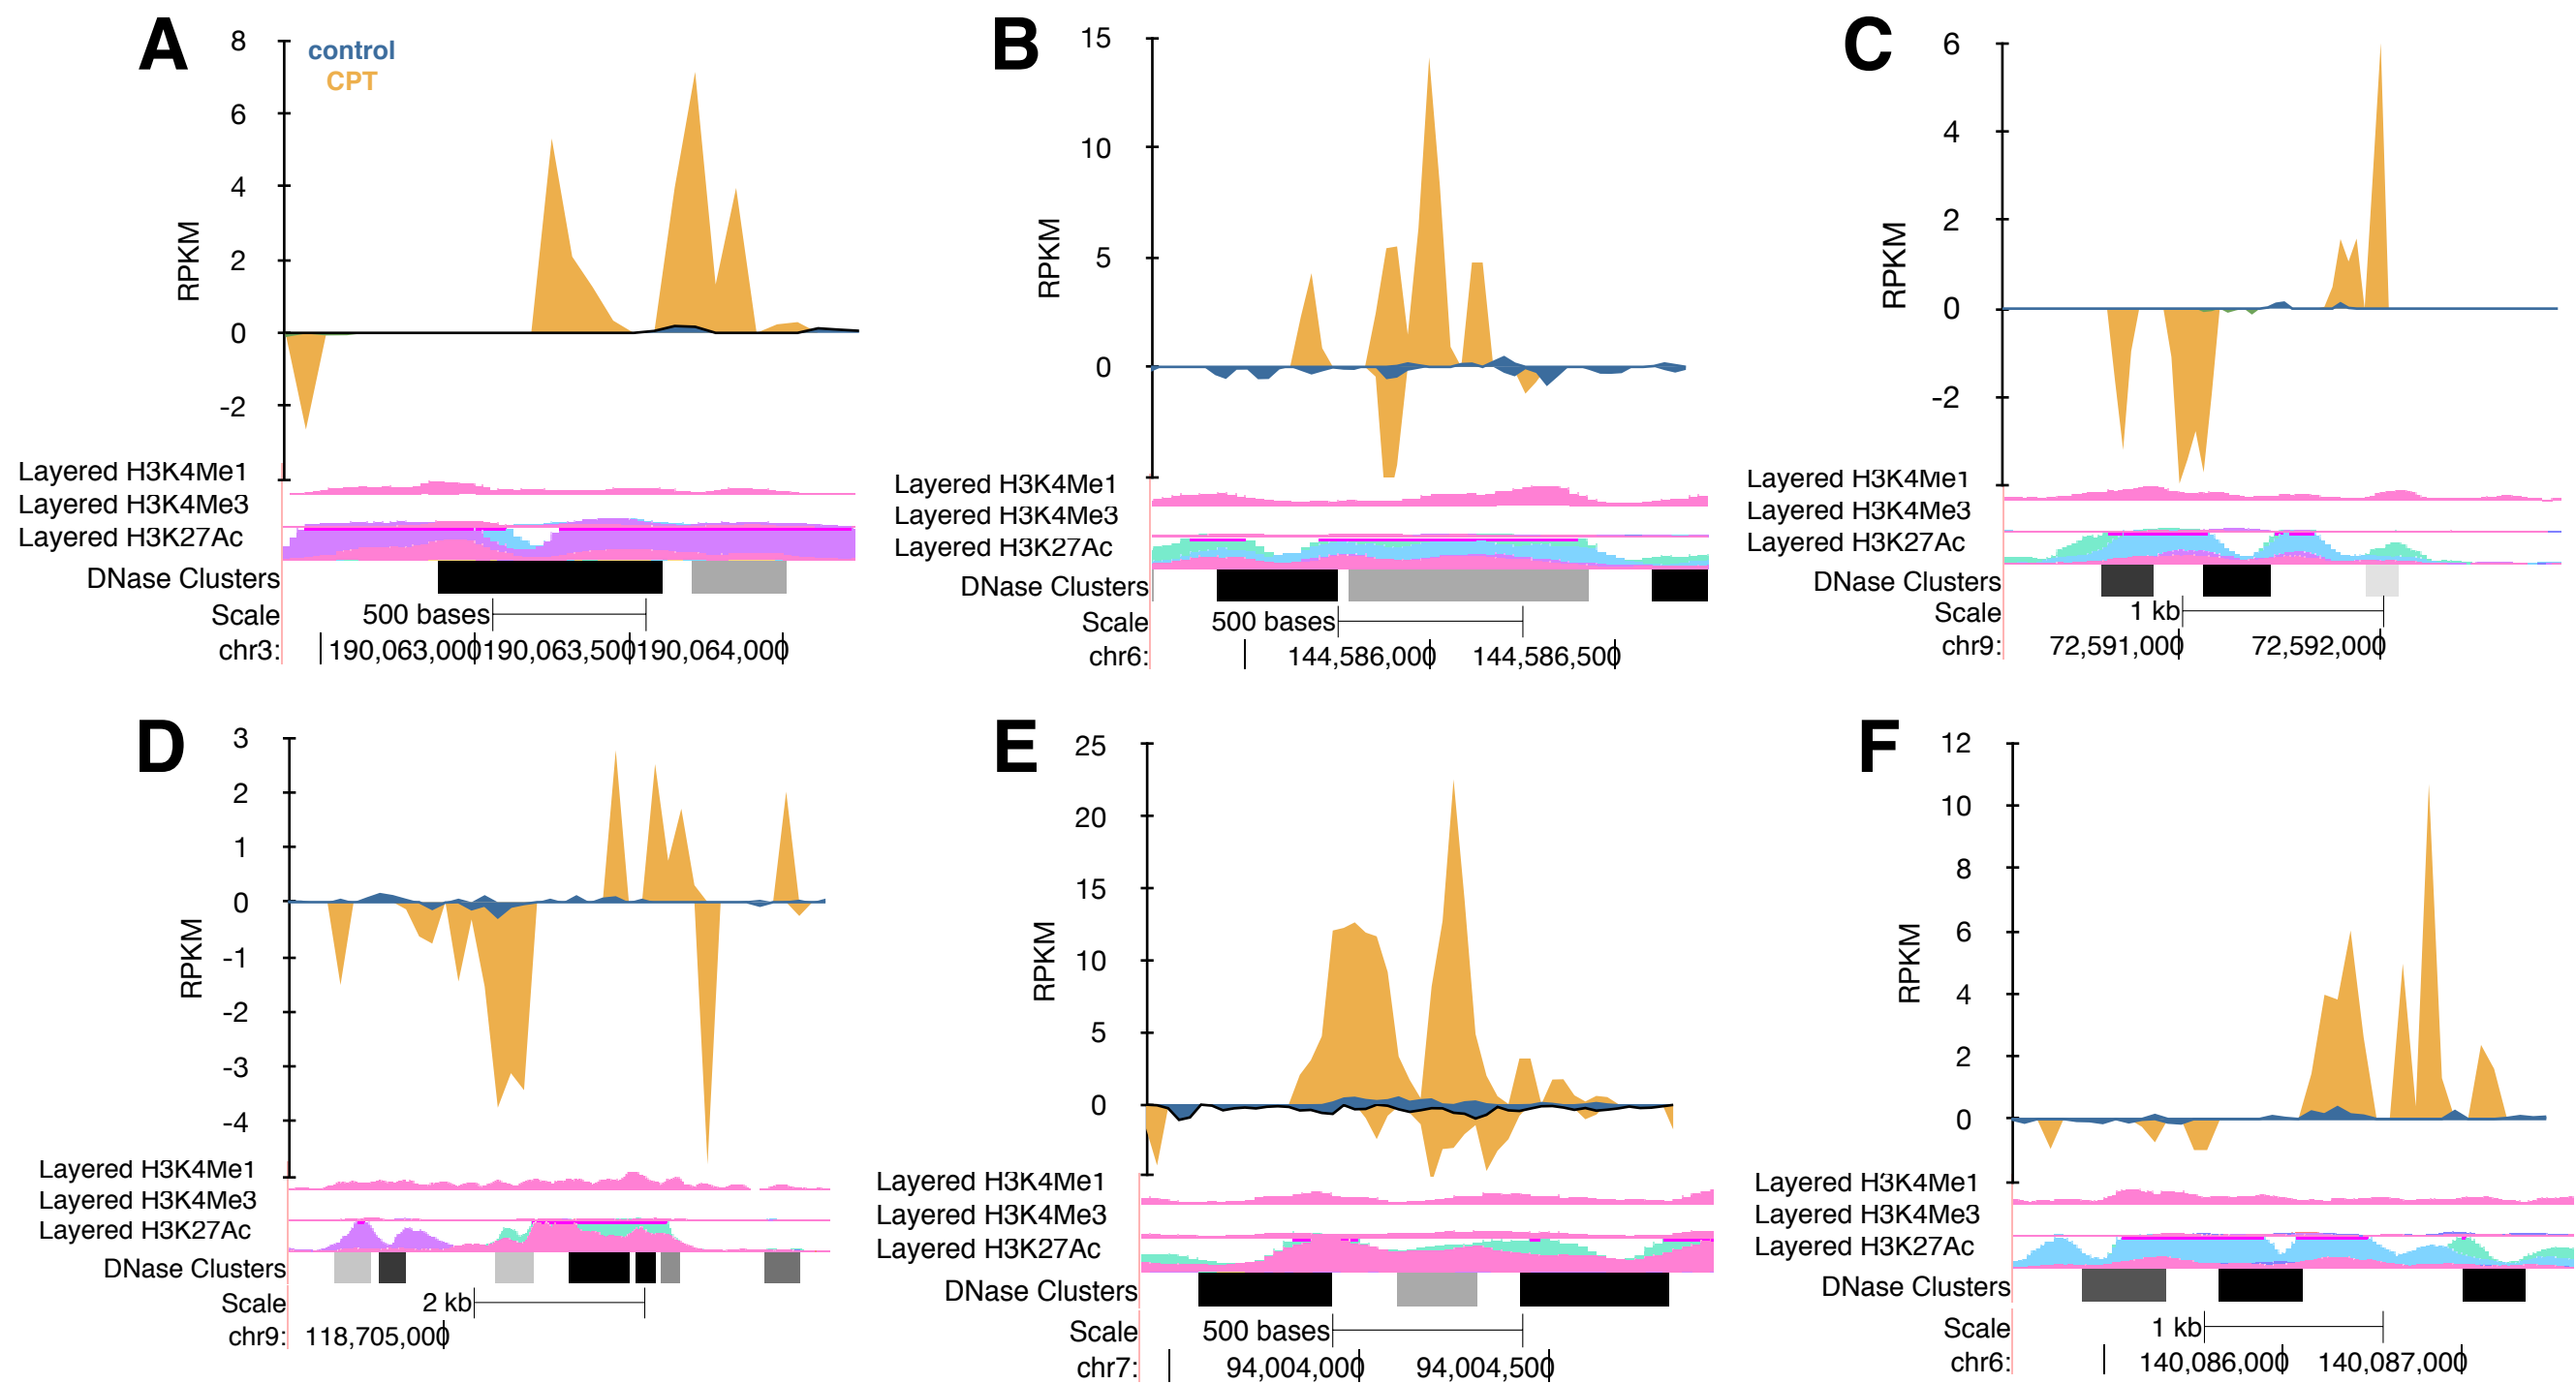

**Figure S5. Effect of camptothecin on putative enhancers defined as regions with high H3K4m1 and H3K27ac while low H3K4m3 histone modifications.** Human fibroblast cells were treated with 20  $\mu$ M camptothecin for 45 min and incubated with 2 mM Bru during the last 15 min of camptothecin treatment to label nascent RNA followed by Bru-Seq. The gene maps, histone mark and DNase hypersensitivity tracks are from ENCODE and RefSeq Genes (UCSC genome browser).

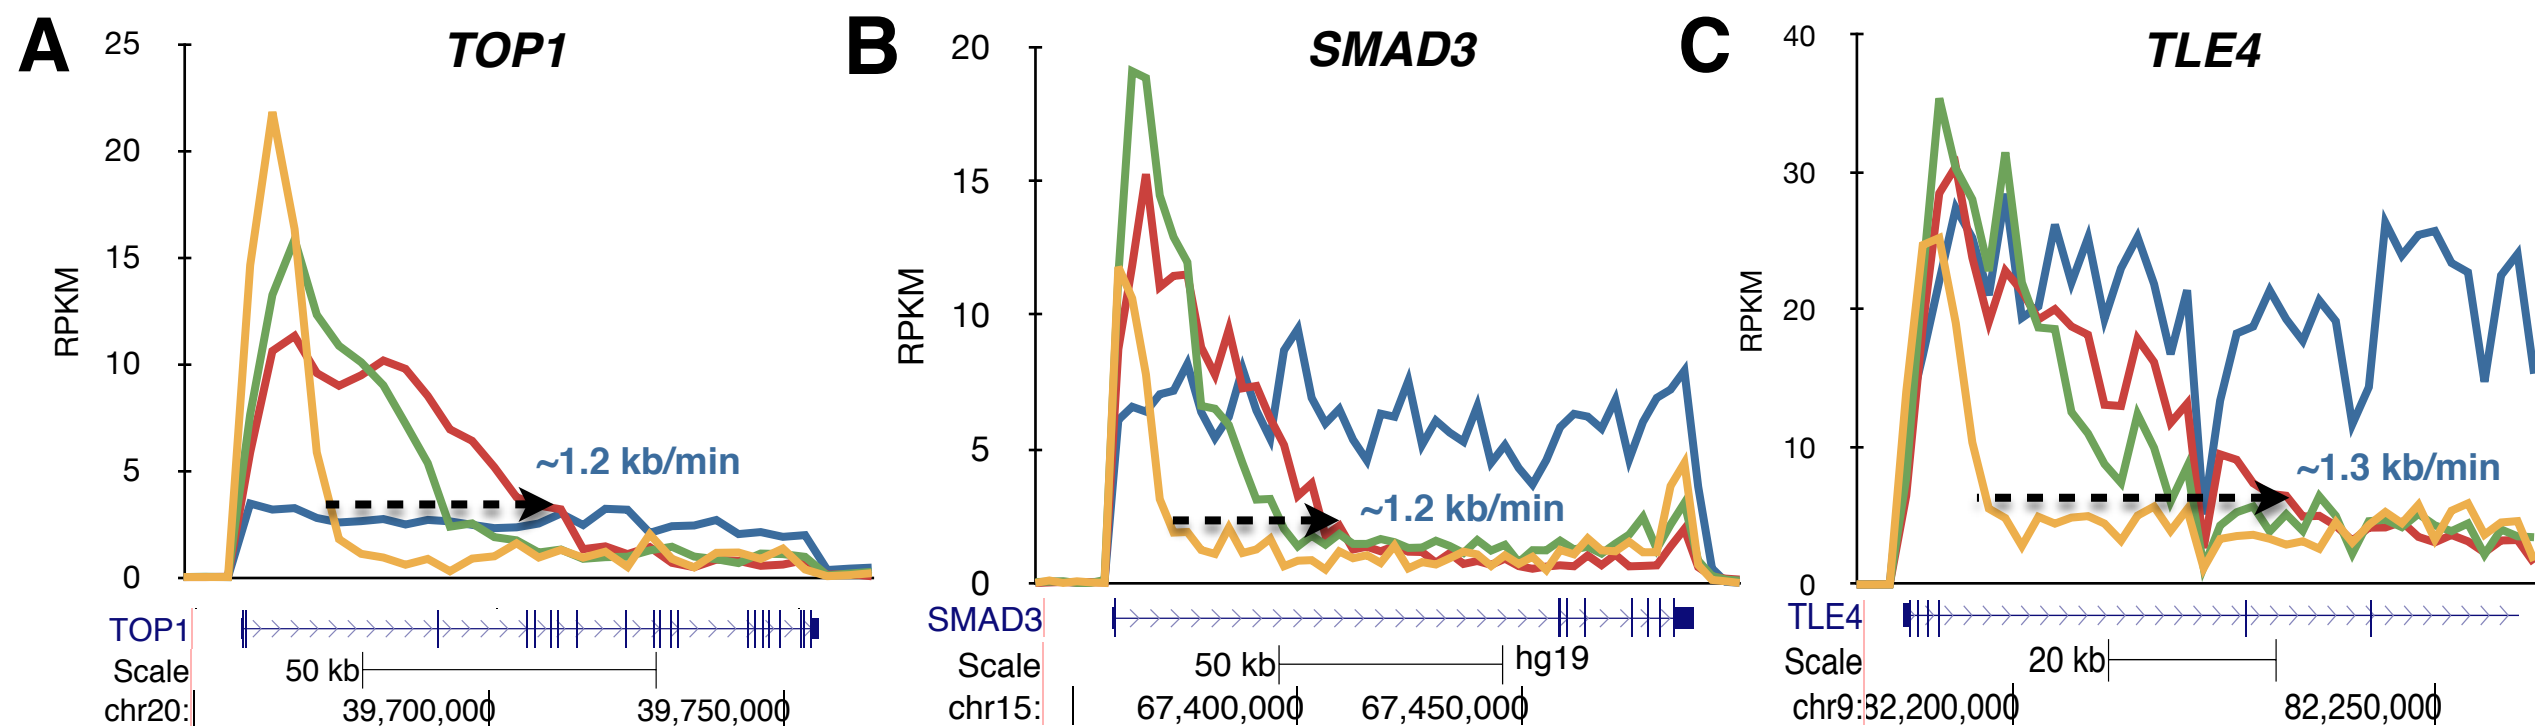

**Figure S6. Effect of camptothecin reversal on RNA synthesis in normal human fibroblasts.** Recovery of RNA synthesis is observed as a wave in a 5' to 3' direction following camptothecin removal with no apparent recovery of RNA polymerases stalled in the body of the genes for the (A) *TOP1*, (B) *SMAD3* and (C) *TLE4* genes. Color key: *Blue*, transcription reads in control cells; *Yellow*, transcription reads from cells labeled with Bru during the last 15 min of a 45 min treatment with camptothecin; *Green*, transcription reads from cells labeled for 15 min with Bru following a wash-out of camptothecin after a 45 min treatment; *Red*, transcription reads from cells labeled with Bru 15 min after drug washout following a 45 min treatment.

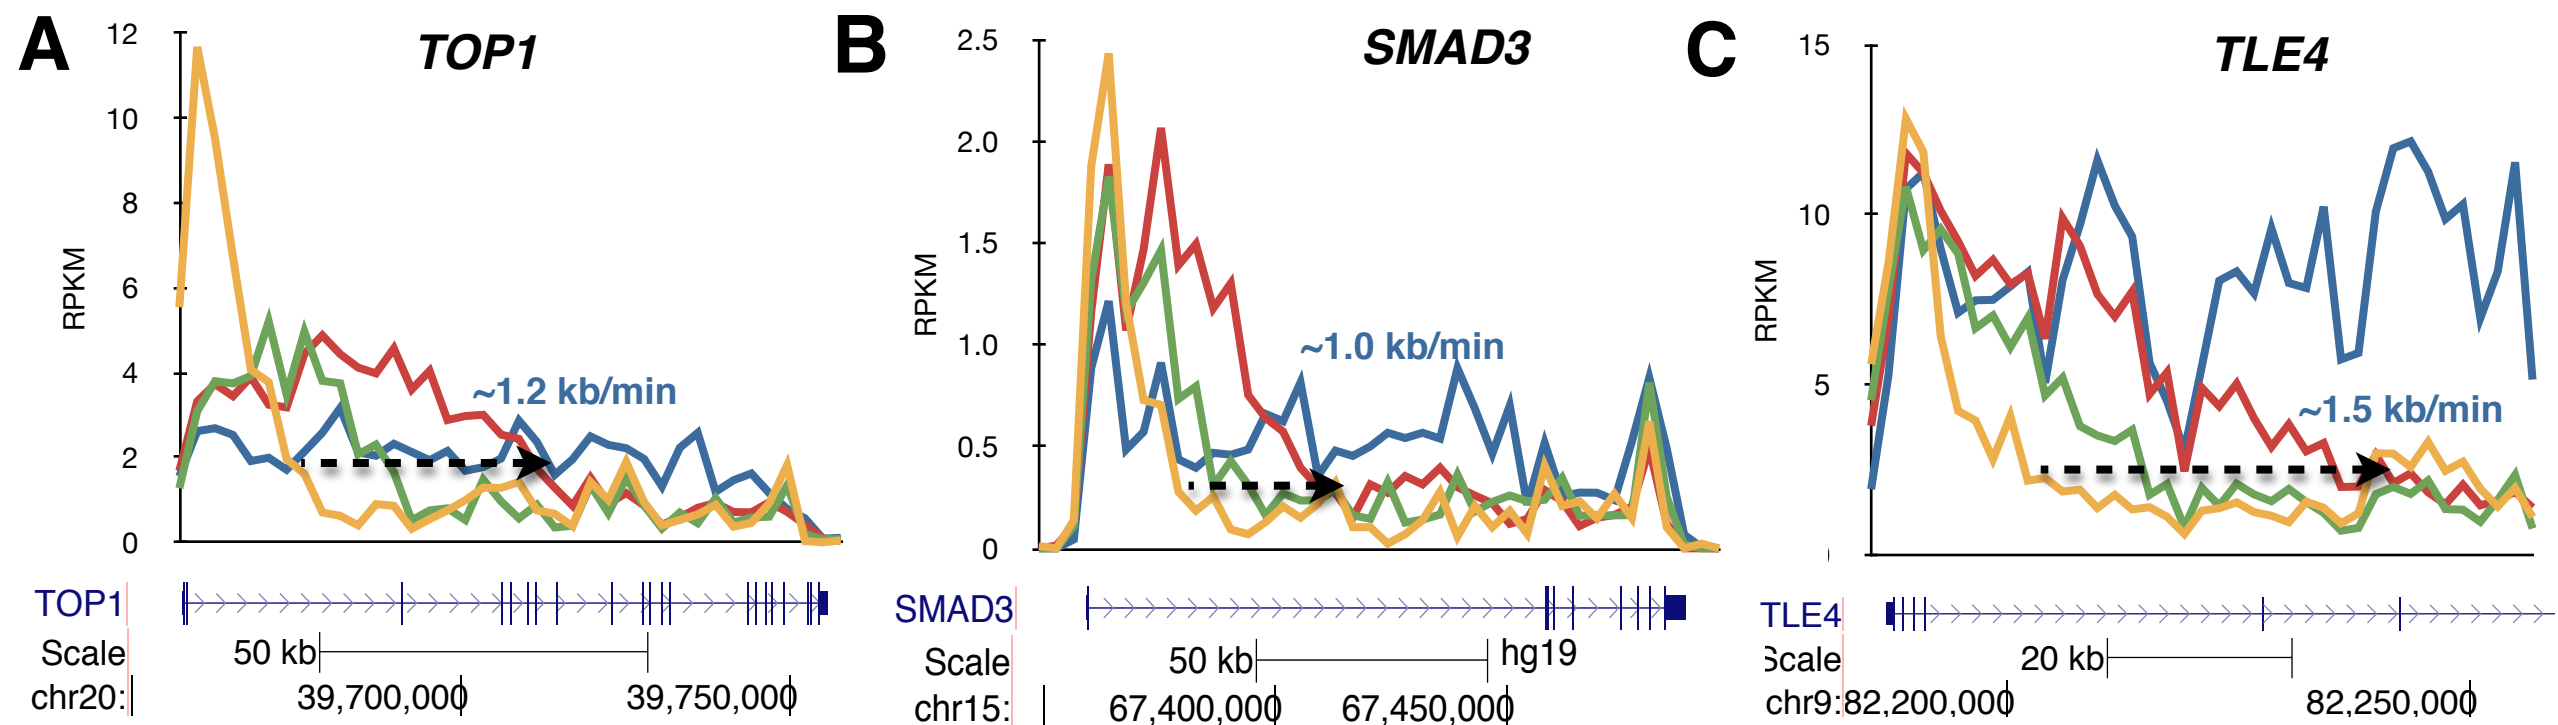

**Figure S7. Effect of camptothecin reversal on RNA synthesis in CS-B fibroblasts.** Recovery of RNA synthesis is observed as a wave in a 5' to 3' direction following camptothecin removal with no apparent recovery of RNA polymerases stalled in the body of the genes for the (A) *TOP1*, (B) *SMAD3* and (C) *TLE4* genes. Color key: *Blue*, transcription reads in control cells; *Yellow*, transcription reads from cells labeled with Bru during the last 15 min of a 45 min treatment with camptothecin; *Green*, transcription reads from cells labeled for 15 min with Bru following a wash-out of camptothecin after a 45 min treatment; *Red*, transcription reads from cells labeled with Bru 15 min after drug washout following a 45 min treatment.



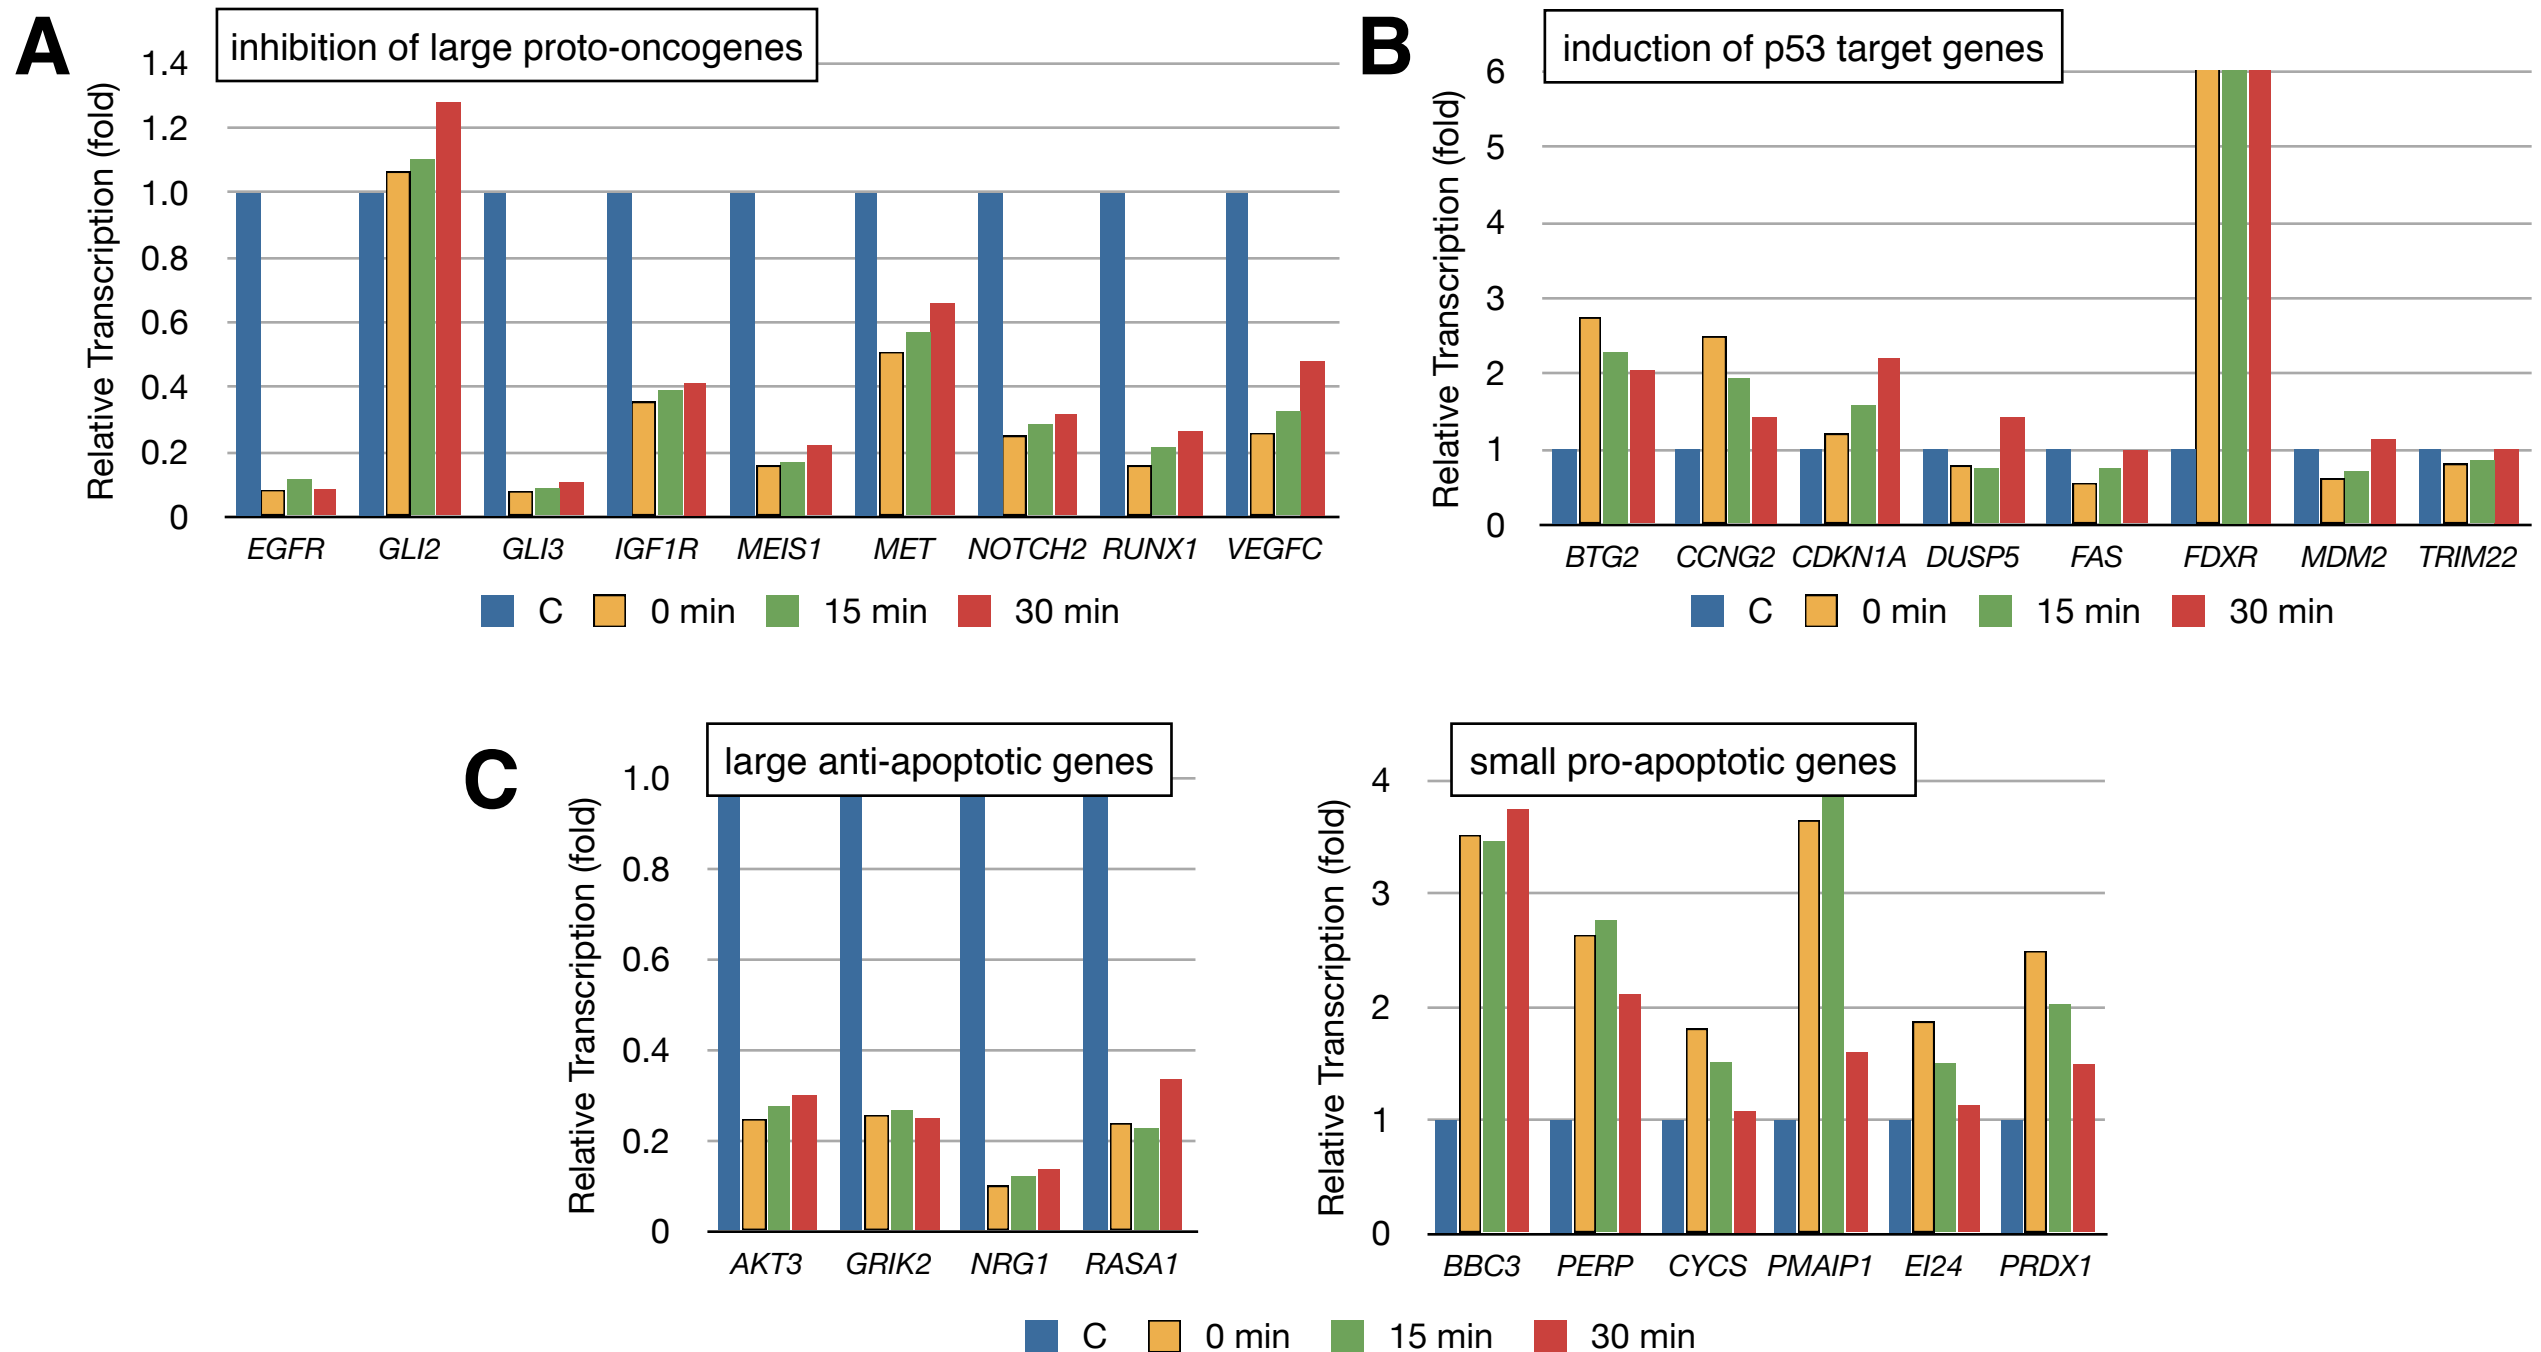

**Figure S8. Effect of camptothecin on the expression of genes shown in Figure 7 in CS-B cells.** (A), large proto-oncogenes inhibited by camptothecin and showing no/slow recovery following drug removal. The *GLI2* gene was unaffected by camptothecin treatment in CS-B cells. (B), p53 target genes where only some were induced in CS-B cells following camptothecin treatment. (C), examples of large anti-apoptotic genes showing reduced relative transcription (left) and examples of small pro-apoptotic genes showing enhanced relative transcription in CS-B cells following camptothecin treatment (right). The data is color coded where blue represents control (C), yellow represents 15 min Bru-labeling at the end of a 45 min camptothecin treatment with no recovery (0 min), green represents drug washout and 15 min Bru-labeling immediately after washout (15 min) and finally red represents labeling 15-30 minutes following washout (30 min).
