# Supplementary material for: Genome-Wide Transcriptional Effects of the Anti-Cancer Agent Camptothecin
Source: PubMed Central journal article supplement (PMC3806802; doi:10.1371/journal.pone.0078190), 2013-10-23
Supplement: pone.0078190.s002.pdf [file pone.0078190.s002.pdf]

**Table S1. Sample statistics.**

| run     | sample      | type                 | mergedSamples   | refSeq | stranded | readCount   | mappedReadCount | exon_antisense | intron_antisense | intron_sense | exon_sense | ambiguous |
|---------|-------------|----------------------|-----------------|--------|----------|-------------|-----------------|----------------|------------------|--------------|------------|-----------|
| na      | nf0h3a_3b_4 | control              | nf0h3a nf0h3b r | hg19   | TRUE     | 171,506,190 | 123,034,811     | 476,506        | 1,615,418        | 91,749,430   | 12,825,991 | 1,847,871 |
| Run_428 | nfCPT0m1    | CPT, 0 min recovery  |                 | hg19   | TRUE     | 84,691,817  | 31,543,500      | 131,423        | 523,972          | 19,443,380   | 5,755,274  | 459,586   |
| Run_428 | nfCPT15m1   | CPT, 15 min recovery |                 | hg19   | TRUE     | 76,799,699  | 40,634,943      | 208,254        | 652,892          | 28,959,558   | 5,026,714  | 638,214   |
| Run_428 | nfCPT30m1   | CPT, 30 min recovery |                 | hg19   | TRUE     | 59,058,448  | 36,041,496      | 173,590        | 595,106          | 26,381,015   | 3,854,165  | 564,355   |
