# Supplementary material for: Genome-Wide Transcriptional Effects of the Anti-Cancer Agent Camptothecin
Source: PubMed Central journal article supplement (PMC3806802; doi:10.1371/journal.pone.0078190), 2013-10-23
Supplement: pone.0078190.s003.pdf [file pone.0078190.s003.pdf]

**Table S2. Up and down regulation of genes following CPT treatment.**

Pages 1-14: Table S2A - UP-regulated genes

Pages 15-31: Table S2B - DOWN-regulated genes

**Table S2A. Genes UP-regulated >2-fold following 45 min CPT treatment (CPT).**

| chrom | start     | end       | name                | strand | bp    | meanRPKM | meanCount | 1_CPT  | 2_cont | foldChange | log2FoldChange | Adjusted | significant |
|-------|-----------|-----------|---------------------|--------|-------|----------|-----------|--------|--------|------------|----------------|----------|-------------|
| chr10 | 28966423  | 28971868  | <b>BAMBI</b>        | +      | 5445  | 1.366    | 217       | 665    | 68     | 9.686      | 3.276          | 0        | 1           |
| chr1  | 192778168 | 192781407 | <b>RG52</b>         | +      | 3239  | 5.122    | 482       | 1404   | 175    | 8.002      | 3              | 0        | 1           |
| chr6  | 31783290  | 31785719  | <b>HSPA1A</b>       | +      | 2429  | 1.145    | 82        | 228    | 33     | 6.833      | 2.773          | 0.002    | 1           |
| chrX  | 53111541  | 53117728  | <b>TSPYL2</b>       | +      | 6187  | 3.474    | 628       | 1747   | 255    | 6.826      | 2.771          | 0        | 1           |
| chr8  | 57124314  | 57131176  | <b>CHCHD7</b>       | +      | 6862  | 4.007    | 808       | 2217   | 338    | 6.542      | 2.71           | 0        | 1           |
| chr17 | 6544221   | 6547861   | <b>TXNDC17</b>      | +      | 3640  | 2.371    | 255       | 690    | 110    | 6.248      | 2.643          | 0        | 1           |
| chr7  | 112756772 | 112758637 | <b>LOC401397</b>    | +      | 1865  | 1.777    | 98        | 260    | 44     | 5.904      | 2.562          | 0.003    | 1           |
| chr5  | 53751430  | 53752214  | <b>HSPB3</b>        | -      | 784   | 4.354    | 100       | 265    | 45     | 5.876      | 2.555          | 0.004    | 1           |
| chr11 | 65265232  | 65273939  | <b>MALAT1</b>       | +      | 8707  | 1086.901 | 281937    | 735903 | 130616 | 5.634      | 2.494          | 0.247    | 0           |
| chr13 | 77566058  | 77576652  | <b>CLN5</b>         | +      | 10594 | 2.078    | 652       | 1696   | 304    | 5.578      | 2.48           | 0        | 1           |
| chrX  | 37698088  | 37706889  | <b>DYNLT3</b>       | -      | 8801  | 1.657    | 435       | 1126   | 205    | 5.477      | 2.453          | 0        | 1           |
| chrX  | 74960372  | 74962914  | <b>TCP3P1</b>       | -      | 2542  | 1.497    | 114       | 292    | 54     | 5.363      | 2.423          | 0.004    | 1           |
| chr11 | 62432778  | 62434923  | <b>METTL12</b>      | +      | 2145  | 3.337    | 211       | 541    | 102    | 5.305      | 2.407          | 0.002    | 1           |
| chr18 | 57567191  | 57571538  | <b>PMAIP1</b>       | +      | 4347  | 5.3      | 676       | 1717   | 329    | 5.207      | 2.381          | 0        | 1           |
| chr13 | 27844463  | 27847827  | <b>RASL11A</b>      | +      | 3364  | 2.705    | 268       | 679    | 131    | 5.181      | 2.373          | 0.002    | 1           |
| chr9  | 79000432  | 79009444  | <b>RFK</b>          | -      | 9012  | 1.519    | 406       | 1028   | 198    | 5.177      | 2.372          | 0.001    | 1           |
| chr18 | 47007547  | 47013644  | <b>C18orf32</b>     | -      | 6097  | 2.786    | 505       | 1280   | 247    | 5.171      | 2.37           | 0.001    | 1           |
| chr7  | 142960521 | 142966222 | <b>GSTK1</b>        | +      | 5701  | 2.214    | 373       | 946    | 182    | 5.171      | 2.37           | 0.001    | 1           |
| chr17 | 78109012  | 78120982  | <b>EIF4A3</b>       | -      | 11970 | 5.978    | 2119      | 5350   | 1043   | 5.129      | 2.359          | 0        | 1           |
| chr19 | 40928408  | 40931932  | <b>SERTAD1</b>      | -      | 3524  | 8.04     | 833       | 2102   | 410    | 5.115      | 2.355          | 0        | 1           |
| chr6  | 97337186  | 97345767  | <b>NDUFAF4</b>      | -      | 8581  | 1.458    | 373       | 939    | 184    | 5.077      | 2.344          | 0.001    | 1           |
| chr12 | 120881763 | 120884215 | <b>TRIAP1</b>       | -      | 2452  | 3.526    | 256       | 644    | 127    | 5.068      | 2.341          | 0.002    | 1           |
| chr9  | 91605777  | 91611057  | <b>C9orf47</b>      | +      | 5280  | 2.798    | 438       | 1099   | 218    | 5.03       | 2.33           | 0.001    | 1           |
| chr6  | 30312905  | 30314635  | <b>RPP21</b>        | +      | 1730  | 1.951    | 99        | 248    | 50     | 4.945      | 2.306          | 0.009    | 1           |
| chr2  | 131095815 | 131099922 | <b>CCDC115</b>      | -      | 4107  | 1.084    | 131       | 326    | 66     | 4.892      | 2.29           | 0.007    | 1           |
| chr17 | 72858618  | 72869156  | <b>FDXR</b>         | -      | 10538 | 1.797    | 559       | 1387   | 283    | 4.887      | 2.289          | 0.001    | 1           |
| chr1  | 110276553 | 110283660 | <b>GSTM3</b>        | -      | 7107  | 2.252    | 479       | 1186   | 244    | 4.86       | 2.281          | 0.001    | 1           |
| chr2  | 36581891  | 36582713  | <b>LOC100288911</b> | -      | 822   | 3.047    | 73        | 182    | 37     | 4.847      | 2.277          | 0.015    | 1           |
| chr2  | 220094478 | 220101391 | <b>ANKZF1</b>       | +      | 6913  | 1.85     | 378       | 935    | 193    | 4.838      | 2.274          | 0.002    | 1           |
| chrX  | 102883647 | 102885876 | <b>TCEAL1</b>       | +      | 2229  | 2.098    | 140       | 344    | 72     | 4.736      | 2.244          | 0.006    | 1           |
| chr14 | 31915242  | 31926680  | <b>C14orf126</b>    | -      | 11438 | 1.342    | 461       | 1129   | 238    | 4.735      | 2.243          | 0.001    | 1           |
| chr17 | 40009798  | 40021629  | <b>KLHL11</b>       | -      | 11831 | 1.472    | 517       | 1266   | 268    | 4.726      | 2.241          | 0.001    | 1           |
| chr2  | 46844324  | 46852881  | <b>CRIP1</b>        | +      | 8557  | 2.111    | 542       | 1324   | 281    | 4.707      | 2.235          | 0.001    | 1           |
| chr19 | 2037469   | 2051243   | <b>MKNK2</b>        | -      | 13774 | 1.899    | 769       | 1876   | 400    | 4.684      | 2.228          | 0.001    | 1           |
| chr7  | 108210188 | 108215294 | <b>DNAJB9</b>       | +      | 5106  | 1.219    | 186       | 454    | 97     | 4.673      | 2.224          | 0.005    | 1           |
| chr5  | 81569138  | 81574235  | <b>RPS23</b>        | -      | 5097  | 12.85    | 1961      | 4768   | 1025   | 4.652      | 2.218          | 0        | 1           |
| chrX  | 102470019 | 102472128 | <b>BEX4</b>         | +      | 2109  | 1.37     | 85        | 205    | 45     | 4.518      | 2.176          | 0.017    | 1           |
| chr6  | 144324033 | 144329867 | <b>HYMAI1</b>       | -      | 5834  | 2.156    | 376       | 902    | 200    | 4.493      | 2.168          | 0.003    | 1           |
| chr16 | 56716381  | 56718108  | <b>MT1X</b>         | +      | 1727  | 1.504    | 76        | 184    | 41     | 4.492      | 2.167          | 0.02     | 1           |
| chr14 | 50085406  | 50087349  | <b>RPL36AL</b>      | -      | 1943  | 6.952    | 403       | 967    | 215    | 4.484      | 2.165          | 0.003    | 1           |
| chr3  | 160232694 | 160233024 | <b>SCARNA7</b>      | -      | 330   | 15.178   | 153       | 367    | 82     | 4.463      | 2.158          | 0.006    | 1           |
| chr6  | 31795511  | 31798031  | <b>HSPA1B</b>       | +      | 2520  | 2.171    | 163       | 390    | 87     | 4.462      | 2.158          | 0.009    | 1           |
| chr19 | 48281841  | 48287943  | <b>SEPW1</b>        | +      | 6102  | 3.514    | 637       | 1522   | 342    | 4.445      | 2.152          | 0.002    | 1           |
| chr10 | 94449680  | 94455408  | <b>HHEX</b>         | +      | 5728  | 1.001    | 169       | 403    | 91     | 4.432      | 2.148          | 0.01     | 1           |
| chr12 | 6619387   | 6619717   | <b>SCARNA10</b>     | +      | 330   | 13.613   | 138       | 328    | 74     | 4.409      | 2.14           | 0.006    | 1           |
| chrX  | 20154183  | 20154531  | <b>SCARNA9L</b>     | -      | 348   | 1.151    | 12        | 29     | 6      | 4.391      | 2.135          | 0.071    | 1           |
| chr8  | 56980738  | 56987140  | <b>RPS20</b>        | -      | 6402  | 6.376    | 1223      | 2904   | 662    | 4.383      | 2.132          | 0.001    | 1           |
| chr6  | 89790428  | 89794879  | <b>PNRC1</b>        | +      | 4451  | 7.801    | 1032      | 2445   | 561    | 4.355      | 2.123          | 0.001    | 1           |
| chr15 | 44092618  | 44094769  | <b>C15orf63</b>     | +      | 2151  | 3.067    | 197       | 467    | 107    | 4.343      | 2.119          | 0.008    | 1           |
| chr19 | 35225479  | 35233774  | <b>ZNF181</b>       | +      | 8295  | 1.547    | 383       | 906    | 208    | 4.34       | 2.118          | 0.004    | 1           |
| chr12 | 6571403   | 6579843   | <b>VAMP1</b>        | -      | 8440  | 3.796    | 956       | 2259   | 522    | 4.327      | 2.113          | 0.001    | 1           |
| chr17 | 56160779  | 56167618  | <b>DYNLL2</b>       | +      | 6839  | 6.153    | 1255      | 2963   | 686    | 4.318      | 2.11           | 0.001    | 1           |
| chr6  | 99968869  | 99981059  | <b>LOC100130890</b> | +      | 12190 | 1.87     | 686       | 1613   | 377    | 4.273      | 2.095          | 0.002    | 1           |
| chr3  | 42632297  | 42636490  | <b>SS18L2</b>       | +      | 4193  | 2.367    | 296       | 693    | 164    | 4.229      | 2.08           | 0.006    | 1           |
| chr3  | 158384202 | 158390482 | <b>LXN</b>          | -      | 6280  | 1.068    | 201       | 470    | 111    | 4.228      | 2.08           | 0.009    | 1           |
| chr2  | 55459038  | 55462989  | <b>RPS27A</b>       | +      | 3951  | 6.13     | 726       | 1698   | 403    | 4.213      | 2.075          | 0.002    | 1           |
| chr5  | 72848024  | 72861511  | <b>ANKRA2</b>       | -      | 13487 | 1.368    | 558       | 1304   | 309    | 4.211      | 2.074          | 0.002    | 1           |
| chr10 | 95653729  | 95662491  | <b>SLC35G1</b>      | +      | 8762  | 1.361    | 358       | 837    | 198    | 4.21       | 2.074          | 0.004    | 1           |
| chr2  | 24290453  | 24299314  | <b>SF3B14</b>       | -      | 8861  | 2.31     | 617       | 1440   | 342    | 4.209      | 2.073          | 0.002    | 1           |

|       |           |           |              |   |       |        |      |      |      |       |       |       |   |
|-------|-----------|-----------|--------------|---|-------|--------|------|------|------|-------|-------|-------|---|
| chr11 | 22843597  | 22851382  | SVIP         | - | 7785  | 1.061  | 245  | 572  | 136  | 4.207 | 2.073 | 0.009 | 1 |
| chr15 | 40327890  | 40331389  | SRP14        | - | 3499  | 5.521  | 583  | 1356 | 325  | 4.166 | 2.059 | 0.002 | 1 |
| chr4  | 6675820   | 6677774   | LOC93622     | + | 1954  | 1.487  | 86   | 200  | 48   | 4.148 | 2.052 | 0.025 | 1 |
| chr6  | 150385742 | 150390202 | ULBP3        | - | 4460  | 1.014  | 134  | 312  | 75   | 4.147 | 2.052 | 0.018 | 1 |
| chr13 | 111365082 | 111373421 | ING1         | + | 8339  | 1.927  | 477  | 1108 | 267  | 4.145 | 2.051 | 0.004 | 1 |
| chr3  | 180701497 | 180707562 | DNAJC19      | - | 6065  | 1.57   | 285  | 662  | 159  | 4.145 | 2.051 | 0.007 | 1 |
| chr2  | 198364720 | 198368187 | HSPE1        | + | 3467  | 2.46   | 254  | 589  | 142  | 4.141 | 2.05  | 0.009 | 1 |
| chr17 | 8076296   | 8079714   | TMEM107      | - | 3418  | 2.678  | 277  | 643  | 155  | 4.131 | 2.047 | 0.006 | 1 |
| chrX  | 100878119 | 100882831 | ARMCX3       | + | 4712  | 4.16   | 592  | 1371 | 332  | 4.127 | 2.045 | 0.003 | 1 |
| chr7  | 92158086  | 92166823  | RBM48        | + | 8737  | 2.454  | 648  | 1499 | 364  | 4.114 | 2.041 | 0.002 | 1 |
| chr1  | 115110180 | 115124265 | BCAS2        | - | 14085 | 1.653  | 702  | 1624 | 395  | 4.112 | 2.04  | 0.002 | 1 |
| chr10 | 75541807  | 75543406  | CHCHD1       | + | 1599  | 2.246  | 108  | 251  | 61   | 4.107 | 2.038 | 0.017 | 1 |
| chr9  | 35732316  | 35737005  | CREB3        | + | 4689  | 3.094  | 433  | 1001 | 244  | 4.102 | 2.036 | 0.005 | 1 |
| chr5  | 156565450 | 156569921 | MED7         | - | 4471  | 1.932  | 261  | 603  | 147  | 4.091 | 2.032 | 0.007 | 1 |
| chr1  | 153963238 | 153964631 | RP527        | + | 1393  | 14.908 | 622  | 1430 | 352  | 4.059 | 2.021 | 0.003 | 1 |
| chr1  | 145507556 | 145513535 | RBM8A        | + | 5979  | 2.31   | 414  | 952  | 234  | 4.058 | 2.021 | 0.005 | 1 |
| chrX  | 100600643 | 100603957 | TIMM8A       | - | 3314  | 1.067  | 106  | 244  | 60   | 4.057 | 2.02  | 0.021 | 1 |
| chr10 | 22605311  | 22609246  | COMMD3       | + | 3935  | 2.428  | 287  | 658  | 163  | 4.034 | 2.012 | 0.008 | 1 |
| chr18 | 47340392  | 47340813  | SCARNA17     | + | 421   | 1.043  | 13   | 30   | 7    | 4.018 | 2.007 | 0.081 | 1 |
| chr9  | 33025208  | 33039062  | DNAJA1       | + | 13854 | 6.356  | 2650 | 6069 | 1510 | 4.017 | 2.006 | 0.002 | 1 |
| chr1  | 89517986  | 89531043  | GBP1         | - | 13057 | 1.012  | 397  | 910  | 226  | 4.016 | 2.006 | 0.006 | 1 |
| chr3  | 44771123  | 44778575  | ZNF501       | + | 7452  | 1.195  | 267  | 612  | 152  | 4.003 | 2.001 | 0.009 | 1 |
| chr19 | 40029446  | 40030838  | EID2         | - | 1392  | 2.729  | 113  | 259  | 65   | 3.994 | 1.998 | 0.023 | 1 |
| chr17 | 77806954  | 77813213  | BCX4         | - | 6259  | 2.737  | 508  | 1160 | 290  | 3.99  | 1.996 | 0.006 | 1 |
| chr4  | 186064416 | 186071538 | SLC25A4      | + | 7122  | 1.346  | 287  | 656  | 164  | 3.984 | 1.994 | 0.009 | 1 |
| chr7  | 10971579  | 10979813  | NDUFA4       | - | 8234  | 4.167  | 1040 | 2368 | 597  | 3.962 | 1.986 | 0.002 | 1 |
| chr12 | 121016847 | 121019201 | POU5F1       | - | 2354  | 1.663  | 117  | 267  | 67   | 3.946 | 1.98  | 0.022 | 1 |
| chr3  | 53919225  | 53925989  | SELK         | - | 6764  | 2.28   | 464  | 1054 | 267  | 3.941 | 1.978 | 0.005 | 1 |
| chr15 | 83654994  | 83659423  | FAM103A1     | + | 4429  | 1.477  | 196  | 445  | 113  | 3.926 | 1.973 | 0.015 | 1 |
| chr15 | 42834719  | 42841002  | LRRCS7       | - | 6283  | 1.81   | 343  | 777  | 198  | 3.909 | 1.967 | 0.008 | 1 |
| chr10 | 66585284  | 66586634  | ANXA2P3      | + | 1350  | 3.288  | 133  | 301  | 77   | 3.903 | 1.965 | 0.021 | 1 |
| chr4  | 89617065  | 89619023  | NAP1L5       | - | 1958  | 1.086  | 64   | 145  | 37   | 3.877 | 1.955 | 0.036 | 1 |
| chr3  | 170582664 | 170588045 | RPL22L1      | - | 5381  | 10.07  | 1628 | 3671 | 947  | 3.875 | 1.954 | 0.003 | 1 |
| chr13 | 25670275  | 25672704  | PABPC3       | + | 2429  | 1.142  | 84   | 189  | 49   | 3.837 | 1.94  | 0.028 | 1 |
| chr2  | 86426555  | 86440477  | MRPL35       | + | 13922 | 1.494  | 629  | 1412 | 368  | 3.833 | 1.938 | 0.004 | 1 |
| chr1  | 40974432  | 40982214  | DEM1         | + | 7782  | 1.333  | 311  | 699  | 182  | 3.824 | 1.935 | 0.011 | 1 |
| chr4  | 89442134  | 89444955  | PIGY         | - | 2821  | 4.16   | 354  | 791  | 208  | 3.788 | 1.921 | 0.009 | 1 |
| chr12 | 56660641  | 56664750  | COQ10A       | + | 4109  | 1.178  | 143  | 320  | 84   | 3.787 | 1.921 | 0.027 | 1 |
| chrX  | 69506210  | 69509798  | PDDZ11       | - | 3588  | 1.364  | 147  | 328  | 86   | 3.781 | 1.919 | 0.023 | 1 |
| chr12 | 56704212  | 56710006  | CNPY2        | - | 5916  | 2.41   | 419  | 934  | 247  | 3.766 | 1.913 | 0.009 | 1 |
| chrX  | 55478537  | 55479999  | MAGEH1       | + | 1462  | 1.239  | 53   | 119  | 31   | 3.748 | 1.906 | 0.06  | 1 |
| chr14 | 61438166  | 61447782  | TRMT5        | - | 9616  | 1.41   | 412  | 915  | 244  | 3.743 | 1.904 | 0.008 | 1 |
| chr10 | 104613966 | 104624718 | LOC10orf32   | + | 10752 | 1.995  | 651  | 1446 | 386  | 3.741 | 1.903 | 0.005 | 1 |
| chr6  | 86386724  | 86388451  | SNHG5        | - | 1727  | 26.254 | 1368 | 3037 | 812  | 3.739 | 1.903 | 0.003 | 1 |
| chr15 | 45003684  | 45010357  | B2M          | + | 6673  | 19.617 | 3955 | 8775 | 2349 | 3.736 | 1.901 | 0.005 | 1 |
| chr2  | 120436742 | 120439694 | TMEM177      | + | 2952  | 1.444  | 126  | 281  | 75   | 3.731 | 1.9   | 0.03  | 1 |
| chr6  | 3153901   | 3157783   | TUBB2A       | - | 3882  | 4.597  | 534  | 1185 | 318  | 3.726 | 1.898 | 0.008 | 1 |
| chr19 | 58011308  | 58019510  | ZNF773       | + | 8202  | 1.433  | 352  | 779  | 209  | 3.719 | 1.895 | 0.012 | 1 |
| chr7  | 25158269  | 25164980  | CYC5         | - | 6711  | 4.62   | 935  | 2067 | 557  | 3.708 | 1.891 | 0.004 | 1 |
| chr3  | 23958638  | 23962332  | RPL15        | + | 3694  | 11.041 | 1233 | 2724 | 737  | 3.696 | 1.886 | 0.004 | 1 |
| chr15 | 40985952  | 40987303  | LOC100505648 | - | 1351  | 2.082  | 83   | 185  | 50   | 3.693 | 1.885 | 0.042 | 1 |
| chr1  | 8071778   | 8086393   | ERRF1        | - | 14615 | 2.383  | 1045 | 2306 | 624  | 3.691 | 1.884 | 0.005 | 1 |
| chr2  | 74682149  | 74685087  | INO80B       | + | 2938  | 1.062  | 94   | 207  | 56   | 3.681 | 1.88  | 0.036 | 1 |
| chrX  | 119759528 | 119764005 | C1GALT1C1    | - | 4477  | 1.27   | 172  | 379  | 103  | 3.68  | 1.88  | 0.021 | 1 |
| chr7  | 30052883  | 30066268  | FKBP14       | - | 13385 | 1.272  | 516  | 1137 | 309  | 3.673 | 1.877 | 0.007 | 1 |
| chr12 | 25348149  | 25357949  | LVRM5        | + | 9800  | 1.378  | 409  | 900  | 245  | 3.668 | 1.875 | 0.009 | 1 |
| chr12 | 6601315   | 6602471   | MRPL51       | - | 1156  | 5.579  | 194  | 427  | 116  | 3.661 | 1.872 | 0.021 | 1 |
| chr9  | 127997126 | 128003666 | HSPA5        | - | 6540  | 10.245 | 2032 | 4455 | 1224 | 3.638 | 1.863 | 0.004 | 1 |
| chr14 | 76117232  | 76127538  | C14orf1      | - | 10306 | 1.259  | 390  | 855  | 235  | 3.634 | 1.862 | 0.012 | 1 |
| chr6  | 153308399 | 153323925 | MTRF1L       | - | 15526 | 2.59   | 1217 | 2665 | 735  | 3.625 | 1.858 | 0.004 | 1 |
| chrX  | 102840418 | 102842655 | TCEAL4       | + | 2237  | 9.948  | 674  | 1475 | 407  | 3.619 | 1.856 | 0.006 | 1 |
| chr4  | 120217573 | 120225600 | C4orf3       | - | 8027  | 2.207  | 539  | 1173 | 327  | 3.582 | 1.841 | 0.008 | 1 |
| chr9  | 132589563 | 132597572 | C9orf78      | - | 8009  | 1.639  | 396  | 861  | 241  | 3.571 | 1.836 | 0.012 | 1 |
| chr12 | 49490922  | 49504680  | LMBR1L       | - | 13758 | 1.183  | 489  | 1063 | 298  | 3.565 | 1.834 | 0.011 | 1 |
| chr16 | 87425800  | 87438380  | MAP1LC3B     | + | 12580 | 3.866  | 1462 | 3175 | 891  | 3.561 | 1.832 | 0.006 | 1 |
| chr1  | 110943876 | 110950546 | HBXIP        | - | 6670  | 3.562  | 719  | 1561 | 438  | 3.56  | 1.832 | 0.007 | 1 |
| chr5  | 98264837  | 98266713  | LOC100289230 | + | 1876  | 3.241  | 182  | 397  | 111  | 3.56  | 1.832 | 0.027 | 1 |
| chr5  | 74063102  | 74072734  | NSA2         | + | 9632  | 1.783  | 527  | 1144 | 321  | 3.555 | 1.83  | 0.007 | 1 |
| chr16 | 57279037  | 57287545  | ARL2BP       | + | 8508  | 3.542  | 913  | 1981 | 557  | 3.551 | 1.828 | 0.006 | 1 |
| chr12 | 53342654  | 53346685  | KRT18        | + | 4031  | 2.065  | 254  | 552  | 155  | 3.544 | 1.826 | 0.016 | 1 |
| chr4  | 71554195  | 71556268  | UTP3         | + | 2073  | 5.706  | 360  | 781  | 220  | 3.544 | 1.825 | 0.012 | 1 |

|       |           |           |                     |   |       |        |      |      |      |       |       |       |   |
|-------|-----------|-----------|---------------------|---|-------|--------|------|------|------|-------|-------|-------|---|
| chr12 | 6976583   | 6980110   | <b>TPI1</b>         | + | 3527  | 4      | 422  | 915  | 258  | 3.541 | 1.824 | 0.014 | 1 |
| chr8  | 38846326  | 38854041  | <b>TM2D2</b>        | - | 7715  | 2.672  | 623  | 1350 | 381  | 3.54  | 1.824 | 0.008 | 1 |
| chr1  | 203274663 | 203278729 | <b>BTG2</b>         | + | 4066  | 6.931  | 835  | 1808 | 511  | 3.535 | 1.822 | 0.009 | 1 |
| chr6  | 52535883  | 52551385  | <b>TMEM14A</b>      | + | 15502 | 1.235  | 581  | 1257 | 356  | 3.525 | 1.818 | 0.008 | 1 |
| chr4  | 113196781 | 113207059 | <b>TIFA</b>         | - | 10278 | 1.041  | 322  | 695  | 197  | 3.52  | 1.816 | 0.018 | 1 |
| chr9  | 131445933 | 131458675 | <b>SET</b>          | + | 12742 | 2.51   | 967  | 2089 | 594  | 3.516 | 1.814 | 0.006 | 1 |
| chr12 | 107371068 | 107380929 | <b>MTERFD3</b>      | - | 9861  | 1.946  | 587  | 1266 | 360  | 3.512 | 1.812 | 0.008 | 1 |
| chr2  | 176040985 | 176046490 | <b>ATP5G3</b>       | - | 5505  | 6.104  | 1018 | 2195 | 625  | 3.509 | 1.811 | 0.006 | 1 |
| chr5  | 54455983  | 54463129  | <b>GPX8</b>         | + | 7146  | 6.328  | 1387 | 2989 | 853  | 3.503 | 1.809 | 0.004 | 1 |
| chr14 | 24612573  | 24615855  | <b>PSME2</b>        | - | 3282  | 1.899  | 187  | 403  | 115  | 3.501 | 1.808 | 0.029 | 1 |
| chr8  | 97239303  | 97247862  | <b>UQCRB</b>        | - | 8559  | 2.586  | 672  | 1446 | 413  | 3.497 | 1.806 | 0.008 | 1 |
| chr1  | 43849587  | 43855483  | <b>MED8</b>         | - | 5896  | 5.063  | 905  | 1948 | 557  | 3.495 | 1.805 | 0.006 | 1 |
| chr16 | 3348807   | 3355439   | <b>TIGD7</b>        | - | 6632  | 1.297  | 259  | 558  | 160  | 3.486 | 1.801 | 0.021 | 1 |
| chr7  | 42948871  | 42951689  | <b>C7orf25</b>      | - | 2818  | 1.802  | 153  | 330  | 94   | 3.48  | 1.799 | 0.031 | 1 |
| chr20 | 30532757  | 30539883  | <b>PDRG1</b>        | - | 7126  | 2.041  | 434  | 932  | 268  | 3.467 | 1.794 | 0.017 | 1 |
| chr9  | 115804173 | 115818996 | <b>ZFP37</b>        | - | 14823 | 1.6    | 718  | 1539 | 445  | 3.458 | 1.79  | 0.009 | 1 |
| chr1  | 109642814 | 109643234 | <b>SCARNA2</b>      | + | 420   | 12.641 | 157  | 337  | 97   | 3.448 | 1.786 | 0.041 | 1 |
| chr12 | 7053202   | 7055165   | <b>C12orf57</b>     | + | 1963  | 6.728  | 395  | 844  | 245  | 3.445 | 1.785 | 0.019 | 1 |
| chr2  | 207024317 | 207027653 | <b>EEF1B2</b>       | + | 3336  | 3.855  | 390  | 834  | 242  | 3.443 | 1.784 | 0.015 | 1 |
| chr12 | 56435685  | 56438007  | <b>RPS26</b>        | + | 2322  | 9.992  | 703  | 1504 | 437  | 3.442 | 1.783 | 0.009 | 1 |
| chr20 | 58508818  | 58523702  | <b>C20orf177</b>    | + | 14884 | 1.927  | 872  | 1863 | 542  | 3.437 | 1.781 | 0.007 | 1 |
| chr4  | 101107026 | 101111655 | <b>DDIT4L</b>       | - | 4629  | 1.458  | 204  | 436  | 127  | 3.425 | 1.776 | 0.027 | 1 |
| chr10 | 60145175  | 60155897  | <b>TFAM</b>         | + | 10722 | 2.481  | 805  | 1716 | 501  | 3.422 | 1.775 | 0.009 | 1 |
| chr2  | 37423634  | 37431886  | <b>LOC100505876</b> | + | 8252  | 2.292  | 574  | 1224 | 358  | 3.421 | 1.774 | 0.011 | 1 |
| chrX  | 118920468 | 118925606 | <b>RPL39</b>        | - | 5138  | 4.73   | 735  | 1565 | 458  | 3.414 | 1.771 | 0.009 | 1 |
| chr13 | 108859791 | 108870716 | <b>LIG4</b>         | - | 10925 | 1.154  | 384  | 816  | 239  | 3.404 | 1.767 | 0.016 | 1 |
| chr4  | 140374960 | 140397069 | <b>RAB33B</b>       | + | 22109 | 1.44   | 960  | 2041 | 600  | 3.399 | 1.765 | 0.009 | 1 |
| chr5  | 2746278   | 2751769   | <b>IRX2</b>         | - | 5491  | 1.701  | 279  | 591  | 174  | 3.385 | 1.759 | 0.028 | 1 |
| chr11 | 57471186  | 57479673  | <b>MED19</b>        | - | 8487  | 1.81   | 464  | 985  | 291  | 3.382 | 1.758 | 0.015 | 1 |
| chr1  | 110009099 | 110024764 | <b>SYPL2</b>        | + | 15665 | 1.469  | 691  | 1466 | 433  | 3.381 | 1.758 | 0.012 | 1 |
| chr21 | 38437663  | 38445458  | <b>PIGP</b>         | - | 7795  | 1.498  | 356  | 754  | 223  | 3.374 | 1.754 | 0.017 | 1 |
| chr1  | 43232915  | 43241413  | <b>C1orf50</b>      | + | 8498  | 1.587  | 410  | 867  | 257  | 3.369 | 1.753 | 0.016 | 1 |
| chr12 | 11323779  | 11325723  | <b>LOC100129361</b> | + | 1944  | 4.039  | 238  | 505  | 149  | 3.369 | 1.752 | 0.026 | 1 |
| chr14 | 90863326  | 90874619  | <b>CALM1</b>        | + | 11293 | 10.857 | 3720 | 7870 | 2337 | 3.366 | 1.751 | 0.01  | 1 |
| chr1  | 156638555 | 156647189 | <b>NES</b>          | - | 8634  | 1.898  | 495  | 1047 | 311  | 3.364 | 1.75  | 0.015 | 1 |
| chr12 | 77252495  | 77272799  | <b>CSRP2</b>        | - | 20304 | 2.437  | 1505 | 3179 | 946  | 3.358 | 1.747 | 0.007 | 1 |
| chr5  | 140560979 | 140565796 | <b>PCDH16</b>       | + | 4817  | 1.301  | 188  | 397  | 118  | 3.357 | 1.747 | 0.035 | 1 |
| chr1  | 244998638 | 245008359 | <b>FAM36A</b>       | + | 9721  | 4.113  | 1217 | 2570 | 766  | 3.355 | 1.747 | 0.008 | 1 |
| chr19 | 56132106  | 56135941  | <b>ZNF784</b>       | - | 3835  | 1.093  | 125  | 265  | 79   | 3.343 | 1.741 | 0.05  | 1 |
| chr12 | 54104901  | 54121307  | <b>CNCOC01</b>      | - | 16406 | 1.191  | 592  | 1248 | 373  | 3.342 | 1.741 | 0.013 | 1 |
| chr20 | 54933982  | 54943718  | <b>FAM210B</b>      | + | 9736  | 1.293  | 379  | 798  | 239  | 3.338 | 1.739 | 0.021 | 1 |
| chr2  | 224822120 | 224832431 | <b>MRPL44</b>       | + | 10311 | 2.961  | 933  | 1966 | 589  | 3.336 | 1.738 | 0.008 | 1 |
| chr1  | 25568739  | 25573985  | <b>C1orf63</b>      | - | 5246  | 17.074 | 2711 | 5706 | 1713 | 3.331 | 1.736 | 0.01  | 1 |
| chr1  | 27992571  | 27998724  | <b>IFI6</b>         | - | 6153  | 1.181  | 216  | 455  | 136  | 3.328 | 1.735 | 0.037 | 1 |
| chrX  | 71346960  | 71351751  | <b>RGAG4</b>        | - | 4791  | 1.166  | 166  | 350  | 105  | 3.327 | 1.734 | 0.045 | 1 |
| chr6  | 16129316  | 16148478  | <b>MYLIP</b>        | + | 19162 | 1.39   | 793  | 1669 | 502  | 3.324 | 1.733 | 0.015 | 1 |
| chr3  | 101280711 | 101285089 | <b>RG9MTD1</b>      | + | 4378  | 3.165  | 422  | 887  | 267  | 3.324 | 1.733 | 0.017 | 1 |
| chr3  | 150259779 | 150264428 | <b>SERP1</b>        | - | 4649  | 6.895  | 972  | 2039 | 616  | 3.309 | 1.726 | 0.01  | 1 |
| chr1  | 226250407 | 226259703 | <b>H3F3A</b>        | + | 9296  | 5.592  | 1592 | 3341 | 1010 | 3.308 | 1.726 | 0.007 | 1 |
| chr3  | 58413356  | 58419579  | <b>PDHB</b>         | - | 6223  | 5.268  | 1001 | 2094 | 636  | 3.29  | 1.718 | 0.009 | 1 |
| chr20 | 48599512  | 48605420  | <b>SNAI1</b>        | + | 5908  | 3.116  | 554  | 1159 | 353  | 3.284 | 1.716 | 0.017 | 1 |
| chr13 | 76099349  | 76111991  | <b>COMMD6</b>       | - | 12642 | 1.897  | 729  | 1524 | 464  | 3.281 | 1.714 | 0.012 | 1 |
| chr6  | 17600517  | 17611950  | <b>FAM8A1</b>       | + | 11433 | 1.045  | 362  | 756  | 230  | 3.28  | 1.714 | 0.023 | 1 |
| chr5  | 60453535  | 60458302  | <b>C5orf43</b>      | + | 4767  | 5.393  | 782  | 1634 | 498  | 3.278 | 1.713 | 0.011 | 1 |
| chr6  | 116832807 | 116839709 | <b>FAM26E</b>       | - | 6902  | 1.552  | 328  | 686  | 209  | 3.275 | 1.711 | 0.021 | 1 |
| chr7  | 93551015  | 93555826  | <b>GNG11</b>        | + | 4811  | 4.219  | 622  | 1299 | 397  | 3.273 | 1.71  | 0.012 | 1 |
| chr19 | 47724078  | 47736023  | <b>BBC3</b>         | - | 11945 | 3.276  | 1168 | 2438 | 745  | 3.271 | 1.71  | 0.013 | 1 |
| chr3  | 129149792 | 129158852 | <b>MBD4</b>         | - | 9060  | 3.53   | 969  | 2023 | 618  | 3.271 | 1.71  | 0.011 | 1 |
| chrX  | 75392770  | 75398033  | <b>CXorf26</b>      | + | 5263  | 2.899  | 461  | 962  | 294  | 3.263 | 1.706 | 0.02  | 1 |
| chr6  | 44225902  | 44233525  | <b>NFKBIE</b>       | - | 7623  | 1.349  | 307  | 639  | 196  | 3.251 | 1.701 | 0.032 | 1 |
| chrX  | 102507922 | 102510121 | <b>TCEAL8</b>       | - | 2199  | 3.865  | 258  | 538  | 165  | 3.249 | 1.7   | 0.029 | 1 |
| chr7  | 27135712  | 27139877  | <b>HOTAIRM1</b>     | + | 4165  | 2.07   | 258  | 537  | 165  | 3.248 | 1.7   | 0.035 | 1 |
| chr6  | 31321648  | 31324989  | <b>HLA-B</b>        | - | 3341  | 2.399  | 239  | 498  | 153  | 3.247 | 1.699 | 0.038 | 1 |
| chr18 | 47014850  | 47018935  | <b>RPL17</b>        | - | 4085  | 11.248 | 1405 | 2919 | 901  | 3.24  | 1.696 | 0.009 | 1 |
| chr17 | 7123152   | 7128585   | <b>ACADVL</b>       | + | 5433  | 5.371  | 885  | 1837 | 567  | 3.237 | 1.694 | 0.012 | 1 |
| chr3  | 16298567  | 16306496  | <b>DPH3</b>         | + | 7929  | 3.106  | 751  | 1559 | 482  | 3.234 | 1.693 | 0.012 | 1 |
| chr9  | 111696672 | 111703237 | <b>FAM206A</b>      | + | 6565  | 1.082  | 215  | 445  | 138  | 3.231 | 1.692 | 0.036 | 1 |
| chr4  | 119199916 | 119200978 | <b>SNHG8</b>        | + | 1062  | 25.882 | 831  | 1723 | 533  | 3.231 | 1.692 | 0.014 | 1 |
| chr2  | 170550963 | 170558218 | <b>PHOSPHO2</b>     | + | 7255  | 1.427  | 313  | 649  | 201  | 3.226 | 1.69  | 0.029 | 1 |
| chr6  | 56911383  | 56920023  | <b>KIAA1586</b>     | + | 8640  | 3.654  | 961  | 1991 | 618  | 3.221 | 1.687 | 0.011 | 1 |
| chr10 | 30722949  | 30750762  | <b>MAP3K8</b>       | + | 27813 | 1.071  | 898  | 1860 | 577  | 3.22  | 1.687 | 0.014 | 1 |

|       |           |           |                  |   |       |        |      |      |      |       |       |       |   |
|-------|-----------|-----------|------------------|---|-------|--------|------|------|------|-------|-------|-------|---|
| chr16 | 72118755  | 72128215  | <b>TXNL4B</b>    | - | 9460  | 1.401  | 399  | 827  | 257  | 3.22  | 1.687 | 0.025 | 1 |
| chr16 | 50059188  | 50070999  | <b>TMEM188</b>   | + | 11811 | 1.879  | 674  | 1396 | 433  | 3.218 | 1.686 | 0.015 | 1 |
| chr9  | 71394963  | 71398609  | <b>FAM122A</b>   | + | 3646  | 2.948  | 323  | 668  | 208  | 3.203 | 1.679 | 0.031 | 1 |
| chr4  | 53578620  | 53580305  | <b>SNHG13</b>    | + | 1685  | 6.151  | 311  | 643  | 200  | 3.202 | 1.679 | 0.033 | 1 |
| chr14 | 96001322  | 96011055  | <b>GLRX5</b>     | + | 9733  | 2.054  | 609  | 1258 | 393  | 3.198 | 1.677 | 0.016 | 1 |
| chr11 | 59573607  | 59578345  | <b>MRPL16</b>    | - | 4738  | 2.475  | 357  | 737  | 231  | 3.19  | 1.674 | 0.025 | 1 |
| chrX  | 118370210 | 118378429 | <b>PGRMC1</b>    | + | 8219  | 5.73   | 1434 | 2954 | 927  | 3.184 | 1.671 | 0.011 | 1 |
| chr3  | 52739856  | 52742197  | <b>SPCS1</b>     | + | 2341  | 3.598  | 254  | 524  | 165  | 3.172 | 1.665 | 0.036 | 1 |
| chr10 | 44139306  | 44144326  | <b>ZNF32</b>     | - | 5020  | 1.408  | 216  | 444  | 140  | 3.171 | 1.665 | 0.035 | 1 |
| chr2  | 170655388 | 170668575 | <b>SSB</b>       | + | 13187 | 2.082  | 839  | 1723 | 544  | 3.168 | 1.663 | 0.013 | 1 |
| chr1  | 159997461 | 160001783 | <b>PIGM</b>      | - | 4322  | 1.148  | 149  | 307  | 97   | 3.166 | 1.663 | 0.054 | 1 |
| chr12 | 57984941  | 57997211  | <b>PIP4K2C</b>   | + | 12270 | 1.672  | 621  | 1273 | 404  | 3.152 | 1.656 | 0.019 | 1 |
| chr5  | 131817300 | 131826465 | <b>IRF1</b>      | - | 9165  | 2.505  | 689  | 1411 | 448  | 3.145 | 1.653 | 0.021 | 1 |
| chr5  | 43042235  | 43045370  | <b>LOC153684</b> | + | 3135  | 1.991  | 188  | 385  | 122  | 3.145 | 1.653 | 0.049 | 1 |
| chr12 | 120907659 | 120936298 | <b>DNLL1</b>     | + | 28639 | 1.01   | 879  | 1798 | 572  | 3.141 | 1.651 | 0.015 | 1 |
| chr12 | 66516848  | 66524533  | <b>LLPH</b>      | - | 7685  | 3.263  | 762  | 1559 | 496  | 3.141 | 1.651 | 0.016 | 1 |
| chr19 | 58125829  | 58133636  | <b>ZNF134</b>    | + | 7807  | 4.004  | 951  | 1946 | 619  | 3.14  | 1.651 | 0.014 | 1 |
| chr3  | 112709799 | 112720221 | <b>GTPBP8</b>    | + | 10422 | 2.168  | 691  | 1414 | 451  | 3.136 | 1.649 | 0.016 | 1 |
| chr12 | 123745539 | 123756687 | <b>CDK2AP1</b>   | - | 11148 | 2.311  | 782  | 1598 | 510  | 3.135 | 1.648 | 0.017 | 1 |
| chr2  | 70523107  | 70529220  | <b>FAM136A</b>   | - | 6113  | 1.562  | 289  | 590  | 189  | 3.127 | 1.645 | 0.035 | 1 |
| chr8  | 23536205  | 23540450  | <b>NKX3-1</b>    | - | 4245  | 1.095  | 139  | 283  | 90   | 3.121 | 1.642 | 0.065 | 1 |
| chr15 | 43477465  | 43489375  | <b>CCNDBP1</b>   | + | 11910 | 2.93   | 1062 | 2167 | 694  | 3.12  | 1.642 | 0.014 | 1 |
| chr8  | 117778741 | 117786921 | <b>UTP23</b>     | + | 8180  | 3.035  | 760  | 1550 | 496  | 3.12  | 1.642 | 0.015 | 1 |
| chr9  | 96208781  | 96215874  | <b>FAM120AOS</b> | - | 7093  | 1.599  | 344  | 702  | 225  | 3.119 | 1.641 | 0.031 | 1 |
| chr3  | 40351172  | 40353915  | <b>EIF1B</b>     | + | 2743  | 4.231  | 348  | 711  | 228  | 3.117 | 1.64  | 0.035 | 1 |
| chr11 | 93454679  | 93455032  | <b>SCARNA9</b>   | + | 353   | 2.336  | 25   | 52   | 16   | 3.115 | 1.639 | 0.123 | 0 |
| chr20 | 18548072  | 18550203  | <b>LINC00493</b> | + | 2131  | 2.585  | 167  | 340  | 109  | 3.108 | 1.636 | 0.052 | 1 |
| chr15 | 63445538  | 63449741  | <b>RPS27L</b>    | - | 4203  | 10.447 | 1337 | 2718 | 876  | 3.1   | 1.632 | 0.014 | 1 |
| chr8  | 101162838 | 101166230 | <b>POLR2K</b>    | + | 3392  | 3.278  | 343  | 697  | 225  | 3.094 | 1.63  | 0.027 | 1 |
| chr5  | 139929652 | 139937678 | <b>SRA1</b>      | - | 8026  | 4.071  | 998  | 2024 | 656  | 3.083 | 1.625 | 0.015 | 1 |
| chr9  | 19376253  | 19380235  | <b>RPS6</b>      | - | 3982  | 18.047 | 2204 | 4467 | 1449 | 3.082 | 1.624 | 0.014 | 1 |
| chr12 | 54356095  | 54362515  | <b>HPTAIR</b>    | - | 6420  | 3.762  | 735  | 1489 | 483  | 3.08  | 1.623 | 0.019 | 1 |
| chr11 | 125439297 | 125454575 | <b>EI2A</b>      | + | 15278 | 2.15   | 994  | 2012 | 654  | 3.073 | 1.62  | 0.018 | 1 |
| chr20 | 5095598   | 5107268   | <b>PCNA</b>      | - | 11670 | 4.674  | 1652 | 3343 | 1089 | 3.069 | 1.618 | 0.016 | 1 |
| chr6  | 138409641 | 138428660 | <b>PERP</b>      | - | 19019 | 1.749  | 1010 | 2042 | 666  | 3.064 | 1.615 | 0.017 | 1 |
| chr2  | 70485230  | 70508317  | <b>PCYOX1</b>    | + | 23087 | 1.077  | 755  | 1525 | 498  | 3.062 | 1.615 | 0.02  | 1 |
| chr14 | 93651295  | 93653431  | <b>C14orf109</b> | + | 2136  | 1.302  | 83   | 168  | 54   | 3.062 | 1.615 | 0.092 | 1 |
| chr5  | 137673223 | 137685418 | <b>FAM53C</b>    | + | 12195 | 4.111  | 1510 | 3050 | 996  | 3.061 | 1.614 | 0.018 | 1 |
| chr13 | 21750371  | 21753220  | <b>MRP63</b>     | + | 2849  | 1.398  | 120  | 242  | 79   | 3.058 | 1.613 | 0.07  | 1 |
| chr2  | 120124503 | 120130122 | <b>DBI</b>       | + | 5619  | 3.374  | 569  | 1148 | 375  | 3.055 | 1.611 | 0.029 | 1 |
| chr11 | 112097087 | 112104695 | <b>PTS</b>       | + | 7608  | 5.864  | 1365 | 2754 | 903  | 3.05  | 1.609 | 0.015 | 1 |
| chr6  | 160211491 | 160219461 | <b>MRPL18</b>    | + | 7970  | 2.242  | 546  | 1098 | 361  | 3.036 | 1.602 | 0.024 | 1 |
| chr8  | 125551342 | 125562227 | <b>NDUFB9</b>    | + | 10885 | 2.61   | 864  | 1739 | 573  | 3.035 | 1.602 | 0.019 | 1 |
| chr17 | 37006320  | 37010053  | <b>RPL23</b>     | - | 3733  | 11.299 | 1285 | 2585 | 851  | 3.035 | 1.602 | 0.016 | 1 |
| chr14 | 92582467  | 92588153  | <b>NDUFB1</b>    | - | 5686  | 2.213  | 384  | 773  | 254  | 3.034 | 1.601 | 0.031 | 1 |
| chr6  | 21593971  | 21598849  | <b>SOX4</b>      | + | 4878  | 1.28   | 190  | 382  | 126  | 3.03  | 1.599 | 0.052 | 1 |
| chr7  | 54819939  | 54826939  | <b>SEC61G</b>    | - | 7000  | 6.199  | 1327 | 2668 | 881  | 3.029 | 1.599 | 0.015 | 1 |
| chr5  | 34915819  | 34925787  | <b>BRX1</b>      | + | 9968  | 3.448  | 1050 | 2110 | 697  | 3.027 | 1.598 | 0.017 | 1 |
| chr17 | 7155371   | 7163259   | <b>C17orf81</b>  | + | 7888  | 1.426  | 341  | 685  | 226  | 3.027 | 1.598 | 0.037 | 1 |
| chr1  | 25548766  | 25559013  | <b>SYF2</b>      | - | 10247 | 2.469  | 774  | 1554 | 514  | 3.02  | 1.594 | 0.019 | 1 |
| chr5  | 140071017 | 140078890 | <b>HARS2</b>     | + | 7873  | 3.462  | 827  | 1660 | 549  | 3.019 | 1.594 | 0.021 | 1 |
| chr5  | 162930230 | 162946328 | <b>MAT2B</b>     | + | 16098 | 1.936  | 955  | 1916 | 635  | 3.014 | 1.592 | 0.017 | 1 |
| chr5  | 159828647 | 159846168 | <b>SLU7</b>      | - | 17521 | 2.067  | 1114 | 2232 | 741  | 3.012 | 1.591 | 0.015 | 1 |
| chr1  | 153946744 | 153950451 | <b>JTB</b>       | - | 3707  | 3.611  | 403  | 809  | 268  | 3.012 | 1.591 | 0.036 | 1 |
| chr9  | 22002901  | 22009312  | <b>CDKN2B</b>    | - | 6411  | 1.728  | 335  | 672  | 223  | 3.009 | 1.589 | 0.039 | 1 |
| chr10 | 75532048  | 75535976  | <b>FUT11</b>     | + | 3928  | 2.399  | 283  | 567  | 188  | 3.009 | 1.589 | 0.048 | 1 |
| chr3  | 58477822  | 58488087  | <b>KCTD6</b>     | + | 10265 | 1.738  | 544  | 1089 | 362  | 3.004 | 1.587 | 0.027 | 1 |
| chr1  | 161123533 | 161128646 | <b>UFC1</b>      | + | 5113  | 2.327  | 363  | 727  | 242  | 3.002 | 1.586 | 0.034 | 1 |
| chr17 | 7486964   | 7491527   | <b>MPDU1</b>     | + | 4563  | 2.003  | 276  | 554  | 184  | 3.002 | 1.586 | 0.046 | 1 |
| chr20 | 5918485   | 5931173   | <b>TRMT6</b>     | - | 12688 | 1.569  | 604  | 1209 | 403  | 3     | 1.585 | 0.027 | 1 |
| chr13 | 21714652  | 21723224  | <b>SAP18</b>     | + | 8572  | 4.675  | 1229 | 2458 | 819  | 3     | 1.585 | 0.016 | 1 |
| chr12 | 108956293 | 108963160 | <b>ISCU</b>      | + | 6867  | 4.327  | 900  | 1801 | 600  | 3     | 1.585 | 0.021 | 1 |
| chrX  | 71492452  | 71497141  | <b>RPS4X</b>     | - | 4689  | 6.424  | 921  | 1842 | 614  | 2.998 | 1.584 | 0.019 | 1 |
| chrX  | 118708498 | 118718379 | <b>UBE2A</b>     | + | 9881  | 3.487  | 1052 | 2101 | 702  | 2.991 | 1.581 | 0.019 | 1 |
| chr11 | 62559597  | 62572964  | <b>NXF1</b>      | - | 13367 | 4.132  | 1666 | 3326 | 1112 | 2.989 | 1.58  | 0.021 | 1 |
| chr10 | 102033712 | 102046439 | <b>BLOC1S2</b>   | - | 12727 | 2.898  | 1130 | 2255 | 755  | 2.986 | 1.578 | 0.017 | 1 |
| chr10 | 99195665  | 99205768  | <b>EXOSC1</b>    | - | 10103 | 1.246  | 383  | 765  | 256  | 2.986 | 1.578 | 0.035 | 1 |
| chr2  | 190526124 | 190535557 | <b>ASNSD1</b>    | + | 9433  | 3.166  | 919  | 1833 | 614  | 2.985 | 1.578 | 0.018 | 1 |
| chr1  | 28905049  | 28908366  | <b>SNHG12</b>    | - | 3317  | 16.287 | 1634 | 3258 | 1092 | 2.982 | 1.576 | 0.021 | 1 |
| chr22 | 39077953  | 39080766  | <b>TOMM22</b>    | + | 2813  | 2.726  | 233  | 465  | 156  | 2.982 | 1.576 | 0.049 | 1 |
| chr4  | 4237268   | 4249934   | <b>TMEM128</b>   | - | 12666 | 1.435  | 553  | 1102 | 370  | 2.98  | 1.575 | 0.028 | 1 |

|       |           |           |                     |   |       |        |      |      |      |       |       |       |   |
|-------|-----------|-----------|---------------------|---|-------|--------|------|------|------|-------|-------|-------|---|
| chr12 | 88429267  | 88443937  | <b>C12orf29</b>     | + | 14670 | 1.818  | 810  | 1615 | 542  | 2.978 | 1.574 | 0.023 | 1 |
| chr8  | 74888376  | 74895018  | <b>TMEM70</b>       | + | 6642  | 2.021  | 407  | 811  | 272  | 2.977 | 1.574 | 0.036 | 1 |
| chr15 | 49170289  | 49172380  | <b>EID1</b>         | + | 2091  | 12.323 | 790  | 1573 | 528  | 2.976 | 1.573 | 0.021 | 1 |
| chr5  | 44809026  | 44815618  | <b>MRPS30</b>       | + | 6592  | 2.652  | 529  | 1054 | 354  | 2.974 | 1.572 | 0.031 | 1 |
| chr19 | 18496967  | 18499986  | <b>GDF15</b>        | + | 3019  | 8.882  | 795  | 1584 | 532  | 2.973 | 1.572 | 0.033 | 1 |
| chr5  | 140024947 | 140027370 | <b>NDUFA2</b>       | - | 2423  | 2.156  | 157  | 313  | 105  | 2.971 | 1.571 | 0.069 | 1 |
| chr4  | 6717841   | 6719387   | <b>CNO</b>          | + | 1546  | 2.029  | 93   | 186  | 62   | 2.961 | 1.566 | 0.099 | 1 |
| chr17 | 73772514  | 73775860  | <b>H3F3B</b>        | - | 3346  | 40.926 | 4162 | 8267 | 2794 | 2.959 | 1.565 | 0.027 | 1 |
| chr17 | 34842472  | 34851662  | <b>ZNHIT3</b>       | + | 9190  | 1.637  | 453  | 900  | 304  | 2.953 | 1.562 | 0.037 | 1 |
| chrX  | 100910267 | 100914863 | <b>ARMCX2</b>       | - | 4596  | 1.291  | 181  | 359  | 121  | 2.953 | 1.562 | 0.06  | 1 |
| chr11 | 85339621  | 85347583  | <b>TMEM126B</b>     | + | 7962  | 2.077  | 502  | 996  | 337  | 2.95  | 1.561 | 0.033 | 1 |
| chr6  | 29855382  | 29858856  | <b>HLA-H</b>        | + | 3474  | 1.331  | 138  | 275  | 93   | 2.95  | 1.561 | 0.079 | 1 |
| chr4  | 140211070 | 140223705 | <b>NDUFC1</b>       | - | 12635 | 1.368  | 531  | 1052 | 357  | 2.945 | 1.558 | 0.027 | 1 |
| chr19 | 12175545  | 12188626  | <b>ZNF844</b>       | + | 13081 | 1.654  | 662  | 1312 | 445  | 2.943 | 1.557 | 0.025 | 1 |
| chr1  | 115312104 | 115323308 | <b>SIKE1</b>        | - | 11204 | 1.748  | 600  | 1188 | 404  | 2.938 | 1.555 | 0.027 | 1 |
| chr12 | 6875540   | 6880118   | <b>PTMS</b>         | + | 4578  | 7.3    | 1009 | 1998 | 680  | 2.937 | 1.554 | 0.025 | 1 |
| chr7  | 108202670 | 108210167 | <b>THAP5</b>        | - | 7497  | 1.864  | 429  | 848  | 289  | 2.93  | 1.551 | 0.033 | 1 |
| chr17 | 43224683  | 43229468  | <b>HEXIM1</b>       | + | 4785  | 3.876  | 561  | 1109 | 378  | 2.93  | 1.551 | 0.033 | 1 |
| chr20 | 18774692  | 18776709  | <b>LOC100270804</b> | + | 2017  | 1.1    | 68   | 134  | 46   | 2.926 | 1.549 | 0.097 | 1 |
| chr10 | 28808845  | 28821283  | <b>LOC220906</b>    | - | 12438 | 3.091  | 1176 | 2323 | 794  | 2.924 | 1.548 | 0.02  | 1 |
| chr19 | 44529493  | 44537262  | <b>ZNF222</b>       | + | 7769  | 1.089  | 255  | 505  | 172  | 2.924 | 1.548 | 0.056 | 1 |
| chr5  | 176730834 | 176733950 | <b>PRELID1</b>      | + | 3116  | 1.642  | 154  | 305  | 104  | 2.917 | 1.544 | 0.074 | 1 |
| chr11 | 66432469  | 66445275  | <b>RBMA8</b>        | - | 12806 | 1.002  | 391  | 771  | 265  | 2.91  | 1.541 | 0.039 | 1 |
| chr12 | 56211805  | 56214959  | <b>ORMDL2</b>       | + | 3154  | 2.949  | 284  | 560  | 192  | 2.91  | 1.541 | 0.048 | 1 |
| chr12 | 14927269  | 14930936  | <b>H2AFJ</b>        | + | 3667  | 3.904  | 434  | 855  | 293  | 2.909 | 1.541 | 0.04  | 1 |
| chr14 | 77924372  | 77935815  | <b>AHSA1</b>        | + | 11443 | 1.875  | 652  | 1283 | 441  | 2.906 | 1.539 | 0.03  | 1 |
| chr2  | 233412778 | 233415226 | <b>TIGD1</b>        | - | 2448  | 1.687  | 126  | 247  | 85   | 2.901 | 1.537 | 0.077 | 1 |
| chr1  | 24104875  | 24114722  | <b>PITHD1</b>       | + | 9847  | 2.25   | 676  | 1328 | 458  | 2.898 | 1.535 | 0.029 | 1 |
| chr22 | 19428409  | 19435755  | <b>C22orf39</b>     | - | 7346  | 2.001  | 447  | 878  | 303  | 2.895 | 1.534 | 0.039 | 1 |
| chr17 | 37885408  | 37886788  | <b>MIEN1</b>        | - | 1380  | 3.289  | 137  | 269  | 93   | 2.891 | 1.531 | 0.084 | 1 |
| chr4  | 110736665 | 110745893 | <b>GAR1</b>         | + | 9228  | 1.801  | 511  | 1002 | 348  | 2.881 | 1.526 | 0.031 | 1 |
| chrX  | 54466852  | 54471731  | <b>TSR2</b>         | + | 4879  | 1.772  | 263  | 516  | 179  | 2.881 | 1.527 | 0.055 | 1 |
| chr14 | 23564682  | 23569665  | <b>C14orf119</b>    | + | 4983  | 2.85   | 430  | 843  | 293  | 2.878 | 1.525 | 0.043 | 1 |
| chr11 | 34460471  | 34493607  | <b>CAT</b>          | + | 33136 | 1.052  | 1069 | 2094 | 727  | 2.877 | 1.525 | 0.023 | 1 |
| chr4  | 83814604  | 83822069  | <b>LOC100499177</b> | - | 7465  | 4.177  | 956  | 1873 | 651  | 2.876 | 1.524 | 0.024 | 1 |
| chr2  | 32248971  | 32264844  | <b>DPY30</b>        | - | 15873 | 1.103  | 533  | 1043 | 363  | 2.875 | 1.524 | 0.035 | 1 |
| chr19 | 58144534  | 58154147  | <b>ZNF211</b>       | + | 9613  | 1.732  | 506  | 991  | 344  | 2.875 | 1.523 | 0.037 | 1 |
| chr3  | 40498800  | 40503859  | <b>RPL14</b>        | + | 5059  | 5.818  | 904  | 1769 | 615  | 2.874 | 1.523 | 0.024 | 1 |
| chr11 | 10772810  | 10801290  | <b>CTR9</b>         | + | 28480 | 1.804  | 1579 | 3090 | 1076 | 2.871 | 1.521 | 0.021 | 1 |
| chr6  | 30029035  | 30032686  | <b>ZNRD1</b>        | + | 3651  | 1.298  | 143  | 281  | 98   | 2.87  | 1.521 | 0.081 | 1 |
| chr17 | 6915735   | 6917463   | <b>RNASEK</b>       | + | 2117  | 2.132  | 111  | 216  | 75   | 2.866 | 1.519 | 0.098 | 1 |
| chr12 | 48541571  | 48551377  | <b>ASB8</b>         | - | 9806  | 2.115  | 634  | 1238 | 432  | 2.863 | 1.518 | 0.031 | 1 |
| chr10 | 133781203 | 133795435 | <b>BNIP3</b>        | - | 14232 | 2.33   | 1005 | 1963 | 686  | 2.86  | 1.516 | 0.028 | 1 |
| chr15 | 66791652  | 66797193  | <b>RPL4</b>         | - | 5541  | 10.398 | 1764 | 3442 | 1204 | 2.857 | 1.515 | 0.023 | 1 |
| chr6  | 72124148  | 72130448  | <b>LINC00472</b>    | - | 6300  | 3.77   | 723  | 1411 | 494  | 2.856 | 1.514 | 0.031 | 1 |
| chr5  | 85913783  | 85916583  | <b>COX7C</b>        | + | 2800  | 3.247  | 277  | 540  | 189  | 2.854 | 1.513 | 0.056 | 1 |
| chr17 | 7571719   | 7590863   | <b>TP53</b>         | - | 19144 | 1.535  | 894  | 1742 | 611  | 2.851 | 1.511 | 0.029 | 1 |
| chrX  | 20004934  | 20007897  | <b>LOC729609</b>    | - | 2963  | 1.56   | 140  | 273  | 96   | 2.846 | 1.509 | 0.084 | 1 |
| chr3  | 186288466 | 186303589 | <b>DNAJB11</b>      | + | 15123 | 2.181  | 1007 | 1959 | 689  | 2.842 | 1.507 | 0.027 | 1 |
| chr7  | 56019610  | 56023033  | <b>MRPS17</b>       | + | 3423  | 1.166  | 122  | 238  | 83   | 2.842 | 1.507 | 0.081 | 1 |
| chr2  | 209100952 | 209119806 | <b>IDH1</b>         | - | 18854 | 1.353  | 772  | 1502 | 528  | 2.841 | 1.506 | 0.033 | 1 |
| chr2  | 37458773  | 37476303  | <b>C2orf56</b>      | + | 17530 | 1.255  | 678  | 1319 | 465  | 2.834 | 1.503 | 0.028 | 1 |
| chr14 | 20915206  | 20923267  | <b>OSGEP</b>        | - | 8061  | 1.553  | 380  | 739  | 260  | 2.834 | 1.503 | 0.049 | 1 |
| chr9  | 104237607 | 104249475 | <b>C9orf125</b>     | - | 11868 | 2.002  | 722  | 1403 | 495  | 2.832 | 1.502 | 0.033 | 1 |
| chr19 | 50431958  | 50437193  | <b>ATF5</b>         | + | 5235  | 2.96   | 468  | 910  | 321  | 2.832 | 1.502 | 0.046 | 1 |
| chr8  | 110346551 | 110358189 | <b>ENY2</b>         | + | 11638 | 3.44   | 1223 | 2375 | 839  | 2.83  | 1.501 | 0.026 | 1 |
| chr5  | 54824669  | 54830370  | <b>RNF138P1</b>     | - | 5701  | 2.54   | 443  | 861  | 304  | 2.829 | 1.501 | 0.041 | 1 |
| chrX  | 101854095 | 101859085 | <b>ARMCX5</b>       | + | 4990  | 1.234  | 189  | 367  | 129  | 2.826 | 1.499 | 0.066 | 1 |
| chr6  | 151773421 | 151791232 | <b>C6orf211</b>     | + | 17811 | 1.427  | 779  | 1512 | 535  | 2.824 | 1.498 | 0.029 | 1 |
| chr11 | 66104803  | 66112582  | <b>BRMS1</b>        | - | 7779  | 2.107  | 494  | 959  | 339  | 2.824 | 1.498 | 0.046 | 1 |
| chr11 | 6701615   | 6704632   | <b>MRPL17</b>       | - | 3017  | 3.032  | 276  | 536  | 190  | 2.818 | 1.495 | 0.064 | 1 |
| chr4  | 15683351  | 15692070  | <b>FAM200B</b>      | + | 8719  | 4.057  | 1094 | 2119 | 752  | 2.816 | 1.494 | 0.023 | 1 |
| chr13 | 103418462 | 103426149 | <b>C13orf27</b>     | - | 7687  | 1.503  | 353  | 684  | 243  | 2.815 | 1.493 | 0.05  | 1 |
| chrX  | 102611379 | 102613397 | <b>WBPS</b>         | + | 2018  | 7.022  | 433  | 839  | 298  | 2.814 | 1.493 | 0.043 | 1 |
| chr6  | 52529198  | 52533951  | <b>LOC730101</b>    | + | 4753  | 2.975  | 433  | 838  | 298  | 2.813 | 1.492 | 0.043 | 1 |
| chr9  | 130209952 | 130213711 | <b>RPL12</b>        | - | 3759  | 14.196 | 1619 | 3131 | 1114 | 2.809 | 1.49  | 0.03  | 1 |
| chr6  | 2833733   | 2842081   | <b>SERPINB1</b>     | - | 8348  | 3.312  | 847  | 1638 | 583  | 2.808 | 1.49  | 0.029 | 1 |
| chr1  | 32799439  | 32801834  | <b>MARCKSL1</b>     | - | 2395  | 2.548  | 182  | 352  | 125  | 2.807 | 1.489 | 0.092 | 1 |
| chr7  | 87834431  | 87856308  | <b>SRI</b>          | - | 21877 | 1.892  | 1265 | 2446 | 871  | 2.806 | 1.489 | 0.027 | 1 |
| chr3  | 111697827 | 111712210 | <b>ABHD10</b>       | + | 14383 | 1.939  | 859  | 1659 | 592  | 2.801 | 1.486 | 0.028 | 1 |
| chrX  | 135044230 | 135056134 | <b>MMGT1</b>        | - | 11904 | 1.706  | 620  | 1199 | 428  | 2.801 | 1.486 | 0.035 | 1 |

|       |           |           |              |   |       |        |      |      |      |       |       |       |   |
|-------|-----------|-----------|--------------|---|-------|--------|------|------|------|-------|-------|-------|---|
| chr1  | 247263263 | 247267674 | ZNF669       | - | 4411  | 3.422  | 459  | 887  | 316  | 2.801 | 1.486 | 0.046 | 1 |
| chr17 | 42253351  | 42264082  | C17orf65     | - | 10731 | 1.266  | 411  | 795  | 283  | 2.8   | 1.485 | 0.052 | 1 |
| chr17 | 48556189  | 48563336  | RSAD1        | + | 7147  | 1.236  | 265  | 512  | 183  | 2.797 | 1.484 | 0.072 | 1 |
| chr7  | 39606002  | 39612480  | YAE1D1       | + | 6478  | 2.329  | 465  | 898  | 321  | 2.795 | 1.483 | 0.038 | 1 |
| chr4  | 159630278 | 159644552 | PPID         | - | 14274 | 1.689  | 741  | 1430 | 512  | 2.793 | 1.482 | 0.031 | 1 |
| chr14 | 78174424  | 78183941  | SLIRP        | + | 9517  | 2.578  | 754  | 1452 | 522  | 2.783 | 1.476 | 0.031 | 1 |
| chr13 | 48611702  | 48621282  | NUD215       | + | 9580  | 1.595  | 466  | 897  | 322  | 2.782 | 1.476 | 0.046 | 1 |
| chr1  | 154521050 | 154531120 | UBE2Q1       | - | 10070 | 2.86   | 880  | 1693 | 609  | 2.78  | 1.475 | 0.032 | 1 |
| chr1  | 156692412 | 156697705 | ISG20L2      | - | 5293  | 2.907  | 468  | 900  | 323  | 2.78  | 1.475 | 0.048 | 1 |
| chr1  | 150255228 | 150259501 | C1orf51      | + | 4273  | 2.205  | 286  | 550  | 198  | 2.774 | 1.472 | 0.065 | 1 |
| chr12 | 57031958  | 57039852  | ATPSB        | - | 7894  | 8.232  | 1983 | 3810 | 1374 | 2.772 | 1.471 | 0.03  | 1 |
| chr19 | 17326154  | 17330638  | USE1         | + | 4484  | 1.315  | 179  | 343  | 124  | 2.772 | 1.471 | 0.084 | 1 |
| chr16 | 69151911  | 69166493  | CHTF8        | - | 14582 | 2.608  | 1166 | 2241 | 808  | 2.771 | 1.47  | 0.028 | 1 |
| chr6  | 30457182  | 30461982  | HLA-E        | + | 4800  | 9.043  | 1311 | 2517 | 909  | 2.769 | 1.469 | 0.034 | 1 |
| chr2  | 24300302  | 24308085  | TP53I3       | - | 7783  | 2.282  | 541  | 1039 | 375  | 2.766 | 1.468 | 0.044 | 1 |
| chr12 | 91497231  | 91505542  | LUM          | - | 8311  | 4.955  | 1256 | 2409 | 872  | 2.761 | 1.465 | 0.031 | 1 |
| chr6  | 31826828  | 31830709  | NEU1         | - | 3881  | 3.3    | 383  | 734  | 265  | 2.76  | 1.465 | 0.066 | 1 |
| chr11 | 75110561  | 75116733  | RPS3         | + | 6172  | 9.196  | 1736 | 3325 | 1206 | 2.757 | 1.463 | 0.03  | 1 |
| chrX  | 103217199 | 103220563 | TMSB15B      | + | 3364  | 1.086  | 112  | 216  | 78   | 2.755 | 1.462 | 0.093 | 1 |
| chr4  | 152020753 | 152025804 | RPS3A        | + | 5051  | 9.341  | 1445 | 2766 | 1004 | 2.753 | 1.461 | 0.03  | 1 |
| chr17 | 31254927  | 31268667  | TMEM98       | + | 13740 | 2.077  | 866  | 1657 | 602  | 2.75  | 1.46  | 0.037 | 1 |
| chr9  | 35658286  | 35661500  | CCDC107      | + | 3214  | 2.824  | 277  | 530  | 193  | 2.749 | 1.459 | 0.065 | 1 |
| chr10 | 60094738  | 60130513  | UBE2D1       | + | 35775 | 1.215  | 1331 | 2545 | 926  | 2.746 | 1.457 | 0.03  | 1 |
| chr16 | 89284110  | 89295965  | ZNF778       | + | 11855 | 1.236  | 443  | 846  | 308  | 2.741 | 1.455 | 0.057 | 1 |
| chr10 | 45496272  | 45500777  | ZNF22        | + | 4505  | 4.085  | 569  | 1086 | 396  | 2.741 | 1.454 | 0.037 | 1 |
| chr3  | 52570620  | 52574586  | C3orf78      | + | 3966  | 3.194  | 385  | 735  | 268  | 2.738 | 1.453 | 0.059 | 1 |
| chr16 | 69373414  | 69377013  | NIP7         | + | 3599  | 3.042  | 334  | 638  | 233  | 2.737 | 1.452 | 0.061 | 1 |
| chr9  | 104152248 | 104160919 | MRPL50       | - | 8671  | 1.293  | 344  | 657  | 240  | 2.736 | 1.452 | 0.056 | 1 |
| chr4  | 6642444   | 6644449   | MRFAP1       | + | 2005  | 12.218 | 747  | 1426 | 521  | 2.735 | 1.452 | 0.038 | 1 |
| chr16 | 89627064  | 89633237  | RPL13        | + | 6173  | 6.239  | 1171 | 2233 | 816  | 2.734 | 1.451 | 0.034 | 1 |
| chr11 | 118272103 | 118280562 | ATP5L        | + | 8459  | 3.616  | 935  | 1783 | 652  | 2.733 | 1.451 | 0.034 | 1 |
| chr8  | 38120649  | 38126738  | PPAPDC1B     | - | 6089  | 3.151  | 581  | 1108 | 405  | 2.733 | 1.451 | 0.048 | 1 |
| chr10 | 1085963   | 1095061   | IDI1         | - | 9098  | 3.185  | 879  | 1675 | 614  | 2.729 | 1.448 | 0.039 | 1 |
| chr2  | 3622852   | 3628509   | RPS7         | + | 5657  | 6.605  | 1148 | 2187 | 801  | 2.729 | 1.448 | 0.031 | 1 |
| chr6  | 32861952  | 32871535  | LOC100294145 | + | 9583  | 1.063  | 312  | 594  | 218  | 2.722 | 1.445 | 0.062 | 1 |
| chr12 | 44187525  | 44200178  | TWF1         | - | 12653 | 3.015  | 1175 | 2235 | 822  | 2.72  | 1.443 | 0.03  | 1 |
| chr2  | 73956956  | 73964517  | TPRKB        | - | 7561  | 1.224  | 285  | 543  | 199  | 2.719 | 1.443 | 0.061 | 1 |
| chr6  | 42174538  | 42185633  | MRPS10       | - | 11095 | 2.011  | 687  | 1305 | 481  | 2.713 | 1.44  | 0.037 | 1 |
| chr1  | 85715636  | 85725355  | C1orf52      | - | 9719  | 3.78   | 1134 | 2153 | 794  | 2.711 | 1.439 | 0.03  | 1 |
| chr11 | 9481102   | 9482245   | LOC644656    | - | 1143  | 4.234  | 147  | 280  | 103  | 2.71  | 1.438 | 0.097 | 1 |
| chr4  | 84377117  | 84382929  | MRPS18C      | + | 5812  | 2.65   | 481  | 913  | 337  | 2.707 | 1.437 | 0.039 | 1 |
| chr1  | 28562601  | 28564616  | ATPIF1       | + | 2015  | 6.627  | 406  | 770  | 285  | 2.697 | 1.431 | 0.06  | 1 |
| chr6  | 43021766  | 43027242  | MRPL2        | - | 5476  | 1.783  | 299  | 566  | 210  | 2.692 | 1.429 | 0.067 | 1 |
| chr19 | 2269519   | 2273487   | OAZ1         | + | 3968  | 10.23  | 1227 | 2322 | 862  | 2.692 | 1.429 | 0.04  | 1 |
| chr8  | 102209265 | 102217960 | ZNF706       | - | 8695  | 3.265  | 880  | 1663 | 619  | 2.687 | 1.426 | 0.033 | 1 |
| chr6  | 111279762 | 111289091 | GNF3C6       | + | 9329  | 2.066  | 591  | 1116 | 415  | 2.686 | 1.425 | 0.046 | 1 |
| chr9  | 139619045 | 139622636 | SNHG7        | - | 3591  | 6.551  | 716  | 1353 | 504  | 2.685 | 1.425 | 0.046 | 1 |
| chr9  | 125580375 | 125590935 | PDLC         | - | 10560 | 2.274  | 732  | 1383 | 515  | 2.684 | 1.424 | 0.045 | 1 |
| chr10 | 99186026  | 99193198  | PGAM1        | + | 7172  | 2.859  | 628  | 1186 | 442  | 2.682 | 1.423 | 0.046 | 1 |
| chr11 | 22644078  | 22647387  | FANCF        | - | 3309  | 1.46   | 146  | 276  | 102  | 2.682 | 1.424 | 0.108 | 0 |
| chr1  | 46153846  | 46160108  | TMEM69       | + | 6262  | 1.447  | 278  | 525  | 196  | 2.68  | 1.422 | 0.069 | 1 |
| chr20 | 52824501  | 52836492  | PF3D4        | + | 11991 | 2.276  | 839  | 1583 | 590  | 2.679 | 1.422 | 0.037 | 1 |
| chr11 | 116649275 | 116658739 | ZNF259       | - | 9464  | 2.876  | 828  | 1562 | 583  | 2.679 | 1.422 | 0.044 | 1 |
| chr8  | 86126287  | 86132643  | C8orf59      | - | 6356  | 3.058  | 592  | 1118 | 417  | 2.677 | 1.421 | 0.05  | 1 |
| chr11 | 57425215  | 57429337  | CLP1         | + | 4122  | 1.623  | 202  | 382  | 143  | 2.675 | 1.419 | 0.094 | 1 |
| chr9  | 19115758  | 19127604  | PLIN2        | - | 11846 | 2.878  | 1050 | 1980 | 740  | 2.674 | 1.419 | 0.034 | 1 |
| chr7  | 27236498  | 27239725  | HOXA13       | - | 3227  | 5.394  | 532  | 1003 | 375  | 2.674 | 1.419 | 0.052 | 1 |
| chr9  | 33252469  | 33264759  | BAG1         | - | 12290 | 2.13   | 795  | 1499 | 560  | 2.673 | 1.419 | 0.046 | 1 |
| chr16 | 67188088  | 67193812  | TRADD        | - | 5724  | 1.08   | 187  | 354  | 132  | 2.673 | 1.419 | 0.094 | 1 |
| chr1  | 45976706  | 45988562  | PRDX1        | - | 11856 | 6.78   | 2472 | 4658 | 1743 | 2.671 | 1.418 | 0.035 | 1 |
| chr19 | 36236493  | 36237903  | PSENEN       | + | 1410  | 2.448  | 104  | 196  | 73   | 2.671 | 1.417 | 0.134 | 0 |
| chr5  | 33987090  | 34008220  | AMACR        | - | 21130 | 1.948  | 1267 | 2387 | 894  | 2.67  | 1.417 | 0.033 | 1 |
| chr15 | 55473511  | 55489231  | RSL24D1      | - | 15720 | 2.877  | 1389 | 2614 | 981  | 2.663 | 1.413 | 0.035 | 1 |
| chr5  | 149372685 | 149380730 | TIGD6        | - | 8045  | 1.368  | 334  | 628  | 236  | 2.663 | 1.413 | 0.073 | 1 |
| chr11 | 94227152  | 94232744  | ANKRD49      | + | 5592  | 2.38   | 410  | 771  | 290  | 2.659 | 1.411 | 0.056 | 1 |
| chr21 | 35275756  | 35288158  | ATP5O        | - | 12402 | 2.247  | 853  | 1603 | 603  | 2.658 | 1.411 | 0.042 | 1 |
| chr1  | 193065594 | 193075244 | GLRX2        | - | 9650  | 2.101  | 617  | 1159 | 437  | 2.653 | 1.408 | 0.053 | 1 |
| chr5  | 72794249  | 72801448  | BTF3         | + | 7199  | 5.439  | 1215 | 2281 | 860  | 2.653 | 1.407 | 0.032 | 1 |
| chr19 | 58452200  | 58459077  | ZNF256       | - | 6877  | 2.039  | 426  | 800  | 301  | 2.65  | 1.406 | 0.065 | 1 |
| chr11 | 118886421 | 118889057 | RPS25        | - | 2636  | 6.475  | 524  | 983  | 371  | 2.65  | 1.406 | 0.053 | 1 |
| chr17 | 77768175  | 77770915  | CBX8         | - | 2740  | 1.685  | 139  | 261  | 98   | 2.647 | 1.404 | 0.12  | 0 |

|       |           |           |                 |   |       |        |      |      |      |       |       |       |   |
|-------|-----------|-----------|-----------------|---|-------|--------|------|------|------|-------|-------|-------|---|
| chr17 | 73131343  | 73150775  | <b>HN1</b>      | - | 19432 | 5.091  | 3018 | 5659 | 2138 | 2.646 | 1.404 | 0.045 | 1 |
| chrX  | 102631267 | 102633001 | <b>NGFRAP1</b>  | + | 1734  | 5.057  | 268  | 502  | 189  | 2.645 | 1.404 | 0.079 | 1 |
| chr12 | 112277572 | 112280706 | <b>C12orf47</b> | - | 3134  | 1.32   | 126  | 236  | 89   | 2.644 | 1.403 | 0.116 | 0 |
| chr17 | 48939586  | 48945339  | <b>TOB1</b>     | - | 5753  | 7.71   | 1350 | 2529 | 957  | 2.641 | 1.401 | 0.042 | 1 |
| chr12 | 53835432  | 53840427  | <b>PRR13</b>    | + | 4995  | 3.386  | 516  | 967  | 366  | 2.641 | 1.401 | 0.057 | 1 |
| chr11 | 111955538 | 111957522 | <b>TIMM8B</b>   | - | 1984  | 1.41   | 85   | 160  | 60   | 2.639 | 1.4   | 0.134 | 0 |
| chr17 | 73034954  | 73043074  | <b>ATP5H</b>    | - | 8120  | 3.108  | 767  | 1434 | 544  | 2.633 | 1.397 | 0.051 | 1 |
| chr12 | 105380097 | 105388505 | <b>C12orf45</b> | + | 8408  | 1.437  | 369  | 691  | 262  | 2.632 | 1.396 | 0.068 | 1 |
| chr5  | 139712427 | 139726188 | <b>HBEGF</b>    | - | 13761 | 1.565  | 654  | 1222 | 464  | 2.629 | 1.395 | 0.056 | 1 |
| chrX  | 151995870 | 151999301 | <b>CETN2</b>    | + | 3431  | 1.282  | 134  | 252  | 95   | 2.628 | 1.394 | 0.111 | 0 |
| chr10 | 22610138  | 22620414  | <b>BMI1</b>     | - | 10276 | 1.421  | 447  | 835  | 318  | 2.627 | 1.393 | 0.062 | 1 |
| chr6  | 42989384  | 42997337  | <b>RRP36</b>    | + | 7953  | 2.32   | 567  | 1059 | 403  | 2.624 | 1.392 | 0.052 | 1 |
| chr6  | 90341942  | 90348474  | <b>LYRM2</b>    | - | 6532  | 1.567  | 316  | 590  | 224  | 2.623 | 1.391 | 0.068 | 1 |
| chr6  | 13615558  | 13621127  | <b>NOL7</b>     | + | 5569  | 4.508  | 768  | 1434 | 546  | 2.623 | 1.391 | 0.047 | 1 |
| chr5  | 150070351 | 150080669 | <b>BMM22</b>    | - | 10318 | 3.258  | 1032 | 1923 | 735  | 2.616 | 1.387 | 0.042 | 1 |
| chr7  | 56169265  | 56174187  | <b>CHCHD2</b>   | - | 4922  | 3.433  | 515  | 960  | 367  | 2.615 | 1.387 | 0.061 | 1 |
| chr6  | 71998476  | 72011973  | <b>OGFRL1</b>   | + | 13497 | 3.016  | 1259 | 2345 | 897  | 2.614 | 1.386 | 0.036 | 1 |
| chr16 | 81069457  | 81080951  | <b>ATMIN</b>    | + | 11494 | 1.423  | 499  | 928  | 355  | 2.611 | 1.385 | 0.063 | 1 |
| chr12 | 96252708  | 96260238  | <b>SNRPF</b>    | + | 7530  | 3.634  | 842  | 1567 | 600  | 2.61  | 1.384 | 0.044 | 1 |
| chr10 | 99092253  | 99094458  | <b>FRAT2</b>    | - | 2205  | 1.209  | 80   | 149  | 57   | 2.6   | 1.379 | 0.166 | 0 |
| chr6  | 26421618  | 26430816  | <b>BTN2A3P</b>  | + | 9198  | 1.326  | 374  | 695  | 267  | 2.596 | 1.377 | 0.07  | 1 |
| chr11 | 111957570 | 111966518 | <b>SDHD</b>     | + | 8948  | 2.488  | 682  | 1266 | 488  | 2.595 | 1.375 | 0.053 | 1 |
| chr1  | 109606997 | 109618624 | <b>TAF13</b>    | - | 11627 | 4.239  | 1518 | 2814 | 1086 | 2.592 | 1.374 | 0.04  | 1 |
| chr20 | 16710608  | 16722417  | <b>SNRPB2</b>   | + | 11809 | 2.73   | 993  | 1841 | 710  | 2.591 | 1.374 | 0.043 | 1 |
| chr9  | 7796490   | 7799799   | <b>C9orf123</b> | - | 3309  | 1.577  | 157  | 291  | 112  | 2.59  | 1.373 | 0.125 | 0 |
| chr12 | 54378945  | 54384062  | <b>HOXC10</b>   | + | 5117  | 1.977  | 308  | 572  | 220  | 2.589 | 1.372 | 0.084 | 1 |
| chr5  | 7859271   | 7869150   | <b>FASKD3</b>   | - | 9879  | 1.733  | 524  | 970  | 375  | 2.588 | 1.372 | 0.062 | 1 |
| chr6  | 75947390  | 75953644  | <b>COX7A2</b>   | - | 6254  | 3.907  | 750  | 1390 | 537  | 2.588 | 1.372 | 0.05  | 1 |
| chr5  | 132202318 | 132204536 | <b>UQCRCQ</b>   | + | 2218  | 4.082  | 276  | 511  | 197  | 2.586 | 1.371 | 0.09  | 1 |
| chr5  | 141018868 | 141030986 | <b>FCHSD1</b>   | - | 12118 | 2.522  | 933  | 1727 | 668  | 2.583 | 1.369 | 0.05  | 1 |
| chr4  | 184560788 | 184580331 | <b>RWDD4</b>    | - | 19543 | 1.08   | 647  | 1197 | 463  | 2.582 | 1.369 | 0.056 | 1 |
| chr19 | 49990864  | 49995564  | <b>RPL13A</b>   | + | 4700  | 16.023 | 2292 | 4242 | 1642 | 2.582 | 1.369 | 0.05  | 1 |
| chr2  | 27293341  | 27294567  | <b>OST4</b>     | - | 1226  | 12.834 | 477  | 883  | 342  | 2.582 | 1.368 | 0.072 | 1 |
| chr5  | 68513572  | 68525985  | <b>MRPS36</b>   | + | 12413 | 1.253  | 479  | 886  | 343  | 2.579 | 1.367 | 0.061 | 1 |
| chr2  | 128603839 | 128615729 | <b>POLR2D</b>   | - | 11890 | 2.011  | 732  | 1355 | 525  | 2.579 | 1.367 | 0.053 | 1 |
| chr15 | 101811213 | 101817700 | <b>SELS</b>     | - | 6487  | 5.484  | 1092 | 2019 | 783  | 2.578 | 1.366 | 0.045 | 1 |
| chr6  | 43484776  | 43489246  | <b>POLR1C</b>   | + | 4470  | 2.712  | 371  | 686  | 266  | 2.578 | 1.366 | 0.075 | 1 |
| chr8  | 40010986  | 40012827  | <b>C8orf4</b>   | + | 1841  | 8.92   | 507  | 938  | 363  | 2.578 | 1.367 | 0.058 | 1 |
| chr15 | 45694518  | 45713616  | <b>SPATASL1</b> | + | 19098 | 1.297  | 758  | 1399 | 544  | 2.569 | 1.361 | 0.054 | 1 |
| chr6  | 26087508  | 26095469  | <b>HFE</b>      | + | 7961  | 1.223  | 299  | 553  | 215  | 2.567 | 1.36  | 0.082 | 1 |
| chr8  | 118532964 | 118552501 | <b>MED30</b>    | + | 19537 | 1.424  | 855  | 1576 | 614  | 2.565 | 1.359 | 0.05  | 1 |
| chr16 | 18794276  | 18801656  | <b>RPS15A</b>   | - | 7380  | 8.229  | 1867 | 3442 | 1342 | 2.565 | 1.359 | 0.045 | 1 |
| chr1  | 152004981 | 152009511 | <b>S100A11</b>  | - | 4530  | 19.212 | 2655 | 4891 | 1909 | 2.562 | 1.357 | 0.053 | 1 |
| chr6  | 133135707 | 133138703 | <b>RPS12</b>    | + | 2996  | 27.713 | 2547 | 4693 | 1832 | 2.561 | 1.357 | 0.049 | 1 |
| chr11 | 47586981  | 47595013  | <b>PTPMT1</b>   | + | 8032  | 1.849  | 455  | 837  | 327  | 2.558 | 1.355 | 0.07  | 1 |
| chr17 | 26655352  | 26662495  | <b>IFT20</b>    | - | 7143  | 2.597  | 564  | 1039 | 406  | 2.558 | 1.355 | 0.067 | 1 |
| chr5  | 162864576 | 162872022 | <b>CNG1</b>     | + | 7446  | 9.804  | 2250 | 4135 | 1621 | 2.551 | 1.351 | 0.046 | 1 |
| chr2  | 241499470 | 241503431 | <b>DUSP28</b>   | + | 3961  | 1.109  | 133  | 244  | 95   | 2.55  | 1.35  | 0.139 | 0 |
| chr2  | 27651472  | 27665124  | <b>NRBP1</b>    | + | 13652 | 4.177  | 1747 | 3210 | 1259 | 2.549 | 1.35  | 0.048 | 1 |
| chr16 | 83841592  | 83846594  | <b>HSBP1</b>    | + | 5002  | 3.463  | 533  | 979  | 384  | 2.549 | 1.35  | 0.063 | 1 |
| chr2  | 152104727 | 152118389 | <b>RBM43</b>    | - | 13662 | 1.357  | 570  | 1048 | 411  | 2.547 | 1.349 | 0.061 | 1 |
| chrX  | 119384606 | 119392251 | <b>ZBTB33</b>   | + | 7645  | 1.802  | 422  | 776  | 304  | 2.547 | 1.349 | 0.073 | 1 |
| chr17 | 7138346   | 7142825   | <b>PHF23</b>    | - | 4479  | 3.363  | 462  | 849  | 333  | 2.547 | 1.349 | 0.07  | 1 |
| chr19 | 35168566  | 35177302  | <b>ZNF302</b>   | + | 8736  | 2.49   | 664  | 1220 | 479  | 2.545 | 1.347 | 0.061 | 1 |
| chr1  | 161719580 | 161726952 | <b>DUSP12</b>   | + | 7372  | 3.726  | 848  | 1557 | 612  | 2.544 | 1.347 | 0.049 | 1 |
| chr20 | 45313003  | 45318276  | <b>TP53RK</b>   | - | 5273  | 3.811  | 612  | 1123 | 441  | 2.543 | 1.347 | 0.066 | 1 |
| chr10 | 126085871 | 126107545 | <b>OAT</b>      | - | 21674 | 3.146  | 2085 | 3826 | 1505 | 2.541 | 1.345 | 0.052 | 1 |
| chr22 | 31500762  | 31503551  | <b>SELM</b>     | - | 2789  | 7.51   | 632  | 1157 | 456  | 2.535 | 1.342 | 0.073 | 1 |
| chr19 | 58038692  | 58052244  | <b>ZNF549</b>   | + | 13552 | 1.368  | 566  | 1036 | 409  | 2.534 | 1.341 | 0.068 | 1 |
| chr14 | 21927178  | 21945132  | <b>RAB2B</b>    | - | 17954 | 1.727  | 951  | 1740 | 688  | 2.528 | 1.338 | 0.054 | 1 |
| chr1  | 157094458 | 157108383 | <b>ETV3</b>     | - | 13925 | 3.545  | 1517 | 2776 | 1098 | 2.528 | 1.338 | 0.048 | 1 |
| chr17 | 7143737   | 7145753   | <b>GABARAP</b>  | + | 2016  | 6.483  | 395  | 723  | 286  | 2.527 | 1.338 | 0.091 | 1 |
| chr4  | 78078356  | 78091213  | <b>CNG2</b>     | + | 12857 | 4.09   | 1601 | 2927 | 1159 | 2.525 | 1.336 | 0.056 | 1 |
| chr10 | 105148808 | 105156270 | <b>USMG5</b>    | - | 7462  | 2.493  | 571  | 1043 | 413  | 2.522 | 1.335 | 0.065 | 1 |
| chr10 | 45471708  | 45474330  | <b>C10orf10</b> | - | 2622  | 2.736  | 216  | 396  | 157  | 2.521 | 1.334 | 0.121 | 0 |
| chr3  | 4344987   | 4358949   | <b>SETMAR</b>   | + | 13962 | 1.153  | 493  | 901  | 357  | 2.519 | 1.333 | 0.072 | 1 |
| chr6  | 34845554  | 34855819  | <b>TAF11</b>    | - | 10265 | 2.224  | 704  | 1286 | 510  | 2.518 | 1.332 | 0.057 | 1 |
| chr13 | 31032878  | 31040081  | <b>HMGB1</b>    | - | 7203  | 3.516  | 780  | 1423 | 565  | 2.517 | 1.332 | 0.056 | 1 |
| chr12 | 49578582  | 49582861  | <b>TUBA1A</b>   | - | 4279  | 10.324 | 1349 | 2462 | 978  | 2.516 | 1.331 | 0.054 | 1 |
| chr4  | 103998781 | 104021024 | <b>BDH2</b>     | - | 22243 | 1.312  | 896  | 1633 | 650  | 2.51  | 1.328 | 0.056 | 1 |
| chr19 | 57862644  | 57871265  | <b>ZNF304</b>   | + | 8621  | 2.838  | 742  | 1352 | 538  | 2.51  | 1.328 | 0.068 | 1 |

|       |           |           |                      |   |       |        |      |      |      |       |       |       |   |
|-------|-----------|-----------|----------------------|---|-------|--------|------|------|------|-------|-------|-------|---|
| chr12 | 82746082  | 82752584  | <b>CCDC59</b>        | - | 6502  | 3.795  | 761  | 1386 | 552  | 2.509 | 1.327 | 0.057 | 1 |
| chr1  | 39491966  | 39500308  | <b>NDUF55</b>        | + | 8342  | 2.3    | 590  | 1074 | 429  | 2.505 | 1.325 | 0.065 | 1 |
| chr13 | 26786904  | 26796508  | <b>RNF6</b>          | - | 9604  | 5.06   | 1493 | 2717 | 1085 | 2.504 | 1.324 | 0.052 | 1 |
| chr7  | 99752042  | 99756302  | <b>C7orf43</b>       | - | 4260  | 1.304  | 168  | 307  | 122  | 2.504 | 1.324 | 0.134 | 0 |
| chr6  | 10695187  | 10709970  | <b>PAK1IP1</b>       | + | 14783 | 1.43   | 654  | 1189 | 476  | 2.499 | 1.321 | 0.06  | 1 |
| chr14 | 104378624 | 104387903 | <b>C14orf2</b>       | - | 9279  | 2.664  | 755  | 1373 | 549  | 2.498 | 1.321 | 0.065 | 1 |
| chr17 | 61896792  | 61905531  | <b>FTSJ3</b>         | - | 8239  | 1.87   | 471  | 855  | 343  | 2.494 | 1.318 | 0.079 | 1 |
| chr14 | 45366506  | 45376460  | <b>C14orf28</b>      | + | 9954  | 1.523  | 464  | 843  | 338  | 2.49  | 1.316 | 0.079 | 1 |
| chr16 | 19513014  | 19533450  | <b>GDE1</b>          | - | 20436 | 1.417  | 889  | 1610 | 648  | 2.483 | 1.312 | 0.06  | 1 |
| chr5  | 114948904 | 114961876 | <b>TMED7</b>         | - | 12972 | 5.984  | 2402 | 4350 | 1752 | 2.482 | 1.311 | 0.053 | 1 |
| chr7  | 43906156  | 43909145  | <b>MRPS24</b>        | - | 2989  | 4.432  | 406  | 735  | 296  | 2.479 | 1.31  | 0.086 | 1 |
| chr3  | 169482397 | 169482848 | <b>TERC</b>          | - | 451   | 2.016  | 27   | 48   | 19   | 2.477 | 1.309 | 0.285 | 0 |
| chr3  | 57541980  | 57547768  | <b>PDE12</b>         | + | 5788  | 2.928  | 515  | 932  | 376  | 2.476 | 1.308 | 0.084 | 1 |
| chr5  | 176728198 | 176730744 | <b>RAB24</b>         | - | 2546  | 1.335  | 102  | 185  | 74   | 2.476 | 1.308 | 0.178 | 0 |
| chr1  | 111991742 | 112004525 | <b>ATP5F1</b>        | + | 12783 | 3.429  | 1356 | 2451 | 991  | 2.473 | 1.306 | 0.052 | 1 |
| chr12 | 56510373  | 56511616  | <b>RPL41</b>         | + | 1243  | 9.999  | 385  | 697  | 282  | 2.473 | 1.306 | 0.079 | 1 |
| chr9  | 107509968 | 107522403 | <b>NIPSNAP3A</b>     | + | 12435 | 3.246  | 1251 | 2261 | 915  | 2.472 | 1.306 | 0.051 | 1 |
| chr2  | 73989324  | 74007284  | <b>DUSP11</b>        | - | 17960 | 2.553  | 1417 | 2559 | 1036 | 2.469 | 1.304 | 0.053 | 1 |
| chr11 | 62619459  | 62623360  | <b>SNHG1</b>         | - | 3901  | 21.167 | 2519 | 4549 | 1842 | 2.468 | 1.304 | 0.064 | 1 |
| chr1  | 42922172  | 42926086  | <b>PPCS</b>          | + | 3914  | 3.804  | 456  | 824  | 334  | 2.465 | 1.302 | 0.083 | 1 |
| chr18 | 33552587  | 33559250  | <b>C18orf21</b>      | + | 6663  | 4.078  | 836  | 1509 | 612  | 2.464 | 1.301 | 0.062 | 1 |
| chr8  | 74202873  | 74205869  | <b>RPL7</b>          | - | 2996  | 8.066  | 745  | 1343 | 545  | 2.462 | 1.3   | 0.064 | 1 |
| chr2  | 237994083 | 238007489 | <b>COPS8</b>         | + | 13406 | 3.352  | 1384 | 2495 | 1014 | 2.46  | 1.298 | 0.056 | 1 |
| chr13 | 114567149 | 114569805 | <b>LOC100506394</b>  | + | 2656  | 1.433  | 117  | 210  | 85   | 2.46  | 1.299 | 0.149 | 0 |
| chr9  | 33624222  | 33625532  | <b>ANXA2P2</b>       | + | 1310  | 20.547 | 836  | 1506 | 612  | 2.459 | 1.298 | 0.057 | 1 |
| chr7  | 77313167  | 77326662  | <b>LOC100505854</b>  | - | 13495 | 1.244  | 519  | 934  | 380  | 2.456 | 1.296 | 0.073 | 1 |
| chr18 | 77724581  | 77730822  | <b>HSBP1L1</b>       | + | 6241  | 2.178  | 415  | 748  | 305  | 2.455 | 1.296 | 0.092 | 1 |
| chr11 | 114271383 | 114279635 | <b>RBM7</b>          | + | 8252  | 5.961  | 1524 | 2742 | 1118 | 2.451 | 1.293 | 0.053 | 1 |
| chr1  | 202909960 | 202927700 | <b>ADIPOR1</b>       | - | 17740 | 2.452  | 1335 | 2400 | 979  | 2.45  | 1.293 | 0.06  | 1 |
| chr1  | 109633402 | 109639554 | <b>TMEM167B</b>      | + | 6152  | 4.336  | 823  | 1479 | 604  | 2.448 | 1.292 | 0.063 | 1 |
| chr6  | 42981840  | 42989036  | <b>KLHDC3</b>        | + | 7196  | 3.21   | 704  | 1265 | 517  | 2.447 | 1.291 | 0.075 | 1 |
| chr6  | 83903031  | 83906256  | <b>RWDD2A</b>        | + | 3225  | 1.601  | 159  | 286  | 117  | 2.447 | 1.291 | 0.133 | 0 |
| chr7  | 99746529  | 99751833  | <b>C7orf59</b>       | + | 5304  | 2.001  | 323  | 581  | 237  | 2.445 | 1.29  | 0.107 | 0 |
| chr4  | 17578926  | 17609590  | <b>LAP3</b>          | + | 30664 | 1.175  | 1094 | 1964 | 804  | 2.442 | 1.288 | 0.07  | 1 |
| chr17 | 10600926  | 10614875  | <b>C17orf48</b>      | + | 13949 | 3.042  | 1330 | 2387 | 978  | 2.44  | 1.287 | 0.047 | 1 |
| chr9  | 37588411  | 37592636  | <b>TOMM5</b>         | - | 4225  | 3.179  | 413  | 741  | 303  | 2.439 | 1.286 | 0.091 | 1 |
| chr14 | 75519927  | 75530736  | <b>ACYP1</b>         | - | 10809 | 1.041  | 343  | 616  | 252  | 2.438 | 1.286 | 0.104 | 0 |
| chr11 | 27515964  | 27528326  | <b>LIN7C</b>         | - | 12362 | 3.158  | 1209 | 2168 | 889  | 2.437 | 1.285 | 0.056 | 1 |
| chr7  | 5632435   | 5646287   | <b>FSCN1</b>         | + | 13852 | 3.684  | 1546 | 2772 | 1137 | 2.436 | 1.284 | 0.071 | 1 |
| chr5  | 40831429  | 40835387  | <b>RPL37</b>         | - | 3958  | 13.93  | 1699 | 3043 | 1251 | 2.432 | 1.282 | 0.06  | 1 |
| chr1  | 156561557 | 156564091 | <b>APOA1BP</b>       | + | 2534  | 1.797  | 138  | 247  | 101  | 2.429 | 1.28  | 0.164 | 0 |
| chrX  | 119004494 | 119005791 | <b>RNF113A</b>       | - | 1297  | 1.432  | 56   | 101  | 41   | 2.429 | 1.281 | 0.215 | 0 |
| chr3  | 196662272 | 196669464 | <b>NCBP2</b>         | - | 7192  | 2.872  | 633  | 1133 | 467  | 2.428 | 1.28  | 0.077 | 1 |
| chr11 | 62327072  | 62341460  | <b>EEF1G</b>         | - | 14388 | 2.782  | 1234 | 2208 | 910  | 2.427 | 1.279 | 0.06  | 1 |
| chr10 | 102737578 | 102747272 | <b>MRPL43</b>        | - | 9694  | 1.072  | 317  | 566  | 233  | 2.426 | 1.278 | 0.112 | 0 |
| chr17 | 40811265  | 40819024  | <b>TUBG2</b>         | + | 7759  | 1.264  | 302  | 540  | 222  | 2.424 | 1.278 | 0.105 | 0 |
| chr6  | 33378772  | 33384230  | <b>PHF1</b>          | + | 5458  | 2.87   | 476  | 851  | 351  | 2.424 | 1.277 | 0.096 | 1 |
| chr6  | 121756744 | 121770873 | <b>GJA1</b>          | + | 14129 | 1.61   | 705  | 1259 | 520  | 2.423 | 1.277 | 0.067 | 1 |
| chr14 | 59939405  | 59951073  | <b>C14orf149</b>     | - | 11668 | 2.958  | 1068 | 1910 | 788  | 2.423 | 1.277 | 0.06  | 1 |
| chr11 | 105878628 | 105892954 | <b>KIAA1826</b>      | - | 14326 | 1.591  | 701  | 1253 | 517  | 2.421 | 1.275 | 0.072 | 1 |
| chr5  | 151122382 | 151138210 | <b>ATOX1</b>         | - | 15828 | 2.413  | 1166 | 2081 | 861  | 2.417 | 1.273 | 0.069 | 1 |
| chr16 | 75681634  | 75691341  | <b>TERF2IP</b>       | + | 9707  | 4.63   | 1388 | 2477 | 1025 | 2.416 | 1.272 | 0.06  | 1 |
| chrX  | 135228860 | 135293518 | <b>FHL1</b>          | + | 14000 | 1.851  | 3757 | 6700 | 2776 | 2.414 | 1.271 | 0.06  | 1 |
| chr11 | 61731756  | 61735132  | <b>FTH1</b>          | - | 3376  | 21.581 | 2199 | 3921 | 1625 | 2.413 | 1.271 | 0.08  | 1 |
| chr12 | 27175482  | 27182682  | <b>MED21</b>         | + | 7200  | 3.071  | 681  | 1214 | 503  | 2.412 | 1.27  | 0.073 | 1 |
| chr17 | 26873724  | 26879646  | <b>UNC119</b>        | - | 5922  | 1.55   | 279  | 497  | 206  | 2.412 | 1.27  | 0.126 | 0 |
| chr11 | 94800055  | 94804388  | <b>SRSF8</b>         | + | 4333  | 1.672  | 219  | 391  | 162  | 2.412 | 1.27  | 0.139 | 0 |
| chr3  | 52232115  | 52248343  | <b>ALAS1</b>         | + | 16228 | 1.849  | 920  | 1640 | 680  | 2.41  | 1.269 | 0.07  | 1 |
| chr7  | 99090853  | 99097877  | <b>ZNF394</b>        | - | 7024  | 2.464  | 529  | 943  | 391  | 2.409 | 1.269 | 0.09  | 1 |
| chr9  | 116135697 | 116138341 | <b>HDHD3</b>         | - | 2644  | 1.801  | 144  | 257  | 106  | 2.409 | 1.268 | 0.165 | 0 |
| chr5  | 80597401  | 80608965  | <b>ZCCHC9</b>        | + | 11564 | 2.713  | 969  | 1725 | 717  | 2.407 | 1.267 | 0.065 | 1 |
| chr7  | 12250847  | 12276890  | <b>TMEM106B</b>      | + | 26043 | 1.77   | 1430 | 2547 | 1058 | 2.406 | 1.267 | 0.058 | 1 |
| chr1  | 85731459  | 85742587  | <b>BCL10</b>         | - | 11128 | 4.723  | 1621 | 2886 | 1199 | 2.406 | 1.267 | 0.062 | 1 |
| chr11 | 118889240 | 118894385 | <b>TRAPPC4</b>       | + | 5145  | 2.191  | 345  | 613  | 255  | 2.398 | 1.262 | 0.111 | 0 |
| chr7  | 12726451  | 12730558  | <b>ARL4A</b>         | + | 4107  | 1.145  | 145  | 258  | 107  | 2.397 | 1.261 | 0.143 | 0 |
| chr4  | 100799494 | 100815703 | <b>LAMTOR3</b>       | - | 16209 | 2.642  | 1320 | 2344 | 979  | 2.395 | 1.26  | 0.065 | 1 |
| chr15 | 65293849  | 65321977  | <b>MTFMT</b>         | - | 28128 | 1.155  | 1002 | 1778 | 743  | 2.392 | 1.258 | 0.067 | 1 |
| chr12 | 42705887  | 42719932  | <b>ZCRB1</b>         | - | 14045 | 1.2    | 518  | 920  | 384  | 2.391 | 1.258 | 0.089 | 1 |
| chr4  | 153457415 | 153460415 | <b>DKFZP434I0714</b> | + | 3000  | 2.26   | 207  | 368  | 154  | 2.39  | 1.257 | 0.137 | 0 |
| chr20 | 2633177   | 2639039   | <b>NOP56</b>         | + | 5862  | 6.892  | 1231 | 2182 | 914  | 2.387 | 1.255 | 0.074 | 1 |
| chr6  | 10723147  | 10731362  | <b>TMEM14C</b>       | + | 8215  | 2.68   | 675  | 1195 | 501  | 2.384 | 1.254 | 0.084 | 1 |

|       |           |           |              |   |       |        |      |      |      |       |       |       |   |
|-------|-----------|-----------|--------------|---|-------|--------|------|------|------|-------|-------|-------|---|
| chrX  | 62567106  | 62571218  | SPIN4        | - | 4112  | 1.812  | 229  | 406  | 170  | 2.384 | 1.253 | 0.129 | 0 |
| chr6  | 33176285  | 33180499  | RING1        | + | 4214  | 4.092  | 529  | 937  | 393  | 2.383 | 1.253 | 0.092 | 1 |
| chr12 | 124069075 | 124082688 | TMGED2       | + | 13613 | 4.427  | 1862 | 3296 | 1384 | 2.381 | 1.252 | 0.065 | 1 |
| chr1  | 3541555   | 3546694   | TPRG1L       | + | 5139  | 1.505  | 234  | 415  | 174  | 2.38  | 1.251 | 0.144 | 0 |
| chr1  | 46769379  | 46782447  | UQCRH        | + | 13068 | 2.001  | 806  | 1426 | 599  | 2.378 | 1.249 | 0.074 | 1 |
| chr1  | 151032150 | 151040973 | MLLT11       | + | 8823  | 1.215  | 333  | 590  | 248  | 2.377 | 1.249 | 0.099 | 1 |
| chr4  | 109571740 | 109588980 | OSTC         | + | 17240 | 2.749  | 1473 | 2605 | 1096 | 2.376 | 1.249 | 0.061 | 1 |
| chr7  | 27220775  | 27224835  | HOXA11       | - | 4060  | 4.544  | 557  | 985  | 414  | 2.376 | 1.249 | 0.105 | 0 |
| chr5  | 134074169 | 134087850 | CAMLG1       | + | 13681 | 1.537  | 645  | 1140 | 480  | 2.375 | 1.248 | 0.086 | 1 |
| chr13 | 115079964 | 115092803 | CHAMP1       | + | 12839 | 4.765  | 1893 | 3344 | 1409 | 2.373 | 1.247 | 0.065 | 1 |
| chr22 | 24083771  | 24093279  | ZNF70        | - | 9508  | 1.1    | 320  | 566  | 238  | 2.373 | 1.247 | 0.117 | 0 |
| chr3  | 137879829 | 137893791 | DBR1         | - | 13962 | 1.56   | 670  | 1184 | 499  | 2.372 | 1.246 | 0.083 | 1 |
| chr14 | 74946642  | 74960084  | NPC2         | - | 13442 | 2.47   | 1003 | 1771 | 746  | 2.372 | 1.246 | 0.088 | 1 |
| chr12 | 6980099   | 6982521   | SPSB2        | - | 2422  | 1.495  | 110  | 195  | 82   | 2.372 | 1.246 | 0.178 | 0 |
| chr1  | 146649429 | 146651528 | PDI3P        | + | 2099  | 4.523  | 293  | 518  | 218  | 2.372 | 1.246 | 0.116 | 0 |
| chr13 | 92000073  | 92006829  | MIR17HG      | + | 6756  | 1.825  | 380  | 672  | 283  | 2.37  | 1.245 | 0.102 | 0 |
| chr7  | 42956461  | 42971805  | PSMA2        | - | 15344 | 2.781  | 1330 | 2347 | 991  | 2.369 | 1.244 | 0.061 | 1 |
| chr1  | 45241245  | 45244412  | RP58         | + | 3167  | 9.046  | 875  | 1544 | 652  | 2.368 | 1.243 | 0.083 | 1 |
| chr7  | 45022626  | 45026259  | SNHG15       | - | 3633  | 3.831  | 426  | 752  | 318  | 2.364 | 1.241 | 0.106 | 0 |
| chr17 | 49242795  | 49249105  | NME2         | + | 6310  | 3.795  | 732  | 1289 | 546  | 2.362 | 1.24  | 0.088 | 1 |
| chr2  | 68385004  | 68403094  | PNO1         | + | 18090 | 1.536  | 856  | 1509 | 639  | 2.361 | 1.239 | 0.076 | 1 |
| chr1  | 153631144 | 153634326 | SNAPIN       | + | 3182  | 1.543  | 151  | 266  | 112  | 2.361 | 1.239 | 0.154 | 0 |
| chr1  | 45266035  | 45271667  | PLK3         | + | 5632  | 7.104  | 1211 | 2133 | 904  | 2.36  | 1.239 | 0.086 | 1 |
| chr5  | 75911306  | 75919240  | F2RL2        | - | 7934  | 3.309  | 802  | 1412 | 598  | 2.359 | 1.238 | 0.086 | 1 |
| chr19 | 50354415  | 50363999  | PTOV1        | + | 9584  | 1.217  | 356  | 627  | 266  | 2.358 | 1.237 | 0.12  | 0 |
| chr15 | 69745158  | 69747884  | RPLP1        | + | 2726  | 20.042 | 1669 | 2938 | 1246 | 2.358 | 1.237 | 0.077 | 1 |
| chr11 | 94695786  | 94706776  | CWC15        | - | 10990 | 3.328  | 1135 | 1998 | 847  | 2.357 | 1.237 | 0.066 | 1 |
| chr17 | 72766685  | 72772470  | NAT9         | - | 5785  | 3.475  | 612  | 1077 | 457  | 2.357 | 1.237 | 0.097 | 1 |
| chr11 | 68658745  | 68671303  | MRPL21       | - | 12558 | 1.658  | 638  | 1122 | 476  | 2.356 | 1.236 | 0.092 | 1 |
| chr17 | 49231023  | 49239450  | NME1         | + | 8531  | 2.088  | 542  | 954  | 405  | 2.353 | 1.234 | 0.092 | 1 |
| chr12 | 32899477  | 32908887  | YARS2        | - | 9410  | 1.983  | 574  | 1010 | 429  | 2.351 | 1.234 | 0.092 | 1 |
| chr3  | 132373289 | 132396944 | UBA5         | + | 23655 | 2.121  | 1548 | 2718 | 1157 | 2.348 | 1.231 | 0.072 | 1 |
| chr10 | 75002581  | 75007025  | DNAJC9       | - | 4444  | 2.771  | 378  | 664  | 283  | 2.348 | 1.231 | 0.113 | 0 |
| chr7  | 99070514  | 99085217  | ZNF789       | + | 14703 | 1.189  | 535  | 940  | 400  | 2.345 | 1.229 | 0.099 | 1 |
| chr12 | 8071823   | 8088892   | SLC2A3       | + | 17069 | 2.426  | 1252 | 2196 | 937  | 2.344 | 1.229 | 0.091 | 1 |
| chr1  | 54497348  | 54519111  | TMEM59       | - | 21763 | 2.14   | 1450 | 2543 | 1085 | 2.343 | 1.228 | 0.065 | 1 |
| chrX  | 70280787  | 70288231  | SNX12        | - | 7444  | 1.268  | 290  | 508  | 217  | 2.342 | 1.227 | 0.13  | 0 |
| chr16 | 58147496  | 58163296  | C16orf80     | - | 15800 | 1.756  | 848  | 1487 | 635  | 2.341 | 1.227 | 0.088 | 1 |
| chr19 | 13049413  | 13055304  | CALR         | + | 5891  | 23.458 | 4248 | 7448 | 3181 | 2.341 | 1.227 | 0.091 | 1 |
| chr4  | 90033967  | 90036052  | TIGD2        | + | 2085  | 1.866  | 120  | 210  | 90   | 2.341 | 1.227 | 0.172 | 0 |
| chrX  | 51486480  | 51489326  | GSP2         | + | 2846  | 1.497  | 130  | 228  | 97   | 2.339 | 1.226 | 0.182 | 0 |
| chr12 | 46119502  | 46121704  | LOC400027    | - | 2202  | 2.887  | 193  | 339  | 145  | 2.338 | 1.225 | 0.159 | 0 |
| chr6  | 52842745  | 52860178  | GSTA4        | - | 17433 | 1.294  | 696  | 1220 | 522  | 2.337 | 1.225 | 0.084 | 1 |
| chr1  | 7831328   | 7841492   | VAMP3        | + | 10164 | 4.801  | 1499 | 2626 | 1123 | 2.337 | 1.225 | 0.077 | 1 |
| chr3  | 51422691  | 51426828  | MANF         | + | 4137  | 2.412  | 308  | 539  | 230  | 2.337 | 1.225 | 0.122 | 0 |
| chr6  | 44214848  | 44221614  | HSP90AB1     | + | 6766  | 14.218 | 2951 | 5169 | 2212 | 2.336 | 1.224 | 0.084 | 1 |
| chr11 | 4406126   | 4414926   | TRPM21       | - | 8800  | 1.612  | 432  | 757  | 324  | 2.335 | 1.223 | 0.118 | 0 |
| chr6  | 160199529 | 160210735 | TCIP1        | - | 11206 | 4.166  | 1434 | 2509 | 1076 | 2.332 | 1.221 | 0.077 | 1 |
| chr19 | 50162825  | 50169132  | IRF3         | - | 6307  | 1.102  | 209  | 367  | 157  | 2.332 | 1.222 | 0.169 | 0 |
| chr3  | 149456256 | 149470286 | COMMD2       | - | 14030 | 3.346  | 1457 | 2549 | 1094 | 2.33  | 1.22  | 0.07  | 1 |
| chr7  | 19735084  | 19748660  | TWISTNB      | - | 13576 | 1.897  | 800  | 1399 | 600  | 2.33  | 1.22  | 0.077 | 1 |
| chrX  | 77385244  | 77395179  | TAF9B        | - | 9935  | 1.006  | 312  | 546  | 234  | 2.33  | 1.22  | 0.109 | 0 |
| chr8  | 17913924  | 17942507  | ASAH1        | - | 28583 | 1.11   | 963  | 1683 | 723  | 2.326 | 1.218 | 0.094 | 1 |
| chr5  | 52393894  | 52405598  | MOCS2        | - | 11704 | 1.288  | 464  | 812  | 349  | 2.326 | 1.218 | 0.105 | 0 |
| chr15 | 43809805  | 43823818  | MAP1A        | + | 14013 | 3.592  | 1554 | 2715 | 1167 | 2.325 | 1.217 | 0.074 | 1 |
| chr16 | 66965957  | 66968320  | FAM96B       | - | 2363  | 2.713  | 195  | 341  | 147  | 2.322 | 1.215 | 0.163 | 0 |
| chr9  | 130922538 | 130926207 | C9orf16      | + | 3669  | 1.038  | 114  | 198  | 85   | 2.321 | 1.214 | 0.22  | 0 |
| chr7  | 117824085 | 117844093 | NAA38        | - | 20008 | 2.24   | 1388 | 2422 | 1044 | 2.319 | 1.214 | 0.073 | 1 |
| chr1  | 20808883  | 20812728  | CAMK2N1      | + | 3845  | 6.373  | 748  | 1304 | 563  | 2.316 | 1.211 | 0.097 | 1 |
| chr12 | 120875903 | 120878529 | COX6A1       | + | 2626  | 2.262  | 180  | 314  | 136  | 2.311 | 1.208 | 0.174 | 0 |
| chr20 | 4666796   | 4682234   | PRNP         | + | 15438 | 6.244  | 2958 | 5148 | 2228 | 2.31  | 1.208 | 0.09  | 1 |
| chr1  | 211748380 | 211752099 | SLC30A1      | - | 3719  | 6.949  | 781  | 1359 | 588  | 2.31  | 1.208 | 0.108 | 0 |
| chr12 | 121124948 | 121139667 | MEC          | + | 14719 | 3.546  | 1602 | 2787 | 1207 | 2.308 | 1.207 | 0.083 | 1 |
| chr1  | 112298189 | 112310199 | DDX20        | + | 12010 | 1.666  | 618  | 1075 | 466  | 2.306 | 1.206 | 0.094 | 1 |
| chr17 | 6546632   | 6554954   | MED31        | - | 8322  | 3.587  | 912  | 1586 | 688  | 2.306 | 1.206 | 0.093 | 1 |
| chr12 | 56735381  | 56754037  | STAT2        | - | 18656 | 3.8    | 2160 | 3754 | 1629 | 2.305 | 1.205 | 0.093 | 1 |
| chr17 | 74553845  | 74561430  | LOC100507246 | + | 7585  | 5.226  | 1217 | 2115 | 917  | 2.305 | 1.205 | 0.084 | 1 |
| chr21 | 27096790  | 27107965  | ATP5J        | - | 11175 | 2.076  | 716  | 1244 | 540  | 2.304 | 1.204 | 0.092 | 1 |
| chr3  | 14220227  | 14239869  | LSM3         | + | 19642 | 1.141  | 690  | 1199 | 520  | 2.302 | 1.203 | 0.094 | 1 |
| chr11 | 66610987  | 66614003  | RCE1         | + | 3121  | 2.274  | 208  | 362  | 157  | 2.302 | 1.203 | 0.166 | 0 |
| chr1  | 46016454  | 46035723  | AKR1A1       | + | 19269 | 1.079  | 630  | 1095 | 475  | 2.301 | 1.203 | 0.114 | 0 |

|       |           |           |                       |   |       |        |      |      |      |       |       |       |   |
|-------|-----------|-----------|-----------------------|---|-------|--------|------|------|------|-------|-------|-------|---|
| chr22 | 39925097  | 39928860  | <b>RPS19BP1</b>       | - | 3763  | 3.029  | 346  | 601  | 262  | 2.293 | 1.197 | 0.141 | 0 |
| chr12 | 50505899  | 50514234  | <b>C12orf62</b>       | + | 8335  | 2.284  | 577  | 1000 | 436  | 2.291 | 1.196 | 0.121 | 0 |
| chr21 | 30428647  | 30446010  | <b>CCT8</b>           | - | 17363 | 2.976  | 1607 | 2783 | 1215 | 2.29  | 1.195 | 0.075 | 1 |
| chr10 | 64893006  | 64914786  | <b>NRBF2</b>          | + | 21780 | 1.791  | 1212 | 2096 | 917  | 2.285 | 1.192 | 0.078 | 1 |
| chr19 | 10196805  | 10203928  | <b>C19orf66</b>       | + | 7123  | 1.463  | 315  | 546  | 239  | 2.285 | 1.192 | 0.153 | 0 |
| chr22 | 29190547  | 29196560  | <b>XBP1</b>           | - | 6013  | 8.33   | 1546 | 2674 | 1170 | 2.285 | 1.192 | 0.083 | 1 |
| chr9  | 88879462  | 88897490  | <b>ISCA1</b>          | - | 18028 | 2.208  | 1224 | 2116 | 927  | 2.283 | 1.191 | 0.088 | 1 |
| chr12 | 120634502 | 120639014 | <b>RPLP0</b>          | - | 4512  | 19.379 | 2684 | 4640 | 2032 | 2.283 | 1.191 | 0.093 | 1 |
| chr17 | 6917852   | 6918055   | <b>RNASEK-C17ORI+</b> | + | 734   | 1.822  | 10   | 18   | 8    | 2.283 | 1.191 | 0.435 | 0 |
| chr4  | 79839093  | 79860582  | <b>PAQR3</b>          | - | 21489 | 1.509  | 996  | 1721 | 754  | 2.282 | 1.19  | 0.092 | 1 |
| chr15 | 34376223  | 34394053  | <b>C15orf24</b>       | - | 17830 | 1.743  | 971  | 1679 | 735  | 2.282 | 1.19  | 0.076 | 1 |
| chr19 | 37001588  | 37019248  | <b>ZNF260</b>         | - | 17660 | 1.231  | 672  | 1161 | 508  | 2.282 | 1.19  | 0.097 | 1 |
| chr4  | 57829515  | 57843826  | <b>NOA1</b>           | - | 14311 | 1.355  | 595  | 1028 | 450  | 2.28  | 1.189 | 0.109 | 0 |
| chr5  | 140027383 | 140042065 | <b>IK</b>             | + | 14682 | 1.693  | 765  | 1322 | 580  | 2.279 | 1.188 | 0.096 | 1 |
| chr4  | 2743386   | 2758103   | <b>TNIP2</b>          | - | 14717 | 1.445  | 647  | 1117 | 491  | 2.276 | 1.187 | 0.115 | 0 |
| chr2  | 232319458 | 232329205 | <b>NCL</b>            | - | 9747  | 16.165 | 4861 | 8388 | 3685 | 2.276 | 1.186 | 0.106 | 0 |
| chr1  | 161009040 | 161015757 | <b>USF1</b>           | - | 6717  | 1.896  | 388  | 669  | 294  | 2.276 | 1.187 | 0.138 | 0 |
| chrX  | 68380580  | 68385365  | <b>PJA1</b>           | - | 4785  | 1.216  | 177  | 307  | 134  | 2.276 | 1.187 | 0.179 | 0 |
| chr2  | 190634992 | 190649097 | <b>ORMDL1</b>         | - | 14105 | 3.017  | 1321 | 2280 | 1002 | 2.275 | 1.186 | 0.079 | 1 |
| chr19 | 44598481  | 44612479  | <b>ZNF224</b>         | + | 13998 | 1.654  | 711  | 1226 | 539  | 2.275 | 1.186 | 0.102 | 0 |
| chr1  | 174968570 | 174981163 | <b>CACYBP</b>         | + | 12593 | 1.898  | 742  | 1278 | 563  | 2.269 | 1.182 | 0.092 | 1 |
| chr17 | 8280833   | 8286565   | <b>RPL26</b>          | - | 5732  | 8.118  | 1439 | 2479 | 1092 | 2.269 | 1.182 | 0.084 | 1 |
| chr3  | 180319917 | 180328918 | <b>TTC14</b>          | + | 9001  | 4.804  | 1338 | 2304 | 1016 | 2.267 | 1.181 | 0.084 | 1 |
| chr18 | 3247527   | 3256234   | <b>MYL12A</b>         | + | 8707  | 13.751 | 3723 | 6409 | 2828 | 2.266 | 1.18  | 0.092 | 1 |
| chr6  | 33168602  | 33172214  | <b>SLC39A7</b>        | + | 3612  | 7.313  | 810  | 1394 | 615  | 2.265 | 1.179 | 0.101 | 0 |
| chr11 | 120195837 | 120204388 | <b>TMEM136</b>        | + | 8551  | 1.777  | 464  | 799  | 353  | 2.263 | 1.178 | 0.13  | 0 |
| chr7  | 42971938  | 42977453  | <b>MRPL32</b>         | + | 5515  | 2.227  | 379  | 652  | 288  | 2.263 | 1.178 | 0.13  | 0 |
| chr11 | 11373320  | 11374904  | <b>CSNK2A1P</b>       | - | 1584  | 1.114  | 54   | 93   | 41   | 2.263 | 1.178 | 0.248 | 0 |
| chr5  | 177576464 | 177580961 | <b>NHP2</b>           | - | 4497  | 1.455  | 200  | 343  | 152  | 2.262 | 1.178 | 0.177 | 0 |
| chr2  | 201676268 | 201688569 | <b>BZW1</b>           | + | 12301 | 5.737  | 2201 | 3781 | 1674 | 2.259 | 1.175 | 0.082 | 1 |
| chr4  | 148538538 | 148556672 | <b>TMEM184C</b>       | + | 18134 | 1.586  | 894  | 1536 | 680  | 2.258 | 1.175 | 0.088 | 1 |
| chr1  | 155978838 | 155990758 | <b>SSR2</b>           | - | 11920 | 3.012  | 1105 | 1898 | 841  | 2.256 | 1.174 | 0.094 | 1 |
| chr2  | 71357443  | 71377232  | <b>MPHOSPH10</b>      | + | 19789 | 2.136  | 1311 | 2251 | 998  | 2.255 | 1.173 | 0.084 | 1 |
| chr11 | 5710816   | 5732093   | <b>TRIM22</b>         | + | 21277 | 3.334  | 2210 | 3793 | 1682 | 2.254 | 1.173 | 0.083 | 1 |
| chr7  | 75931874  | 75933614  | <b>HSPB1</b>          | + | 1740  | 6.86   | 358  | 614  | 273  | 2.25  | 1.17  | 0.168 | 0 |
| chr2  | 200820039 | 200828847 | <b>C2orf47</b>        | + | 8808  | 2.843  | 775  | 1328 | 590  | 2.249 | 1.169 | 0.097 | 1 |
| chr14 | 23938897  | 23947402  | <b>NGDN</b>           | + | 8505  | 2.926  | 769  | 1319 | 586  | 2.249 | 1.17  | 0.098 | 1 |
| chr2  | 217363519 | 217366188 | <b>RPL37A</b>         | - | 2669  | 17.507 | 1446 | 2477 | 1102 | 2.247 | 1.168 | 0.088 | 1 |
| chr1  | 43629844  | 43638241  | <b>EBNA1BP2</b>       | + | 8397  | 3.531  | 913  | 1563 | 697  | 2.242 | 1.165 | 0.098 | 1 |
| chrX  | 100663120 | 100669128 | <b>HNRNPH2</b>        | + | 6008  | 3.49   | 644  | 1102 | 491  | 2.242 | 1.165 | 0.113 | 0 |
| chr13 | 52586522  | 52598826  | <b>ALG11</b>          | + | 17258 | 2.821  | 1072 | 1833 | 818  | 2.241 | 1.164 | 0.094 | 1 |
| chr1  | 24018268  | 24022915  | <b>RPL11</b>          | - | 4647  | 13.589 | 1951 | 3338 | 1489 | 2.241 | 1.164 | 0.092 | 1 |
| chr6  | 34385230  | 34393902  | <b>RPS10</b>          | + | 8672  | 4.53   | 1216 | 2079 | 928  | 2.239 | 1.163 | 0.091 | 1 |
| chr19 | 50058967  | 50083803  | <b>NOSIP</b>          | - | 24836 | 1.092  | 834  | 1426 | 637  | 2.237 | 1.161 | 0.104 | 0 |
| chrX  | 54834170  | 54842445  | <b>MAGED2</b>         | + | 8275  | 2.727  | 690  | 1180 | 527  | 2.236 | 1.161 | 0.117 | 0 |
| chr8  | 42691816  | 42698474  | <b>THAP1</b>          | - | 6658  | 1.09   | 225  | 384  | 172  | 2.233 | 1.159 | 0.159 | 0 |
| chr17 | 7788122   | 7786075   | <b>CHD3</b>           | + | 27953 | 1.712  | 1478 | 2522 | 1130 | 2.232 | 1.158 | 0.094 | 1 |
| chr3  | 88198892  | 88207115  | <b>C3orf38</b>        | + | 8223  | 2.704  | 692  | 1181 | 530  | 2.23  | 1.157 | 0.099 | 1 |
| chr2  | 38970740  | 38978636  | <b>SRSF7</b>          | - | 7896  | 15.205 | 3713 | 6334 | 2840 | 2.23  | 1.157 | 0.105 | 0 |
| chr12 | 100594573 | 100618201 | <b>ACTR6</b>          | + | 23628 | 1.212  | 889  | 1516 | 680  | 2.229 | 1.156 | 0.095 | 1 |
| chr10 | 23728197  | 23731310  | <b>OTUD1</b>          | + | 3113  | 1.688  | 160  | 272  | 122  | 2.228 | 1.156 | 0.204 | 0 |
| chr14 | 74960449  | 74962271  | <b>ISCA2</b>          | + | 1822  | 3.117  | 172  | 294  | 132  | 2.228 | 1.156 | 0.205 | 0 |
| chr19 | 8386383   | 8387280   | <b>RPS28</b>          | + | 897   | 4.012  | 109  | 186  | 83   | 2.228 | 1.156 | 0.238 | 0 |
| chr15 | 40845297  | 40857252  | <b>C15orf57</b>       | - | 11955 | 1.212  | 448  | 764  | 343  | 2.227 | 1.155 | 0.129 | 0 |
| chr6  | 19837616  | 19840915  | <b>ID4</b>            | + | 3299  | 3.896  | 393  | 670  | 301  | 2.227 | 1.155 | 0.145 | 0 |
| chr19 | 55964345  | 55973049  | <b>ISOC2</b>          | - | 8704  | 1.561  | 413  | 704  | 316  | 2.226 | 1.155 | 0.15  | 0 |
| chr15 | 78832746  | 78841563  | <b>PSMA4</b>          | + | 8817  | 3.31   | 904  | 1541 | 692  | 2.225 | 1.154 | 0.097 | 1 |
| chr6  | 33540322  | 33548070  | <b>BAK1</b>           | - | 7748  | 1.823  | 428  | 729  | 328  | 2.223 | 1.153 | 0.152 | 0 |
| chr22 | 35777059  | 35790207  | <b>HMOX1</b>          | + | 13148 | 2.314  | 916  | 1560 | 702  | 2.221 | 1.151 | 0.131 | 0 |
| chr1  | 151138497 | 151142773 | <b>SCNM1</b>          | + | 4276  | 2.391  | 315  | 536  | 241  | 2.22  | 1.15  | 0.151 | 0 |
| chr7  | 66452689  | 66460588  | <b>SBDS</b>           | - | 7899  | 2.267  | 555  | 944  | 425  | 2.219 | 1.15  | 0.117 | 0 |
| chr8  | 125487007 | 125500859 | <b>RNF139</b>         | + | 13852 | 2.893  | 1242 | 2112 | 952  | 2.218 | 1.149 | 0.094 | 1 |
| chr12 | 112451151 | 112461024 | <b>ERP29</b>          | + | 9873  | 2.181  | 660  | 1121 | 506  | 2.214 | 1.147 | 0.123 | 0 |
| chr7  | 77423044  | 77427747  | <b>TMEM60</b>         | - | 4703  | 2.803  | 404  | 687  | 310  | 2.214 | 1.146 | 0.145 | 0 |
| chr19 | 39390339  | 39399534  | <b>NFKBIB</b>         | + | 9195  | 1.115  | 311  | 529  | 239  | 2.211 | 1.145 | 0.172 | 0 |
| chrX  | 107327434 | 107334874 | <b>PSMD10</b>         | - | 7440  | 1.615  | 373  | 634  | 287  | 2.211 | 1.145 | 0.135 | 0 |
| chr3  | 48481685  | 48485537  | <b>CCDF72</b>         | + | 3852  | 3.693  | 436  | 740  | 334  | 2.21  | 1.144 | 0.143 | 0 |
| chr19 | 58082933  | 58090243  | <b>ZNF416</b>         | - | 7310  | 2.054  | 460  | 780  | 353  | 2.209 | 1.144 | 0.141 | 0 |
| chr3  | 44690232  | 44702283  | <b>ZNF35</b>          | + | 12051 | 2.189  | 814  | 1380 | 625  | 2.207 | 1.142 | 0.109 | 0 |
| chr7  | 91502020  | 91510016  | <b>MTERF</b>          | - | 7996  | 3.404  | 845  | 1433 | 649  | 2.206 | 1.141 | 0.101 | 0 |
| chr8  | 141521396 | 141527252 | <b>CHRAC1</b>         | + | 5856  | 2.121  | 379  | 643  | 291  | 2.205 | 1.141 | 0.156 | 0 |

|       |           |           |                  |   |       |         |       |       |       |       |       |       |   |
|-------|-----------|-----------|------------------|---|-------|---------|-------|-------|-------|-------|-------|-------|---|
| chr11 | 126071988 | 126081587 | <b>RPUSD4</b>    | - | 9599  | 1.734   | 514   | 871   | 395   | 2.204 | 1.14  | 0.129 | 0 |
| chr22 | 42481529  | 42486888  | <b>NDUFA6</b>    | - | 5359  | 2.801   | 464   | 786   | 356   | 2.204 | 1.14  | 0.134 | 0 |
| chr9  | 34646634  | 34650573  | <b>GALT</b>      | + | 3939  | 2.156   | 259   | 439   | 199   | 2.204 | 1.14  | 0.181 | 0 |
| chr17 | 79213110  | 79215098  | <b>C17orf89</b>  | + | 1988  | 3.457   | 208   | 353   | 160   | 2.2   | 1.138 | 0.203 | 0 |
| chrX  | 47001614  | 47004609  | <b>NDUFB11</b>   | - | 2995  | 1.567   | 144   | 244   | 111   | 2.199 | 1.137 | 0.206 | 0 |
| chr11 | 62360674  | 62369312  | <b>MTA2</b>      | - | 8638  | 3.55    | 942   | 1593  | 725   | 2.198 | 1.136 | 0.113 | 0 |
| chr16 | 2012061   | 2014827   | <b>RPS2</b>      | - | 2766  | 8.143   | 688   | 1164  | 530   | 2.198 | 1.136 | 0.131 | 0 |
| chr8  | 144915754 | 144923146 | <b>NRBP2</b>     | - | 7392  | 1.183   | 267   | 452   | 205   | 2.196 | 1.135 | 0.18  | 0 |
| chr2  | 220036618 | 220041702 | <b>CNPPD1</b>    | - | 5084  | 1.958   | 302   | 512   | 233   | 2.195 | 1.134 | 0.18  | 0 |
| chr6  | 31926580  | 31937532  | <b>SKIV2L</b>    | + | 10952 | 1.43    | 477   | 806   | 367   | 2.193 | 1.133 | 0.15  | 0 |
| chr11 | 6632047   | 6633475   | <b>TAF10</b>     | - | 1428  | 3.621   | 156   | 264   | 120   | 2.192 | 1.132 | 0.229 | 0 |
| chr13 | 48807273  | 48836232  | <b>ITM2B</b>     | + | 28959 | 3.124   | 2818  | 4755  | 2172  | 2.189 | 1.131 | 0.1   | 1 |
| chr3  | 185207388 | 185216845 | <b>TMEM41A</b>   | - | 9457  | 1.723   | 500   | 843   | 385   | 2.189 | 1.13  | 0.141 | 0 |
| chr2  | 10580507  | 10588453  | <b>ODC1</b>      | - | 7946  | 5.14    | 1260  | 2127  | 971   | 2.189 | 1.13  | 0.105 | 0 |
| chr1  | 231154703 | 231175995 | <b>RPM89A</b>    | - | 21292 | 1.006   | 657   | 1108  | 507   | 2.185 | 1.127 | 0.131 | 0 |
| chrX  | 135579237 | 135594503 | <b>HTATSF1</b>   | + | 15266 | 1.413   | 671   | 1132  | 518   | 2.185 | 1.128 | 0.113 | 0 |
| chrX  | 118602362 | 118605359 | <b>SLC25A5</b>   | + | 2997  | 2.677   | 245   | 413   | 189   | 2.184 | 1.127 | 0.188 | 0 |
| chr11 | 47600561  | 47606115  | <b>NDUFS3</b>    | + | 5554  | 2.657   | 454   | 765   | 350   | 2.183 | 1.127 | 0.143 | 0 |
| chr9  | 139756570 | 139760738 | <b>EDF1</b>      | - | 4168  | 2.757   | 351   | 591   | 271   | 2.183 | 1.126 | 0.168 | 0 |
| chr2  | 220071537 | 220074370 | <b>ZFAND2B</b>   | + | 2833  | 1.246   | 107   | 180   | 82    | 2.181 | 1.125 | 0.248 | 0 |
| chr2  | 63815742  | 63834330  | <b>MDH1</b>      | + | 18588 | 2.308   | 1323  | 2227  | 1021  | 2.18  | 1.125 | 0.107 | 0 |
| chr11 | 65190268  | 65194003  | <b>NEAT1</b>     | + | 3735  | 135.366 | 15732 | 26484 | 12148 | 2.18  | 1.124 | 0.199 | 0 |
| chr3  | 101399933 | 101405563 | <b>RPL24</b>     | - | 5630  | 6.336   | 1111  | 1869  | 858   | 2.178 | 1.123 | 0.099 | 1 |
| chr20 | 23331372  | 23335408  | <b>NXT1</b>      | + | 4036  | 1.6     | 197   | 331   | 152   | 2.178 | 1.123 | 0.206 | 0 |
| chr5  | 96496570  | 96519005  | <b>RIOK2</b>     | - | 22435 | 1.933   | 1356  | 2282  | 1048  | 2.177 | 1.123 | 0.094 | 1 |
| chr22 | 30163357  | 30166402  | <b>UQCR10</b>    | + | 3045  | 2.979   | 278   | 468   | 215   | 2.177 | 1.123 | 0.178 | 0 |
| chr6  | 31654725  | 31671137  | <b>ABHD16A</b>   | - | 16412 | 1.373   | 688   | 1157  | 531   | 2.176 | 1.122 | 0.137 | 0 |
| chr5  | 34905365  | 34915780  | <b>RAD1</b>      | - | 10415 | 3.609   | 1162  | 1954  | 898   | 2.176 | 1.122 | 0.107 | 0 |
| chr17 | 79648223  | 79650954  | <b>ARL16</b>     | - | 2731  | 2.223   | 185   | 311   | 143   | 2.175 | 1.121 | 0.214 | 0 |
| chr2  | 27587218  | 27593324  | <b>EIF2B4</b>    | - | 6106  | 1.945   | 364   | 613   | 282   | 2.174 | 1.12  | 0.161 | 0 |
| chr1  | 145575987 | 145586546 | <b>PIAS3</b>     | + | 10559 | 4.035   | 1306  | 2194  | 1009  | 2.173 | 1.12  | 0.116 | 0 |
| chr2  | 232573234 | 232578250 | <b>PTMA</b>      | + | 5016  | 6.401   | 974   | 1637  | 753   | 2.173 | 1.12  | 0.135 | 0 |
| chr5  | 177019212 | 177023099 | <b>TMED9</b>     | + | 3887  | 5.216   | 622   | 1046  | 481   | 2.173 | 1.119 | 0.135 | 0 |
| chr4  | 174252526 | 174255595 | <b>HMGB2</b>     | - | 3069  | 15.467  | 1474  | 2477  | 1140  | 2.172 | 1.119 | 0.1   | 0 |
| chr6  | 33257377  | 33258711  | <b>PDN6</b>      | + | 1334  | 2.183   | 88    | 149   | 68    | 2.172 | 1.119 | 0.262 | 0 |
| chr7  | 141438175 | 141450257 | <b>SSBP1</b>     | + | 12082 | 3.44    | 1287  | 2161  | 995   | 2.17  | 1.118 | 0.106 | 0 |
| chr5  | 133291197 | 133304406 | <b>C5orf15</b>   | - | 13209 | 2.762   | 1136  | 1906  | 879   | 2.169 | 1.117 | 0.101 | 0 |
| chr19 | 36605887  | 36616849  | <b>TBCB</b>      | + | 10962 | 1.958   | 657   | 1103  | 508   | 2.169 | 1.117 | 0.137 | 0 |
| chr11 | 9002122   | 9025596   | <b>NRIP3</b>     | - | 23474 | 1.2     | 875   | 1469  | 677   | 2.168 | 1.117 | 0.109 | 0 |
| chr19 | 33864574  | 33873592  | <b>CEBPG</b>     | + | 9018  | 2.975   | 828   | 1390  | 641   | 2.167 | 1.116 | 0.12  | 0 |
| chr1  | 94352589  | 94375012  | <b>GCLM</b>      | - | 22423 | 2.107   | 1477  | 2476  | 1144  | 2.164 | 1.114 | 0.097 | 1 |
| chr17 | 38077295  | 38083884  | <b>ORMDL3</b>    | - | 6589  | 1.118   | 224   | 376   | 174   | 2.164 | 1.114 | 0.205 | 0 |
| chr5  | 112196884 | 112228776 | <b>PDN9</b>      | + | 31892 | 1.78    | 1752  | 2935  | 1358  | 2.162 | 1.112 | 0.112 | 0 |
| chr5  | 158690088 | 158713048 | <b>UBLCP1</b>    | + | 22960 | 1.821   | 1304  | 2186  | 1011  | 2.162 | 1.113 | 0.099 | 1 |
| chr3  | 39448203  | 39454032  | <b>RPSA</b>      | + | 5829  | 12.281  | 2212  | 3706  | 1714  | 2.161 | 1.112 | 0.113 | 0 |
| chr11 | 77327195  | 77348851  | <b>CLNS1A</b>    | - | 21656 | 1.69    | 1138  | 1905  | 882   | 2.159 | 1.11  | 0.105 | 0 |
| chr4  | 52886860  | 52904485  | <b>SGCB</b>      | - | 17625 | 3.49    | 1918  | 3212  | 1487  | 2.159 | 1.111 | 0.101 | 0 |
| chr16 | 68334517  | 68344868  | <b>SLC7A6OS</b>  | - | 10351 | 2.162   | 690   | 1156  | 535   | 2.159 | 1.11  | 0.131 | 0 |
| chr6  | 83072922  | 83077133  | <b>TPBG</b>      | + | 4211  | 6.311   | 808   | 1353  | 626   | 2.159 | 1.111 | 0.139 | 0 |
| chr15 | 35270541  | 35280497  | <b>ZNF770</b>    | - | 9956  | 2.781   | 858   | 1437  | 666   | 2.158 | 1.11  | 0.115 | 0 |
| chr10 | 99437180  | 99447015  | <b>AVP11</b>     | - | 9835  | 2.54    | 759   | 1269  | 588   | 2.156 | 1.108 | 0.144 | 0 |
| chr12 | 110929329 | 110939916 | <b>VPS29</b>     | - | 10587 | 2.43    | 800   | 1338  | 621   | 2.155 | 1.108 | 0.115 | 0 |
| chr4  | 7061779   | 7069800   | <b>GRPEL1</b>    | - | 8021  | 2.428   | 598   | 1000  | 464   | 2.155 | 1.107 | 0.141 | 0 |
| chr12 | 4430358   | 4469190   | <b>C12orf5</b>   | + | 38832 | 2.024   | 2426  | 4053  | 1883  | 2.152 | 1.106 | 0.119 | 0 |
| chr6  | 26634610  | 26659980  | <b>ZNF322</b>    | - | 25370 | 1.621   | 1273  | 2127  | 988   | 2.152 | 1.105 | 0.111 | 0 |
| chr14 | 24630421  | 24635774  | <b>IRF9</b>      | + | 5353  | 4.349   | 708   | 1183  | 549   | 2.152 | 1.106 | 0.146 | 0 |
| chr14 | 20757300  | 20774153  | <b>TTC5</b>      | - | 16853 | 1.022   | 528   | 882   | 410   | 2.15  | 1.104 | 0.15  | 0 |
| chr11 | 61556601  | 61560085  | <b>C11orf10</b>  | - | 3484  | 1.559   | 167   | 278   | 129   | 2.147 | 1.102 | 0.218 | 0 |
| chr17 | 46125685  | 46138907  | <b>NFE2L1</b>    | + | 13222 | 3.743   | 1523  | 2541  | 1183  | 2.146 | 1.102 | 0.12  | 0 |
| chr12 | 54058943  | 54070512  | <b>ATP5G2</b>    | - | 11569 | 3.591   | 1285  | 2144  | 999   | 2.145 | 1.101 | 0.113 | 0 |
| chr15 | 85186011  | 85197521  | <b>WDR73</b>     | - | 11510 | 1.415   | 501   | 836   | 389   | 2.145 | 1.101 | 0.15  | 0 |
| chr1  | 33402049  | 33430286  | <b>RNF19B</b>    | - | 28237 | 1.26    | 1094  | 1825  | 851   | 2.144 | 1.101 | 0.124 | 0 |
| chr22 | 41829491  | 41843027  | <b>TOB2</b>      | - | 13536 | 5.078   | 2086  | 3477  | 1623  | 2.142 | 1.099 | 0.139 | 0 |
| chr22 | 51017386  | 51021428  | <b>CHKB</b>      | - | 4042  | 1.01    | 124   | 207   | 96    | 2.142 | 1.099 | 0.252 | 0 |
| chr11 | 17095938  | 17099220  | <b>RPS13</b>     | - | 3282  | 10.727  | 1085  | 1808  | 844   | 2.142 | 1.099 | 0.121 | 0 |
| chr15 | 78441718  | 78462884  | <b>IDH3A</b>     | + | 21166 | 1.243   | 805   | 1342  | 627   | 2.14  | 1.098 | 0.137 | 0 |
| chr2  | 122484520 | 122494503 | <b>MKI67IP</b>   | - | 9983  | 3.536   | 1090  | 1814  | 848   | 2.139 | 1.097 | 0.121 | 0 |
| chr4  | 184415889 | 184425668 | <b>LOC389247</b> | - | 9779  | 1.087   | 333   | 555   | 259   | 2.139 | 1.097 | 0.149 | 0 |
| chr11 | 818900    | 825571    | <b>PNPLA2</b>    | + | 6671  | 3.165   | 638   | 1062  | 496   | 2.139 | 1.097 | 0.164 | 0 |
| chr15 | 75212616  | 75230495  | <b>COX5A</b>     | - | 17879 | 1.185   | 652   | 1086  | 508   | 2.138 | 1.096 | 0.139 | 0 |
| chr15 | 90627211  | 90645708  | <b>IDH2</b>      | - | 18497 | 1.433   | 817   | 1360  | 636   | 2.137 | 1.096 | 0.131 | 0 |

|       |           |           |              |   |       |         |      |       |      |       |       |       |   |
|-------|-----------|-----------|--------------|---|-------|---------|------|-------|------|-------|-------|-------|---|
| chr10 | 85899184  | 85913311  | GHITM        | + | 14127 | 3.764   | 1649 | 2743  | 1284 | 2.136 | 1.095 | 0.113 | 0 |
| chr12 | 118573869 | 118583390 | PEBP1        | - | 9521  | 3.323   | 969  | 1611  | 754  | 2.135 | 1.094 | 0.135 | 0 |
| chr13 | 95226307  | 95248511  | TGDS         | + | 22204 | 1.769   | 1213 | 2016  | 945  | 2.132 | 1.093 | 0.121 | 0 |
| chr14 | 53241910  | 53258386  | GNPNAT1      | - | 16476 | 2.142   | 1098 | 1826  | 856  | 2.132 | 1.093 | 0.113 | 0 |
| chr1  | 35447126  | 35450948  | ZMYMGNB      | - | 3822  | 1.94    | 227  | 378   | 177  | 2.131 | 1.091 | 0.206 | 0 |
| chr1  | 24128366  | 24151949  | HMGCL        | - | 23583 | 1.001   | 723  | 1201  | 564  | 2.129 | 1.09  | 0.143 | 0 |
| chr11 | 114310107 | 114321000 | REXO2        | + | 10893 | 3.613   | 1228 | 2039  | 958  | 2.129 | 1.09  | 0.109 | 0 |
| chr4  | 109541721 | 109551639 | RPL34        | + | 9918  | 6.963   | 2135 | 3545  | 1665 | 2.129 | 1.09  | 0.121 | 0 |
| chr17 | 73937588  | 73975515  | ACOX1        | - | 37927 | 1.82    | 2144 | 3559  | 1672 | 2.128 | 1.09  | 0.116 | 0 |
| chr3  | 32522803  | 32544403  | CMTM6        | - | 21600 | 2.595   | 1738 | 2886  | 1356 | 2.128 | 1.089 | 0.116 | 0 |
| chr5  | 141000442 | 141016423 | HDAC3        | - | 15981 | 2.151   | 1062 | 1763  | 828  | 2.127 | 1.089 | 0.124 | 0 |
| chr10 | 75561668  | 75571589  | NDST2        | - | 9921  | 1.484   | 449  | 745   | 350  | 2.126 | 1.088 | 0.176 | 0 |
| chr14 | 39644386  | 39652422  | PNN          | + | 8036  | 8.835   | 2211 | 3668  | 1725 | 2.126 | 1.088 | 0.114 | 0 |
| chr19 | 58193356  | 58201169  | ZNF551       | + | 7813  | 2.556   | 613  | 1018  | 479  | 2.125 | 1.088 | 0.149 | 0 |
| chr3  | 170606203 | 170626426 | EIF5A2       | - | 20223 | 1.991   | 1250 | 2073  | 975  | 2.124 | 1.087 | 0.116 | 0 |
| chr1  | 115247084 | 115259515 | NRAS         | - | 12431 | 5.969   | 2309 | 3829  | 1803 | 2.124 | 1.087 | 0.116 | 0 |
| chr11 | 111944967 | 111955874 | C11orf57     | + | 10907 | 2.071   | 701  | 1162  | 547  | 2.123 | 1.086 | 0.134 | 0 |
| chr3  | 122130699 | 122134882 | WDR5B        | - | 4183  | 1.081   | 140  | 233   | 109  | 2.121 | 1.085 | 0.222 | 0 |
| chr14 | 20811229  | 20811570  | RPPH1        | - | 341   | 218.652 | 2327 | 3855  | 1817 | 2.121 | 1.085 | 0.114 | 0 |
| chr9  | 136215068 | 136218280 | RPL7A        | + | 3212  | 9.092   | 900  | 1490  | 703  | 2.118 | 1.083 | 0.134 | 0 |
| chr4  | 88812994  | 88815167  | HSP90AB3P    | + | 2173  | 2.518   | 170  | 282   | 133  | 2.118 | 1.083 | 0.209 | 0 |
| chr2  | 20232410  | 20251789  | LAPTM4A      | - | 19379 | 4.194   | 2522 | 4175  | 1972 | 2.117 | 1.082 | 0.123 | 0 |
| chr14 | 77564577  | 77583630  | KIAA1737     | + | 19053 | 1.145   | 669  | 1108  | 523  | 2.117 | 1.082 | 0.148 | 0 |
| chr6  | 28234787  | 28245980  | ZNF187       | + | 11193 | 2.302   | 801  | 1325  | 626  | 2.117 | 1.082 | 0.128 | 0 |
| chr20 | 20015011  | 20036690  | CRNKL1       | - | 21679 | 1.579   | 1065 | 1762  | 832  | 2.116 | 1.081 | 0.119 | 0 |
| chr20 | 33292147  | 33301237  | TP53INP2     | + | 9090  | 3.825   | 1057 | 1749  | 826  | 2.116 | 1.081 | 0.145 | 0 |
| chr11 | 64851693  | 64855674  | ZFPL1        | + | 4181  | 3.284   | 420  | 695   | 328  | 2.116 | 1.081 | 0.178 | 0 |
| chr19 | 13033283  | 13044558  | FARSA        | - | 11275 | 1.364   | 469  | 776   | 367  | 2.114 | 1.08  | 0.177 | 0 |
| chr17 | 27071022  | 27077976  | TRAF4        | + | 6954  | 5.49    | 1159 | 1916  | 906  | 2.114 | 1.08  | 0.146 | 0 |
| chrX  | 48755194  | 48760422  | PQBP1        | + | 5228  | 1.412   | 227  | 376   | 178  | 2.113 | 1.079 | 0.206 | 0 |
| chr7  | 72299951  | 72307978  | SBDSP1       | + | 8027  | 1.443   | 358  | 591   | 280  | 2.112 | 1.078 | 0.176 | 0 |
| chrX  | 101859085 | 101860581 | ARMCX5-GPRAS | + | 5948  | 1.597   | 73   | 121   | 57   | 2.112 | 1.078 | 0.281 | 0 |
| chr9  | 101978706 | 101984246 | ALG2         | - | 5540  | 4.917   | 836  | 1382  | 654  | 2.112 | 1.078 | 0.141 | 0 |
| chr21 | 37442284  | 37445462  | CBR1         | + | 3178  | 3.928   | 381  | 631   | 298  | 2.112 | 1.079 | 0.187 | 0 |
| chr1  | 153516094 | 153518282 | S100A4       | - | 2188  | 25.318  | 1713 | 2831  | 1340 | 2.112 | 1.079 | 0.124 | 0 |
| chr20 | 42086503  | 42092244  | SRSF6        | + | 5741  | 20.183  | 3578 | 5908  | 2801 | 2.109 | 1.076 | 0.139 | 0 |
| chr16 | 75480922  | 75498584  | TMEM170A     | - | 17662 | 1.523   | 828  | 1365  | 648  | 2.104 | 1.073 | 0.141 | 0 |
| chr17 | 7387697   | 7417935   | POLR2A       | + | 30238 | 7.034   | 6535 | 10775 | 5122 | 2.103 | 1.073 | 0.176 | 0 |
| chr19 | 40946747  | 40950282  | SEPTAD3      | - | 3535  | 7.621   | 826  | 1362  | 648  | 2.103 | 1.072 | 0.145 | 0 |
| chrX  | 100805513 | 100809675 | ARMCX1       | + | 4162  | 2.077   | 267  | 440   | 209  | 2.102 | 1.072 | 0.195 | 0 |
| chr11 | 62443971  | 62446527  | UBXN1        | - | 2556  | 4.073   | 317  | 524   | 249  | 2.102 | 1.072 | 0.204 | 0 |
| chr11 | 10533224  | 10562774  | RNF141       | - | 29550 | 1.666   | 1536 | 2531  | 1204 | 2.101 | 1.071 | 0.116 | 0 |
| chr13 | 50571142  | 50592603  | TRIM13       | + | 21461 | 2.445   | 1642 | 2706  | 1288 | 2.1   | 1.07  | 0.113 | 0 |
| chr9  | 101984569 | 101992901 | SEC61B       | + | 8332  | 4.606   | 1194 | 1966  | 937  | 2.097 | 1.069 | 0.121 | 0 |
| chrX  | 77154960  | 77160881  | COX7B        | + | 5921  | 2.356   | 433  | 712   | 339  | 2.097 | 1.068 | 0.163 | 0 |
| chr11 | 67374322  | 67380012  | NDUFV1       | + | 5690  | 2.226   | 387  | 638   | 304  | 2.097 | 1.068 | 0.19  | 0 |
| chr1  | 16340522  | 16345285  | HSPB7        | - | 4763  | 1.319   | 192  | 317   | 151  | 2.096 | 1.067 | 0.228 | 0 |
| chr19 | 39876269  | 39881679  | PAF1         | - | 5410  | 2.379   | 394  | 649   | 310  | 2.094 | 1.066 | 0.187 | 0 |
| chr17 | 7761063   | 7765600   | CY85D1       | + | 4537  | 1.114   | 154  | 253   | 121  | 2.094 | 1.067 | 0.249 | 0 |
| chr10 | 103911932 | 103923627 | NOLC1        | + | 11695 | 2.253   | 814  | 1337  | 639  | 2.093 | 1.065 | 0.141 | 0 |
| chr5  | 95149552  | 95158577  | GLRX         | - | 9025  | 4.834   | 1335 | 2194  | 1049 | 2.092 | 1.065 | 0.142 | 0 |
| chrX  | 119005733 | 119010629 | NDUFA1       | + | 4896  | 2.111   | 319  | 525   | 251  | 2.092 | 1.065 | 0.188 | 0 |
| chr2  | 54014067  | 54045956  | ERLEC1       | + | 31889 | 1.9     | 1884 | 3094  | 1480 | 2.09  | 1.063 | 0.125 | 0 |
| chr12 | 110872705 | 110888158 | ARPC3        | - | 15453 | 2.936   | 1423 | 2338  | 1118 | 2.09  | 1.064 | 0.113 | 0 |
| chr11 | 85358962  | 85367597  | TMEM126A     | + | 8635  | 1.934   | 520  | 855   | 409  | 2.09  | 1.064 | 0.149 | 0 |
| chr6  | 139349818 | 139364439 | C6orf115     | + | 14621 | 1.788   | 799  | 1313  | 628  | 2.089 | 1.063 | 0.155 | 0 |
| chr15 | 102182048 | 102192594 | TM2D3        | - | 10546 | 3.699   | 1202 | 1974  | 945  | 2.089 | 1.063 | 0.137 | 0 |
| chr10 | 53455245  | 53459355  | CSTF2T       | - | 4110  | 2.73    | 346  | 569   | 272  | 2.089 | 1.063 | 0.187 | 0 |
| chr11 | 74699949  | 74718743  | NEU3         | + | 18794 | 1.468   | 847  | 1392  | 666  | 2.088 | 1.062 | 0.147 | 0 |
| chr9  | 125670334 | 125675609 | ZBTB6        | - | 5275  | 3.291   | 541  | 888   | 425  | 2.088 | 1.062 | 0.148 | 0 |
| chr6  | 26597170  | 26600277  | ABT1         | + | 3107  | 3.547   | 338  | 555   | 266  | 2.086 | 1.061 | 0.196 | 0 |
| chr11 | 89933596  | 89956532  | CHORDC1      | - | 22936 | 3.161   | 2243 | 3679  | 1764 | 2.085 | 1.06  | 0.135 | 0 |
| chr15 | 79603490  | 79615189  | TMED3        | + | 11699 | 2.702   | 966  | 1585  | 760  | 2.085 | 1.06  | 0.15  | 0 |
| chr2  | 70121074  | 70132368  | SNRNP27      | + | 11294 | 2.755   | 963  | 1580  | 758  | 2.085 | 1.06  | 0.136 | 0 |
| chr10 | 112052797 | 112064707 | SMNDC1       | - | 11910 | 4.511   | 1681 | 2755  | 1323 | 2.082 | 1.058 | 0.119 | 0 |
| chr1  | 145438461 | 145442628 | TXNIP        | + | 4167  | 12.721  | 1633 | 2676  | 1285 | 2.082 | 1.058 | 0.137 | 0 |
| chr3  | 149682690 | 149688741 | PNF6         | - | 6051  | 8.862   | 1670 | 2736  | 1315 | 2.081 | 1.057 | 0.125 | 0 |
| chr12 | 112842993 | 112847443 | RPL6         | - | 4450  | 6.987   | 967  | 1585  | 761  | 2.081 | 1.057 | 0.133 | 0 |
| chr20 | 57603732  | 57607422  | ATP5E        | - | 3690  | 6.392   | 731  | 1198  | 575  | 2.081 | 1.057 | 0.144 | 0 |
| chr17 | 4699456   | 4701790   | PSMB6        | + | 2334  | 3.747   | 268  | 439   | 211  | 2.08  | 1.057 | 0.215 | 0 |
| chr19 | 5690271   | 5691678   | RPL36        | + | 1407  | 6.616   | 284  | 466   | 224  | 2.08  | 1.056 | 0.216 | 0 |

|       |           |           |                 |   |       |        |      |      |      |       |       |       |   |
|-------|-----------|-----------|-----------------|---|-------|--------|------|------|------|-------|-------|-------|---|
| chr22 | 25844053  | 25857645  | <b>CRYBB2P1</b> | + | 13592 | 1.851  | 769  | 1259 | 605  | 2.079 | 1.056 | 0.161 | 0 |
| chr6  | 64281919  | 64293489  | <b>PTP4A1</b>   | + | 11570 | 8.414  | 2993 | 4901 | 2357 | 2.079 | 1.056 | 0.148 | 0 |
| chr19 | 57980953  | 57988938  | <b>ZNF772</b>   | - | 7985  | 1.275  | 314  | 515  | 248  | 2.078 | 1.055 | 0.194 | 0 |
| chr12 | 8234806   | 8250373   | <b>NECAP1</b>   | + | 15567 | 2.27   | 1089 | 1783 | 858  | 2.077 | 1.055 | 0.14  | 0 |
| chr1  | 52870218  | 52883992  | <b>PRPF38A</b>  | + | 13774 | 2.262  | 968  | 1584 | 762  | 2.077 | 1.054 | 0.135 | 0 |
| chr2  | 3592690   | 3605940   | <b>RNA5EH1</b>  | - | 13250 | 2.627  | 1081 | 1770 | 852  | 2.077 | 1.055 | 0.133 | 0 |
| chr10 | 124753196 | 124768311 | <b>IKZF5</b>    | - | 15115 | 2.211  | 1042 | 1705 | 821  | 2.076 | 1.054 | 0.13  | 0 |
| chr13 | 45911303  | 45915297  | <b>TPT1</b>     | - | 3994  | 16.455 | 2032 | 3323 | 1602 | 2.075 | 1.053 | 0.137 | 0 |
| chr1  | 113454469 | 113498975 | <b>SLC16A1</b>  | - | 44506 | 1.365  | 1877 | 3066 | 1480 | 2.071 | 1.05  | 0.138 | 0 |
| chr12 | 51632507  | 51640501  | <b>DAZAP2</b>   | + | 7994  | 6.042  | 1481 | 2419 | 1168 | 2.07  | 1.05  | 0.146 | 0 |
| chr1  | 161195832 | 161200407 | <b>TOMM40L</b>  | + | 4575  | 1.383  | 192  | 314  | 152  | 2.069 | 1.049 | 0.252 | 0 |
| chr15 | 66161796  | 66184329  | <b>RAB11A</b>   | + | 22533 | 2.924  | 2046 | 3338 | 1615 | 2.067 | 1.048 | 0.135 | 0 |
| chr15 | 75192327  | 75199462  | <b>C15orf17</b> | - | 7135  | 2.403  | 523  | 854  | 413  | 2.067 | 1.047 | 0.188 | 0 |
| chr10 | 77157602  | 77161513  | <b>ZNF503</b>   | - | 3911  | 1.484  | 175  | 285  | 138  | 2.067 | 1.048 | 0.277 | 0 |
| chr7  | 99613218  | 99635403  | <b>ZKSCAN1</b>  | + | 22185 | 2.918  | 2013 | 3284 | 1589 | 2.066 | 1.047 | 0.134 | 0 |
| chr6  | 24650204  | 24667115  | <b>TDP2</b>     | - | 16911 | 2.495  | 1303 | 2126 | 1029 | 2.065 | 1.046 | 0.139 | 0 |
| chr1  | 153634513 | 153643479 | <b>ILF2</b>     | - | 8966  | 4.365  | 1215 | 1982 | 959  | 2.065 | 1.046 | 0.135 | 0 |
| chr19 | 50364459  | 50370822  | <b>PNKP</b>     | - | 6363  | 1.468  | 284  | 463  | 224  | 2.065 | 1.046 | 0.231 | 0 |
| chr17 | 56078279  | 56084707  | <b>SRSF1</b>    | - | 6428  | 12.749 | 2550 | 4158 | 2014 | 2.064 | 1.046 | 0.137 | 0 |
| chr19 | 39881962  | 39891203  | <b>MED29</b>    | + | 9241  | 1.656  | 468  | 764  | 370  | 2.063 | 1.045 | 0.19  | 0 |
| chr2  | 3501689   | 3523350   | <b>AD1</b>      | - | 21661 | 2.433  | 1632 | 2660 | 1290 | 2.062 | 1.044 | 0.137 | 0 |
| chr9  | 116029289 | 116037869 | <b>CDC26</b>    | - | 8580  | 1.193  | 314  | 512  | 248  | 2.062 | 1.044 | 0.209 | 0 |
| chr10 | 97803158  | 97820625  | <b>CCNJ</b>     | + | 17467 | 1.291  | 697  | 1135 | 551  | 2.058 | 1.041 | 0.156 | 0 |
| chrX  | 24001832  | 24045303  | <b>KLHL15</b>   | - | 43471 | 1.209  | 1630 | 2652 | 1289 | 2.057 | 1.04  | 0.137 | 0 |
| chr9  | 125680377 | 125693779 | <b>ZBTB26</b>   | - | 13402 | 1.524  | 635  | 1034 | 502  | 2.057 | 1.041 | 0.153 | 0 |
| chr4  | 47452810  | 47465676  | <b>COMMD8</b>   | - | 12866 | 1.808  | 723  | 1176 | 572  | 2.056 | 1.04  | 0.149 | 0 |
| chr19 | 36119979  | 36128587  | <b>RBM42</b>    | + | 8608  | 2.084  | 547  | 891  | 433  | 2.056 | 1.04  | 0.188 | 0 |
| chr17 | 61904769  | 61909387  | <b>SIMC5</b>    | + | 4618  | 6.326  | 903  | 1470 | 715  | 2.056 | 1.04  | 0.147 | 0 |
| chr17 | 5377612   | 5389494   | <b>DERL2</b>    | - | 11882 | 3.278  | 1209 | 1966 | 957  | 2.055 | 1.039 | 0.137 | 0 |
| chr8  | 37701397  | 37707431  | <b>BRF2</b>     | - | 6034  | 2.345  | 435  | 707  | 344  | 2.054 | 1.038 | 0.191 | 0 |
| chr7  | 140396480 | 140406446 | <b>NDUFB2</b>   | + | 9966  | 1.867  | 575  | 934  | 455  | 2.052 | 1.037 | 0.169 | 0 |
| chr5  | 89811444  | 89825401  | <b>LYSMD3</b>   | - | 13957 | 3.235  | 1406 | 2283 | 1113 | 2.05  | 1.036 | 0.135 | 0 |
| chr20 | 34287231  | 34288902  | <b>ROMO1</b>    | + | 1671  | 3.934  | 201  | 327  | 159  | 2.05  | 1.036 | 0.245 | 0 |
| chr1  | 202847409 | 202858385 | <b>RABIF</b>    | - | 10976 | 2.012  | 678  | 1101 | 537  | 2.049 | 1.035 | 0.172 | 0 |
| chr11 | 63527363  | 63536113  | <b>C11orf95</b> | - | 8750  | 1.171  | 311  | 506  | 247  | 2.049 | 1.035 | 0.231 | 0 |
| chr2  | 75873908  | 75889334  | <b>MRPL19</b>   | + | 15426 | 2.464  | 1173 | 1903 | 929  | 2.047 | 1.033 | 0.147 | 0 |
| chr7  | 100797685 | 100804557 | <b>AP1S1</b>    | + | 6872  | 2.154  | 451  | 733  | 358  | 2.047 | 1.034 | 0.204 | 0 |
| chr15 | 77223961  | 77242601  | <b>RCN2</b>     | + | 18640 | 1.7    | 985  | 1597 | 781  | 2.045 | 1.032 | 0.142 | 0 |
| chr9  | 33461350  | 33473941  | <b>NOL6</b>     | - | 12591 | 1.791  | 690  | 1120 | 547  | 2.045 | 1.032 | 0.177 | 0 |
| chr7  | 123181082 | 123197958 | <b>NDUFA5</b>   | - | 16876 | 1.716  | 892  | 1446 | 708  | 2.041 | 1.029 | 0.157 | 0 |
| chr2  | 8822112   | 8824583   | <b>ID2</b>      | + | 2471  | 18.661 | 1432 | 2320 | 1137 | 2.041 | 1.029 | 0.139 | 0 |
| chr17 | 16284366  | 16286054  | <b>UBB</b>      | + | 1688  | 4.944  | 257  | 416  | 204  | 2.041 | 1.03  | 0.227 | 0 |
| chr19 | 12907633  | 12912694  | <b>PRDX2</b>    | - | 5061  | 1.518  | 234  | 379  | 186  | 2.038 | 1.027 | 0.247 | 0 |
| chr2  | 128458596 | 128461407 | <b>SFT2D3</b>   | + | 2811  | 2.168  | 187  | 302  | 148  | 2.038 | 1.027 | 0.256 | 0 |
| chr5  | 140080031 | 140086239 | <b>ZMAT2</b>    | + | 6208  | 3.497  | 671  | 1085 | 533  | 2.037 | 1.027 | 0.168 | 0 |
| chr16 | 56965747  | 56977793  | <b>HERPUD1</b>  | + | 12046 | 7.685  | 2871 | 4642 | 2281 | 2.035 | 1.025 | 0.151 | 0 |
| chr8  | 124260689 | 124287781 | <b>ZHX1</b>     | - | 27092 | 1.275  | 1078 | 1743 | 857  | 2.034 | 1.024 | 0.139 | 0 |
| chr19 | 44416775  | 44439411  | <b>ZNF45</b>    | - | 22636 | 1.024  | 721  | 1165 | 572  | 2.034 | 1.025 | 0.156 | 0 |
| chr17 | 27046999  | 27051374  | <b>RPL23A</b>   | + | 4375  | 4.745  | 644  | 1041 | 511  | 2.034 | 1.024 | 0.165 | 0 |
| chr17 | 39981333  | 39992523  | <b>NTSC3L</b>   | - | 11190 | 1.061  | 365  | 590  | 290  | 2.033 | 1.024 | 0.21  | 0 |
| chr22 | 36622254  | 36636000  | <b>APOL2</b>    | - | 13746 | 1.518  | 642  | 1036 | 510  | 2.032 | 1.023 | 0.18  | 0 |
| chr9  | 37780307  | 37785067  | <b>EXOSC3</b>   | - | 4760  | 4.641  | 677  | 1094 | 538  | 2.032 | 1.023 | 0.181 | 0 |
| chr4  | 155456148 | 155471585 | <b>PLRG1</b>    | - | 15437 | 2.68   | 1286 | 2077 | 1022 | 2.031 | 1.022 | 0.142 | 0 |
| chr15 | 78575577  | 78591940  | <b>WDR61</b>    | - | 16363 | 1.982  | 1006 | 1624 | 800  | 2.03  | 1.021 | 0.149 | 0 |
| chr12 | 69979207  | 69995357  | <b>CCT2</b>     | + | 16150 | 4.069  | 2034 | 3284 | 1617 | 2.03  | 1.021 | 0.149 | 0 |
| chr19 | 55912649  | 55919325  | <b>UBE2S</b>    | - | 6676  | 5.737  | 1185 | 1913 | 942  | 2.03  | 1.021 | 0.149 | 0 |
| chr1  | 167885912 | 167906307 | <b>BRP44</b>    | - | 20395 | 2.196  | 1401 | 2260 | 1115 | 2.027 | 1.019 | 0.137 | 0 |
| chr14 | 35179587  | 35184029  | <b>CFL2</b>     | - | 4442  | 11.886 | 1664 | 2684 | 1325 | 2.026 | 1.019 | 0.129 | 0 |
| chrX  | 40440215  | 40465888  | <b>ATP6AP2</b>  | + | 25673 | 1.015  | 810  | 1306 | 645  | 2.025 | 1.018 | 0.154 | 0 |
| chr18 | 11851388  | 11854448  | <b>CHMP1B</b>   | + | 3060  | 7.018  | 653  | 1054 | 520  | 2.025 | 1.018 | 0.196 | 0 |
| chr15 | 89002708  | 89010633  | <b>MRPL46</b>   | - | 7925  | 2.004  | 489  | 788  | 390  | 2.02  | 1.015 | 0.194 | 0 |
| chr3  | 169490852 | 169507504 | <b>MYNN</b>     | + | 16652 | 2.88   | 1498 | 2410 | 1194 | 2.018 | 1.013 | 0.141 | 0 |
| chr17 | 56422538  | 56429563  | <b>SUPT4H1</b>  | - | 7025  | 1.182  | 256  | 412  | 204  | 2.017 | 1.012 | 0.234 | 0 |
| chr3  | 51991469  | 52001482  | <b>PCBP4</b>    | - | 10013 | 2.059  | 631  | 1015 | 503  | 2.015 | 1.011 | 0.192 | 0 |
| chr1  | 110026560 | 110035420 | <b>ATXN7L2</b>  | + | 8860  | 2.59   | 699  | 1124 | 557  | 2.015 | 1.011 | 0.195 | 0 |
| chr20 | 34129777  | 34145405  | <b>ERGIC3</b>   | + | 15628 | 1.72   | 828  | 1330 | 660  | 2.013 | 1.01  | 0.173 | 0 |
| chr2  | 85569077  | 85581821  | <b>INTSAT</b>   | - | 12744 | 1.177  | 459  | 737  | 366  | 2.013 | 1.009 | 0.214 | 0 |
| chr4  | 184426219 | 184432249 | <b>ING2</b>     | + | 6030  | 1.942  | 364  | 584  | 290  | 2.012 | 1.009 | 0.205 | 0 |
| chr1  | 154929501 | 154934258 | <b>PYGO2</b>    | - | 4757  | 3.311  | 480  | 771  | 383  | 2.012 | 1.009 | 0.217 | 0 |
| chr3  | 119388371 | 119396243 | <b>COX17</b>    | - | 7872  | 1.393  | 343  | 551  | 274  | 2.011 | 1.008 | 0.196 | 0 |
| chr2  | 18735988  | 18741959  | <b>RDH14</b>    | - | 5971  | 2.175  | 400  | 643  | 319  | 2.011 | 1.008 | 0.21  | 0 |

|                     |           |           |               |   |                |        |      |      |      |       |       |       |   |
|---------------------|-----------|-----------|---------------|---|----------------|--------|------|------|------|-------|-------|-------|---|
| chr19               | 57901217  | 57913919  | <b>ZNF548</b> | + | 12702          | 1.923  | 750  | 1203 | 599  | 2.009 | 1.006 | 0.184 | 0 |
| chr1                | 202101976 | 202113866 | <b>ARL8A</b>  | - | 11890          | 1.733  | 632  | 1014 | 505  | 2.007 | 1.005 | 0.192 | 0 |
| chr1                | 173446485 | 173457946 | <b>PRDX6</b>  | + | 11461          | 10.774 | 3900 | 6251 | 3116 | 2.006 | 1.004 | 0.147 | 0 |
| chr11               | 64008412  | 64011607  | <b>FKBP2</b>  | + | 3195           | 1.237  | 120  | 193  | 96   | 2.006 | 1.004 | 0.303 | 0 |
| chr4                | 666224    | 668127    | <b>ATP5I</b>  | - | 1903           | 2.944  | 174  | 278  | 139  | 2.004 | 1.003 | 0.256 | 0 |
| chr19               | 19030483  | 19039442  | <b>DDX49</b>  | + | 8959           | 1.175  | 321  | 515  | 257  | 2.003 | 1.002 | 0.241 | 0 |
| chr11               | 65729159  | 65747607  | <b>SART1</b>  | + | 18448          | 1.396  | 797  | 1277 | 638  | 2.001 | 1.001 | 0.17  | 0 |
| <b>sum</b>          |           |           |               |   | <b>8232857</b> |        |      |      |      |       |       |       |   |
| <b>average size</b> |           |           |               |   | <b>8920</b>    |        |      |      |      |       |       |       |   |

**Table S2B. Genes DOWN-regulated >2-fold following 45 min CPT treatment (CPT).**

| chrom | start     | end       | name       | strand | bp      | meanRPKM | meanCount | 1_CPT | 2_cont | foldChange | log2FoldChange | Adjusted | significant |
|-------|-----------|-----------|------------|--------|---------|----------|-----------|-------|--------|------------|----------------|----------|-------------|
| chr6  | 26271145  | 26271612  | HIST1H3G   | -      | 467     | 11.336   | 171       | 6     | 226    | 0.026      | -5.238216      | 0        | 1           |
| chr6  | 1312674   | 1314993   | FOXQ1      | +      | 2319    | 1.831    | 133       | 7     | 175    | 0.044      | -4.507032      | 0.001    | 1           |
| chr11 | 19372270  | 20143147  | NAV2       | +      | 770877  | 1.901    | 47753     | 4304  | 62236  | 0.069      | -3.853773      | 0.048    | 1           |
| chr12 | 1726221   | 1756378   | WNT5B      | +      | 30157   | 3.972    | 3936      | 365   | 5127   | 0.071      | -3.810714      | 0        | 1           |
| chr1  | 115828536 | 115880857 | NGF        | -      | 52321   | 5.566    | 9895      | 941   | 12880  | 0.073      | -3.773715      | 0.001    | 1           |
| chr18 | 57098170  | 57364644  | CCBE1      | -      | 266474  | 5.065    | 45435     | 4738  | 59000  | 0.08       | -3.638166      | 0.058    | 1           |
| chr8  | 70378858  | 70573147  | SULF1      | +      | 194289  | 5.248    | 36717     | 4351  | 47506  | 0.092      | -3.448683      | 0.056    | 1           |
| chr5  | 64444562  | 64777704  | ADAMTS6    | +      | 333142  | 2.078    | 24175     | 2893  | 31269  | 0.093      | -3.433711      | 0.023    | 1           |
| chr14 | 51955854  | 52197444  | FRMD6      | +      | 241590  | 14.097   | 117269    | 15262 | 151272 | 0.101      | -3.309075      | 0.435    | 0           |
| chr13 | 60239722  | 60738119  | DIAPH3     | -      | 498397  | 1.514    | 25642     | 3430  | 33046  | 0.104      | -3.267888      | 0.031    | 1           |
| chr14 | 73136659  | 73360809  | DPF3       | -      | 224150  | 1.681    | 12505     | 1668  | 16117  | 0.104      | -3.272259      | 0.006    | 1           |
| chr8  | 31497267  | 32622558  | NRG1       | +      | 1125291 | 1.296    | 49669     | 6660  | 64005  | 0.104      | -3.24425       | 0.105    | 0           |
| chr16 | 17196180  | 17564738  | XYLT1      | -      | 368558  | 1.638    | 20034     | 2834  | 25768  | 0.11       | -3.184347      | 0.021    | 1           |
| chr13 | 38210772  | 38443939  | TRPC4      | -      | 233167  | 1.666    | 13525     | 1932  | 17389  | 0.111      | -3.169752      | 0.012    | 1           |
| chr10 | 78629358  | 79397577  | KCNMA1     | -      | 768219  | 2.886    | 72829     | 10754 | 93520  | 0.115      | -3.120337      | 0.219    | 0           |
| chr10 | 49654078  | 49813138  | ADHGAP22   | -      | 159060  | 2.984    | 15426     | 2374  | 19776  | 0.12       | -3.057817      | 0.015    | 1           |
| chr12 | 120123594 | 120315095 | CIT        | -      | 191501  | 1.446    | 9191      | 1410  | 11784  | 0.12       | -3.062199      | 0.006    | 1           |
| chr22 | 46481876  | 46509808  | MIRLET7BHG | +      | 27932   | 5.437    | 4899      | 768   | 6276   | 0.122      | -3.029847      | 0.002    | 1           |
| chr5  | 113698015 | 113832197 | KCNN2      | +      | 134182  | 3.476    | 15624     | 2489  | 20002  | 0.124      | -3.006013      | 0.019    | 1           |
| chr5  | 126112314 | 126172712 | LMNB1      | +      | 60398   | 1.956    | 3955      | 636   | 5061   | 0.126      | -2.991573      | 0.002    | 1           |
| chr1  | 208195587 | 208417665 | PLXNA2     | -      | 222078  | 1.184    | 8886      | 1430  | 11371  | 0.126      | -2.99076       | 0.008    | 1           |
| chr7  | 83587658  | 83824217  | SEMA3A     | -      | 236559  | 2.401    | 19773     | 3186  | 25302  | 0.126      | -2.989319      | 0.033    | 1           |
| chr19 | 38397867  | 38699008  | SIPA1L3    | +      | 301141  | 1.493    | 14980     | 2413  | 19169  | 0.126      | -2.989599      | 0.018    | 1           |
| chr4  | 157682762 | 157892546 | PDGFC      | -      | 209784  | 3.713    | 26022     | 4493  | 33199  | 0.135      | -2.885262      | 0.056    | 1           |
| chr1  | 94027348  | 94147385  | BCAR3      | -      | 120037  | 7.572    | 30014     | 5191  | 38288  | 0.136      | -2.882673      | 0.067    | 1           |
| chr20 | 52183609  | 52199636  | ZNF217     | -      | 16027   | 8.383    | 4457      | 787   | 5680   | 0.139      | -2.850866      | 0.004    | 1           |
| chr7  | 55086724  | 55275031  | EGFR       | +      | 188307  | 4.235    | 26168     | 4682  | 33330  | 0.14       | -2.831587      | 0.057    | 1           |
| chr2  | 36583369  | 36778278  | CRIM1      | +      | 194909  | 25.278   | 170222    | 31017 | 216624 | 0.143      | -2.804045      | 0.86     | 0           |
| chr11 | 123396527 | 123493518 | GRAMD1B    | +      | 96991   | 1.404    | 4498      | 818   | 5724   | 0.143      | -2.806663      | 0.004    | 1           |
| chr1  | 201617449 | 201796102 | NAV1       | +      | 178653  | 3.391    | 20394     | 3715  | 25953  | 0.143      | -2.804313      | 0.044    | 1           |
| chr3  | 71003864  | 71633140  | FOXP1      | -      | 629276  | 1.369    | 29341     | 5382  | 37327  | 0.144      | -2.793782      | 0.079    | 1           |
| chr15 | 81071711  | 81243999  | KIAA1199   | +      | 172288  | 9.442    | 55888     | 10220 | 71111  | 0.144      | -2.798657      | 0.207    | 0           |
| chr10 | 80828791  | 81076285  | ZMIZ1      | +      | 247494  | 4.635    | 37377     | 6868  | 47547  | 0.144      | -2.791323      | 0.103    | 0           |
| chr12 | 66218239  | 66360071  | HMGA2      | +      | 141832  | 9.784    | 44384     | 8247  | 56430  | 0.146      | -2.774434      | 0.133    | 0           |
| chr16 | 56642477  | 56643409  | MT2A       | +      | 932     | 43.357   | 1285      | 239   | 1634   | 0.146      | -2.772028      | 0.002    | 1           |
| chr20 | 9049700   | 9461462   | PLCB4      | +      | 411762  | 4.461    | 65275     | 12107 | 82998  | 0.146      | -2.777229      | 0.275    | 0           |
| chr18 | 55313658  | 55470327  | ATP8B1     | -      | 156669  | 4.443    | 23221     | 4369  | 29505  | 0.148      | -2.75532       | 0.056    | 1           |
| chr3  | 42132745  | 42267268  | TRAK1      | +      | 134523  | 2.521    | 11170     | 2109  | 14190  | 0.149      | -2.749669      | 0.018    | 1           |
| chr16 | 87863628  | 87903100  | SLC7A5     | -      | 39472   | 5.033    | 6344      | 1211  | 8055   | 0.15       | -2.732687      | 0.007    | 1           |
| chr21 | 36160097  | 36421595  | RUNX1      | -      | 261498  | 4.259    | 36973     | 7065  | 46942  | 0.151      | -2.732         | 0.115    | 0           |
| chr9  | 82186877  | 82341656  | TLE4       | +      | 154779  | 21.798   | 117591    | 22664 | 149234 | 0.152      | -2.719074      | 0.571    | 0           |
| chr16 | 86600856  | 86602537  | FOXC2      | +      | 1681    | 2.462    | 128       | 24    | 162    | 0.153      | -2.707658      | 0.031    | 1           |
| chr2  | 235860627 | 235964358 | SH3BP4     | +      | 103731  | 6.912    | 23422     | 4652  | 29679  | 0.157      | -2.673523      | 0.061    | 1           |
| chr14 | 21668237  | 21675059  | LOC283624  | -      | 6822    | 7.523    | 1677      | 335   | 2125   | 0.158      | -2.663773      | 0.004    | 1           |
| chr12 | 27849427  | 27850566  | REP15      | +      | 1139    | 2.199    | 85        | 17    | 108    | 0.158      | -2.658454      | 0.068    | 1           |
| chr2  | 9346893   | 9545812   | ASAP2      | +      | 198919  | 1.969    | 12820     | 2596  | 16228  | 0.16       | -2.644012      | 0.027    | 1           |
| chr1  | 97543299  | 98386615  | DPYD       | -      | 843316  | 1.512    | 43859     | 8887  | 55517  | 0.16       | -2.643114      | 0.174    | 0           |
| chr17 | 18874380  | 18908060  | FAM83G     | -      | 33680   | 2.306    | 2507      | 512   | 3172   | 0.161      | -2.631214      | 0.004    | 1           |
| chr11 | 33563876  | 33695646  | C11orf41   | +      | 131770  | 1.503    | 6570      | 1348  | 8310   | 0.162      | -2.62383       | 0.012    | 1           |
| chr18 | 55711609  | 56068772  | NEDD4L     | +      | 357163  | 1.427    | 16557     | 3399  | 20943  | 0.162      | -2.623288      | 0.039    | 1           |
| chr19 | 45971252  | 45978437  | FOSB       | +      | 7185    | 19.393   | 4358      | 898   | 5512   | 0.163      | -2.616413      | 0.006    | 1           |
| chr17 | 75277491  | 75496678  | 9-Sep      | +      | 219187  | 3.117    | 22019     | 4623  | 27817  | 0.166      | -2.588836      | 0.062    | 1           |
| chr7  | 66018552  | 66043498  | LOC493754  | -      | 24946   | 1.96     | 1616      | 338   | 2042   | 0.166      | -2.591637      | 0.005    | 1           |
| chr2  | 207945528 | 208030614 | KLF7       | -      | 85086   | 7.664    | 22261     | 4694  | 28117  | 0.167      | -2.582525      | 0.073    | 1           |
| chr3  | 192514604 | 192635950 | MB21D2     | -      | 121346  | 4.193    | 16978     | 3610  | 21435  | 0.168      | -2.5699        | 0.049    | 1           |
| chr3  | 156977531 | 157221415 | VEPH1      | -      | 243884  | 1.007    | 8278      | 1760  | 10451  | 0.168      | -2.569334      | 0.02     | 1           |
| chr16 | 81478774  | 81745367  | CMIP       | +      | 266593  | 1.517    | 13239     | 2831  | 16709  | 0.169      | -2.561159      | 0.033    | 1           |
| chr14 | 95883830  | 95942173  | C14orf49   | -      | 58343   | 1.298    | 2439      | 522   | 3077   | 0.17       | -2.558938      | 0.005    | 1           |
| chr1  | 56960418  | 57045257  | PPAP2B     | -      | 84839   | 4.503    | 12714     | 2723  | 16045  | 0.17       | -2.558821      | 0.033    | 1           |
| chr5  | 14143828  | 14509458  | TRIO       | +      | 365630  | 8.003    | 98323     | 21057 | 124078 | 0.17       | -2.558812      | 0.485    | 0           |
| chr10 | 22823765  | 23003503  | PIP4K2A    | -      | 179738  | 2.811    | 16320     | 3591  | 20563  | 0.175      | -2.517561      | 0.046    | 1           |
| chr11 | 12132137  | 12285331  | MICAL2     | +      | 153194  | 4.832    | 24549     | 5442  | 30918  | 0.176      | -2.506254      | 0.088    | 1           |
| chr7  | 130565750 | 130598069 | LOC646329  | -      | 32319   | 40.216   | 42611     | 9480  | 53654  | 0.177      | -2.500747      | 0.178    | 0           |
| chr9  | 36572904  | 36677679  | MELK       | +      | 104775  | 1.407    | 4912      | 1108  | 6180   | 0.179      | -2.47959       | 0.014    | 1           |
| chr5  | 72921982  | 73237818  | RGNEF      | +      | 315836  | 1.232    | 12815     | 2892  | 16123  | 0.179      | -2.478987      | 0.038    | 1           |
| chr7  | 116312458 | 116438440 | MET        | +      | 125982  | 2.838    | 11942     | 2706  | 15020  | 0.18       | -2.472249      | 0.037    | 1           |
| chr9  | 113636053 | 113800365 | LPAR1      | -      | 164312  | 6.525    | 35699     | 8200  | 44866  | 0.183      | -2.451872      | 0.154    | 0           |

|       |           |           |              |   |        |        |        |       |        |       |           |       |   |
|-------|-----------|-----------|--------------|---|--------|--------|--------|-------|--------|-------|-----------|-------|---|
| chr5  | 178537851 | 178772431 | ADAMTS2      | - | 234580 | 2.107  | 16276  | 3780  | 20441  | 0.185 | -2.434774 | 0.057 | 1 |
| chr9  | 126141932 | 126692417 | ENND1A       | - | 550485 | 1.32   | 23898  | 5550  | 30014  | 0.185 | -2.434845 | 0.093 | 1 |
| chr2  | 121554866 | 121750229 | GLI2         | + | 195363 | 1.525  | 9873   | 2288  | 12401  | 0.185 | -2.438204 | 0.031 | 1 |
| chr18 | 46065426  | 46389586  | CTIF         | + | 324160 | 2.737  | 29545  | 6939  | 37080  | 0.187 | -2.417738 | 0.13  | 0 |
| chr7  | 137559724 | 137686846 | CRFB3L2      | - | 127122 | 5.02   | 21439  | 5051  | 26902  | 0.188 | -2.41286  | 0.089 | 1 |
| chr5  | 172741725 | 172756506 | STC2         | - | 14781  | 16.337 | 7625   | 1796  | 9568   | 0.188 | -2.413577 | 0.02  | 1 |
| chr5  | 9035137   | 9546233   | SEMA5A       | - | 511096 | 2.318  | 39400  | 9343  | 49419  | 0.189 | -2.403017 | 0.187 | 0 |
| chr1  | 66999824  | 67210768  | SGIP1        | + | 210944 | 8.001  | 56589  | 13409 | 70982  | 0.189 | -2.404161 | 0.288 | 0 |
| chr2  | 40339285  | 40739575  | SLC8A1       | - | 400290 | 2.077  | 29308  | 6961  | 36757  | 0.189 | -2.400675 | 0.149 | 0 |
| chr19 | 47421932  | 47508333  | ARHGAP35     | + | 86401  | 3.266  | 9324   | 2226  | 11690  | 0.19  | -2.39243  | 0.032 | 1 |
| chr8  | 118811601 | 119124058 | EXT1         | - | 312457 | 12.071 | 127077 | 30309 | 159333 | 0.19  | -2.394191 | 0.676 | 0 |
| chr1  | 240255184 | 240638489 | FMN2         | + | 383305 | 5.771  | 76070  | 18098 | 95394  | 0.19  | -2.398066 | 0.414 | 0 |
| chr19 | 13945329  | 13947100  | LOC284454    | - | 1771   | 36.218 | 2041   | 487   | 2559   | 0.19  | -2.393617 | 0.008 | 1 |
| chr7  | 36429431  | 36493400  | ANLN         | + | 63969  | 4.914  | 10569  | 2529  | 13249  | 0.191 | -2.38907  | 0.039 | 1 |
| chr22 | 46692637  | 46726707  | GTSE1        | + | 34070  | 1.355  | 1498   | 358   | 1878   | 0.191 | -2.389198 | 0.008 | 1 |
| chr14 | 71996041  | 72206120  | SIPA1L1      | + | 210079 | 3.134  | 22371  | 5348  | 28045  | 0.191 | -2.390549 | 0.099 | 1 |
| chr12 | 64238540  | 64541613  | SRGAP1       | + | 303073 | 4.751  | 48856  | 11692 | 61244  | 0.191 | -2.388947 | 0.254 | 0 |
| chr5  | 169290718 | 169407744 | FAM196B      | - | 117026 | 2.193  | 8656   | 2093  | 10843  | 0.193 | -2.372824 | 0.033 | 1 |
| chr18 | 52889561  | 53303188  | CTCF         | - | 413627 | 2.958  | 42907  | 10362 | 53755  | 0.193 | -2.375036 | 0.236 | 0 |
| chr19 | 15348300  | 15391262  | BRD4         | - | 42962  | 3.561  | 4959   | 1205  | 6211   | 0.194 | -2.365763 | 0.016 | 1 |
| chr13 | 30083550  | 30169825  | SLC7A1       | - | 86275  | 5.274  | 14975  | 3634  | 18755  | 0.194 | -2.367664 | 0.058 | 1 |
| chr4  | 148653452 | 148993927 | ARHGAP10     | + | 340475 | 1.776  | 20158  | 4912  | 25239  | 0.195 | -2.361076 | 0.088 | 1 |
| chr3  | 29322802  | 30051886  | RBM53        | + | 729084 | 1.178  | 29729  | 7274  | 37214  | 0.195 | -2.355018 | 0.154 | 0 |
| chr4  | 114372187 | 114683083 | CAMK2D       | - | 310896 | 3.341  | 34955  | 8569  | 43750  | 0.196 | -2.352067 | 0.176 | 0 |
| chr6  | 57182421  | 57513376  | PRIM2        | + | 330955 | 1.633  | 17874  | 4375  | 22373  | 0.196 | -2.354135 | 0.074 | 1 |
| chr4  | 99391517  | 99579812  | TSPAN5       | - | 188295 | 4.272  | 26742  | 6566  | 33467  | 0.196 | -2.349561 | 0.125 | 0 |
| chr9  | 99148224  | 99180669  | ZNF367       | - | 32445  | 1.289  | 1389   | 341   | 1738   | 0.196 | -2.348708 | 0.011 | 1 |
| chr9  | 128199672 | 128469513 | MAPKAP1      | - | 269841 | 1.869  | 16733  | 4120  | 20937  | 0.197 | -2.345278 | 0.071 | 1 |
| chr4  | 150999425 | 151178608 | DCLK2        | + | 179183 | 10.743 | 66443  | 16429 | 83114  | 0.198 | -2.338861 | 0.377 | 0 |
| chr18 | 25530929  | 25757445  | CDH2         | - | 226516 | 5.188  | 40999  | 10194 | 51267  | 0.199 | -2.330251 | 0.233 | 0 |
| chr4  | 160188997 | 160281301 | RARGEF2      | + | 92304  | 1.871  | 5998   | 1494  | 7499   | 0.199 | -2.327604 | 0.029 | 1 |
| chr1  | 162602227 | 162750247 | DDR2         | + | 148020 | 4.189  | 20531  | 5128  | 25665  | 0.2   | -2.323065 | 0.094 | 1 |
| chr8  | 25042286  | 25270619  | DOCK5        | + | 228333 | 4.358  | 33531  | 8465  | 41886  | 0.202 | -2.306839 | 0.178 | 0 |
| chr4  | 16503164  | 16900424  | LDB2         | - | 397260 | 1.12   | 15527  | 3909  | 19400  | 0.202 | -2.311062 | 0.082 | 1 |
| chr17 | 78518624  | 78940173  | RPTOR        | - | 421549 | 1.568  | 21578  | 5443  | 26957  | 0.202 | -2.308006 | 0.097 | 1 |
| chr2  | 168810529 | 169104105 | STK39        | - | 293576 | 1.734  | 16954  | 4275  | 21181  | 0.202 | -2.30861  | 0.078 | 1 |
| chr8  | 128806778 | 129113499 | PVT1         | + | 306721 | 2.625  | 26322  | 6684  | 32868  | 0.203 | -2.297722 | 0.127 | 0 |
| chr9  | 118916070 | 119164600 | PAPPA        | + | 248530 | 1.139  | 9494   | 2421  | 11852  | 0.204 | -2.29134  | 0.043 | 1 |
| chr4  | 72053002  | 72437804  | SLC4A4       | + | 384802 | 1.173  | 15686  | 3991  | 19584  | 0.204 | -2.294622 | 0.084 | 1 |
| chr15 | 67358194  | 67487533  | SMAD3        | + | 129339 | 6.379  | 26537  | 6753  | 33131  | 0.204 | -2.294524 | 0.123 | 0 |
| chr5  | 148521053 | 148639999 | ABLIM3       | + | 118946 | 1.775  | 6950   | 1782  | 8673   | 0.205 | -2.282818 | 0.03  | 1 |
| chr14 | 101361106 | 101373305 | MGB8         | - | 12199  | 2.398  | 960    | 246   | 1198   | 0.205 | -2.283005 | 0.015 | 1 |
| chr9  | 37915894  | 38069210  | SHB          | + | 153316 | 2.7    | 13605  | 3482  | 16980  | 0.205 | -2.285764 | 0.061 | 1 |
| chr5  | 140787769 | 140790232 | PCDHGB6      | + | 2463   | 1.336  | 106    | 27    | 133    | 0.206 | -2.280421 | 0.088 | 1 |
| chr2  | 56411257  | 56613309  | CCDC85A      | + | 202052 | 7.901  | 56132  | 14476 | 70017  | 0.207 | -2.273964 | 0.346 | 0 |
| chr8  | 119201694 | 119634184 | SAMD12       | - | 432490 | 1.201  | 17679  | 4567  | 22050  | 0.207 | -2.27143  | 0.094 | 1 |
| chr4  | 1873122   | 1983934   | WHSC1        | + | 110812 | 2.467  | 9002   | 2320  | 11230  | 0.207 | -2.275162 | 0.039 | 1 |
| chr9  | 112810877 | 112934791 | AKAP2        | + | 123914 | 6.397  | 25984  | 6749  | 32396  | 0.208 | -2.263047 | 0.133 | 0 |
| chr10 | 128594022 | 129250780 | DOCK1        | + | 656758 | 1.152  | 24909  | 6449  | 31062  | 0.208 | -2.267823 | 0.127 | 0 |
| chr19 | 18367905  | 18385319  | KIAA1683     | - | 17414  | 1.037  | 587    | 152   | 732    | 0.208 | -2.262121 | 0.021 | 1 |
| chr4  | 20255234  | 20620788  | SLIT2        | + | 365554 | 3.167  | 39429  | 10241 | 49159  | 0.208 | -2.26301  | 0.229 | 0 |
| chr5  | 95220801  | 95297775  | ELL2         | - | 76974  | 22.967 | 61878  | 16098 | 77138  | 0.209 | -2.260493 | 0.38  | 0 |
| chr17 | 64298925  | 64806862  | PRKCA        | + | 507937 | 3.728  | 63065  | 16459 | 78601  | 0.209 | -2.255671 | 0.363 | 0 |
| chr9  | 18474078  | 18910947  | ADAMTSL1     | + | 436869 | 1.336  | 18953  | 4963  | 23616  | 0.21  | -2.250387 | 0.091 | 1 |
| chr20 | 45838380  | 45985474  | ZMYND8       | - | 147094 | 1.323  | 6427   | 1678  | 8011   | 0.21  | -2.254821 | 0.03  | 1 |
| chr5  | 137801180 | 137805004 | EGR1         | + | 3824   | 46.097 | 5533   | 1452  | 6893   | 0.211 | -2.246322 | 0.021 | 1 |
| chr1  | 156495196 | 156542396 | IQGAP3       | - | 47200  | 1.647  | 2558   | 676   | 3185   | 0.212 | -2.235122 | 0.017 | 1 |
| chr12 | 11182985  | 11184006  | TAS2R31      | - | 1021   | 1.147  | 38     | 10    | 48     | 0.213 | -2.233204 | 0.206 | 0 |
| chr8  | 131064350 | 131455906 | ASAP1        | - | 391556 | 6.319  | 82190  | 21864 | 102299 | 0.214 | -2.226155 | 0.479 | 0 |
| chr2  | 27615489  | 27616443  | FTH1P3       | - | 954    | 1.026  | 32     | 8     | 40     | 0.214 | -2.223442 | 0.227 | 0 |
| chr7  | 139246315 | 139477693 | HIPK2        | - | 231378 | 1.751  | 13438  | 3578  | 16724  | 0.214 | -2.224642 | 0.069 | 1 |
| chr3  | 151985828 | 152183569 | MBNL1        | + | 197741 | 8.867  | 59627  | 15853 | 74218  | 0.214 | -2.226975 | 0.361 | 0 |
| chr2  | 225629806 | 225907330 | DOCK10       | - | 277524 | 4.598  | 43330  | 11588 | 53911  | 0.215 | -2.21794  | 0.266 | 0 |
| chr3  | 127407908 | 127542051 | MGLL         | - | 134143 | 1.51   | 6607   | 1764  | 8222   | 0.215 | -2.220448 | 0.032 | 1 |
| chr10 | 33466418  | 33623833  | NRP1         | - | 157415 | 8.389  | 43935  | 11776 | 54655  | 0.215 | -2.214391 | 0.259 | 0 |
| chr1  | 197053256 | 197115824 | ASPM         | - | 62568  | 3.07   | 6452   | 1735  | 8025   | 0.216 | -2.209507 | 0.035 | 1 |
| chr2  | 66662531  | 66799891  | MEIS1        | + | 137360 | 6.998  | 32708  | 8798  | 40679  | 0.216 | -2.209012 | 0.2   | 0 |
| chr3  | 27257096  | 27410912  | NEK10        | - | 153816 | 1.755  | 8953   | 2405  | 11135  | 0.216 | -2.210625 | 0.047 | 1 |
| chr1  | 214776531 | 214837914 | CENPF        | + | 61383  | 2.445  | 4986   | 1347  | 6199   | 0.217 | -2.201866 | 0.028 | 1 |
| chr1  | 85784167  | 86044046  | DDAH1        | - | 259879 | 7.92   | 69782  | 18852 | 86759  | 0.217 | -2.20223  | 0.427 | 0 |
| chr1  | 180238797 | 180243816 | LOC100527964 | - | 5019   | 1.477  | 238    | 64    | 297    | 0.217 | -2.207359 | 0.053 | 1 |

|       |           |           |              |   |        |        |       |       |       |       |           |       |   |
|-------|-----------|-----------|--------------|---|--------|--------|-------|-------|-------|-------|-----------|-------|---|
| chr11 | 58389023  | 58390145  | ZFP91-CNTF   | + | 1122   | 3.468  | 130   | 35    | 162   | 0.217 | -2.206482 | 0.096 | 1 |
| chr6  | 45296053  | 45518819  | RUNX2        | + | 222766 | 1.772  | 13177 | 3564  | 16381 | 0.218 | -2.200293 | 0.072 | 1 |
| chr1  | 243651534 | 244006886 | AKT3         | - | 355352 | 1.889  | 22801 | 6219  | 28328 | 0.22  | -2.187482 | 0.139 | 0 |
| chr11 | 58390145  | 58393205  | CNTF         | + | 3060   | 4.304  | 427   | 116   | 530   | 0.22  | -2.186432 | 0.034 | 1 |
| chr13 | 110959630 | 111165373 | COL4A2       | + | 205743 | 2.039  | 13948 | 3818  | 17325 | 0.22  | -2.181804 | 0.078 | 1 |
| chr10 | 126676417 | 126849624 | CTBP2        | - | 173207 | 2.626  | 14878 | 4089  | 18474 | 0.221 | -2.175589 | 0.08  | 1 |
| chr17 | 55333930  | 557537299 | MSI2         | + | 423369 | 1.318  | 18495 | 5086  | 22965 | 0.221 | -2.174866 | 0.106 | 0 |
| chr4  | 170015406 | 170192249 | SH3RF1       | - | 176843 | 3.835  | 22874 | 6265  | 28411 | 0.221 | -2.180971 | 0.139 | 0 |
| chr5  | 1253286   | 1295162   | TERT         | - | 41876  | 1.789  | 2382  | 654   | 2958  | 0.221 | -2.176812 | 0.016 | 1 |
| chr16 | 72816785  | 73092534  | ZFH3         | - | 275749 | 2.614  | 24011 | 6581  | 29821 | 0.221 | -2.179967 | 0.142 | 0 |
| chr3  | 63989697  | 63997917  | LOC100507062 | + | 8220   | 2.628  | 725   | 199   | 900   | 0.222 | -2.172226 | 0.027 | 1 |
| chr12 | 11174270  | 11175170  | TAS2R19      | - | 900    | 1.541  | 46    | 12    | 57    | 0.222 | -2.170703 | 0.205 | 0 |
| chr8  | 126104082 | 126379367 | NSMCE2       | + | 275285 | 1.052  | 9657  | 2669  | 11986 | 0.223 | -2.166994 | 0.057 | 1 |
| chr2  | 215593274 | 215674428 | BARD1        | - | 81154  | 2.271  | 6117  | 1702  | 7589  | 0.224 | -2.156305 | 0.037 | 1 |
| chr3  | 172472297 | 172539263 | ECT2         | + | 66966  | 2.032  | 4549  | 1271  | 5642  | 0.225 | -2.150311 | 0.031 | 1 |
| chr22 | 50171537  | 50173958  | LOC90834     | - | 2421   | 2.18   | 172   | 48    | 213   | 0.225 | -2.154718 | 0.078 | 1 |
| chr8  | 59717976  | 60031767  | TOX          | - | 313791 | 2.74   | 29188 | 8130  | 36207 | 0.225 | -2.154821 | 0.189 | 0 |
| chr10 | 60272903  | 60588845  | BICC1        | + | 315942 | 2.654  | 27976 | 7854  | 34683 | 0.226 | -2.142629 | 0.177 | 0 |
| chr3  | 187896330 | 187898596 | FLJ42393     | + | 2266   | 3.129  | 229   | 64    | 285   | 0.226 | -2.14767  | 0.062 | 1 |
| chr6  | 128289923 | 128841870 | PTPRK        | - | 551947 | 4.193  | 77393 | 21704 | 95956 | 0.226 | -2.144377 | 0.48  | 0 |
| chr12 | 66151800  | 66220754  | RPSAP52      | - | 68954  | 1.169  | 2568  | 719   | 3184  | 0.226 | -2.145975 | 0.018 | 1 |
| chr1  | 46085715  | 46089731  | CCDC17       | - | 4016   | 1.067  | 137   | 38    | 170   | 0.227 | -2.139969 | 0.089 | 1 |
| chr4  | 2627158   | 2734302   | FAM193A      | + | 107144 | 1.597  | 5635  | 1585  | 6985  | 0.227 | -2.139907 | 0.035 | 1 |
| chr6  | 26033319  | 26033796  | HIST1H2AB    | - | 477    | 2.908  | 45    | 12    | 56    | 0.228 | -2.13494  | 0.206 | 0 |
| chr3  | 11178778  | 11304939  | HRH1         | + | 126161 | 1.316  | 5422  | 1529  | 6720  | 0.228 | -2.135781 | 0.033 | 1 |
| chr12 | 72666528  | 73059422  | TRHD         | + | 392894 | 2.435  | 32500 | 9183  | 40273 | 0.228 | -2.132733 | 0.218 | 0 |
| chr6  | 144612872 | 145174170 | UTRN         | + | 561298 | 1.823  | 34443 | 9729  | 42681 | 0.228 | -2.133142 | 0.227 | 0 |
| chr7  | 31792631  | 32338383  | PDE1C        | - | 545752 | 2.915  | 53883 | 15273 | 66753 | 0.229 | -2.127799 | 0.355 | 0 |
| chr20 | 44441254  | 44445596  | UBE2C        | + | 4342   | 3.45   | 487   | 138   | 604   | 0.229 | -2.1297   | 0.035 | 1 |
| chr19 | 36545782  | 36596012  | WDR62        | + | 50230  | 1.137  | 1846  | 523   | 2287  | 0.229 | -2.128249 | 0.019 | 1 |
| chr22 | 42556018  | 42611445  | TCF20        | - | 55427  | 1.073  | 1969  | 560   | 2439  | 0.23  | -2.122752 | 0.022 | 1 |
| chr13 | 97874573  | 98046374  | MBNL2        | + | 171801 | 6.038  | 35900 | 10293 | 44436 | 0.232 | -2.110066 | 0.258 | 0 |
| chr15 | 40453209  | 40513337  | BUB1B        | + | 60128  | 1.092  | 2175  | 626   | 2691  | 0.233 | -2.101996 | 0.024 | 1 |
| chr7  | 42000547  | 42276618  | GLI3         | - | 276071 | 1.344  | 12222 | 3525  | 15121 | 0.233 | -2.100905 | 0.077 | 1 |
| chr8  | 23154409  | 23261722  | LOXL2        | - | 107313 | 6.271  | 22095 | 6376  | 27334 | 0.233 | -2.100006 | 0.14  | 0 |
| chr20 | 42543491  | 42698254  | TOX2         | + | 154763 | 1.125  | 5699  | 1644  | 7050  | 0.233 | -2.100405 | 0.037 | 1 |
| chr17 | 13399005  | 13505244  | HS3ST3A1     | - | 106239 | 1.633  | 5790  | 1675  | 7162  | 0.234 | -2.095506 | 0.043 | 1 |
| chr7  | 127292201 | 127732659 | SNDB1        | + | 440458 | 2.56   | 37437 | 10821 | 46309 | 0.234 | -2.097427 | 0.249 | 0 |
| chr12 | 109176465 | 109251359 | SSH1         | + | 74894  | 8.383  | 20526 | 5938  | 25389 | 0.234 | -2.09603  | 0.131 | 0 |
| chr7  | 92234234  | 92465941  | CDK6         | - | 231707 | 4.515  | 35317 | 10250 | 43673 | 0.235 | -2.091087 | 0.246 | 0 |
| chr5  | 108083522 | 108523373 | FER          | + | 439851 | 1.296  | 19183 | 5571  | 23720 | 0.235 | -2.08997  | 0.135 | 0 |
| chr5  | 16662015  | 16936385  | MYO10        | - | 274370 | 3.306  | 30302 | 8796  | 37471 | 0.235 | -2.090792 | 0.207 | 0 |
| chr15 | 81293294  | 81296345  | MESDC1       | + | 3051   | 4.203  | 402   | 117   | 496   | 0.236 | -2.08033  | 0.04  | 1 |
| chr13 | 33677271  | 34250932  | STARD13      | - | 573661 | 1.301  | 25036 | 7304  | 30947 | 0.236 | -2.083057 | 0.174 | 0 |
| chr11 | 109964086 | 110042566 | ZC3H12C      | + | 78480  | 1.768  | 4598  | 1338  | 5684  | 0.236 | -2.086142 | 0.035 | 1 |
| chr6  | 16299342  | 16761721  | ATXN1        | - | 462379 | 2.73   | 41744 | 12283 | 51564 | 0.238 | -2.069631 | 0.282 | 0 |
| chr14 | 55034329  | 55260033  | SAMD4A       | + | 225704 | 4.364  | 32809 | 9658  | 40527 | 0.238 | -2.069022 | 0.228 | 0 |
| chr6  | 33589155  | 33664348  | ITPR3        | + | 75193  | 1.602  | 3834  | 1133  | 4734  | 0.239 | -2.063003 | 0.028 | 1 |
| chr12 | 96051582  | 96184536  | NTN4         | - | 132954 | 3.25   | 14681 | 4339  | 18129 | 0.239 | -2.062849 | 0.111 | 0 |
| chr5  | 140782519 | 140785006 | PCDHGA9      | + | 2487   | 1.555  | 124   | 36    | 154   | 0.239 | -2.06455  | 0.109 | 0 |
| chr5  | 98104998  | 98132198  | RGMB         | + | 27200  | 25.724 | 23067 | 6809  | 28487 | 0.239 | -2.064756 | 0.155 | 0 |
| chr16 | 70721341  | 70835061  | VC14         | - | 113720 | 1.755  | 6356  | 1879  | 7849  | 0.239 | -2.062448 | 0.04  | 1 |
| chr4  | 40812043  | 41216635  | APBB2        | - | 404592 | 1.613  | 21704 | 6423  | 26797 | 0.24  | -2.060743 | 0.151 | 0 |
| chr11 | 12695968  | 12966284  | TEAD1        | + | 270316 | 4.319  | 38880 | 11519 | 48001 | 0.24  | -2.058983 | 0.274 | 0 |
| chr1  | 210111537 | 210337633 | SYT14        | + | 226096 | 1.301  | 9460  | 2815  | 11674 | 0.241 | -2.051795 | 0.062 | 1 |
| chr20 | 39807088  | 39928739  | ZHX3         | - | 121651 | 2.573  | 10495 | 3122  | 12953 | 0.241 | -2.052368 | 0.079 | 1 |
| chr6  | 157099063 | 157531913 | ARID1B       | + | 432850 | 1.731  | 25171 | 7542  | 31047 | 0.243 | -2.041377 | 0.187 | 0 |
| chr9  | 16409500  | 16870786  | BNC2         | - | 461286 | 1.698  | 26176 | 7846  | 32286 | 0.243 | -2.040859 | 0.191 | 0 |
| chr15 | 59428562  | 59665071  | MYO1E        | - | 236509 | 1.671  | 12975 | 3886  | 16004 | 0.243 | -2.042059 | 0.091 | 1 |
| chr9  | 127019884 | 127114719 | NEK6         | + | 94835  | 4.115  | 12557 | 3769  | 15486 | 0.243 | -2.038551 | 0.083 | 1 |
| chr3  | 27414213  | 27498245  | SLC4A7       | - | 84032  | 6.661  | 19113 | 5727  | 23575 | 0.243 | -2.041258 | 0.149 | 0 |
| chr9  | 128509616 | 128729655 | PBX3         | + | 220039 | 5.186  | 37197 | 11198 | 45863 | 0.244 | -2.033986 | 0.256 | 0 |
| chr4  | 48499379  | 48782316  | FRYL         | - | 282937 | 1.494  | 14286 | 4321  | 17607 | 0.245 | -2.026769 | 0.113 | 0 |
| chr15 | 99192760  | 99507759  | IGF1R        | + | 314999 | 1.788  | 18859 | 5688  | 23249 | 0.245 | -2.031145 | 0.141 | 0 |
| chr10 | 91461366  | 91534700  | KIF20B       | + | 73334  | 1.281  | 3146  | 948   | 3879  | 0.245 | -2.032053 | 0.035 | 1 |
| chr3  | 187871662 | 188608460 | LPP          | + | 736798 | 2.26   | 55708 | 16851 | 68661 | 0.245 | -2.026655 | 0.39  | 0 |
| chr4  | 7760439   | 7941653   | AFAP1        | - | 181214 | 2.707  | 16118 | 4893  | 19860 | 0.246 | -2.020824 | 0.117 | 0 |
| chr4  | 81187741  | 81212171  | FGF5         | + | 24430  | 15.032 | 12056 | 3653  | 14857 | 0.246 | -2.023779 | 0.088 | 1 |
| chr15 | 58983301  | 58985324  | HSP90AB4P    | - | 2023   | 1.04   | 70    | 21    | 87    | 0.246 | -2.021172 | 0.191 | 0 |
| chr4  | 177604690 | 177713895 | VEGFC        | - | 109205 | 11.614 | 41935 | 12717 | 51674 | 0.246 | -2.022607 | 0.3   | 0 |
| chr12 | 77415025  | 77459360  | E2F7         | - | 44335  | 2.476  | 3595  | 1092  | 4429  | 0.247 | -2.01932  | 0.034 | 1 |

|       |           |           |                  |   |        |        |       |       |       |       |           |       |   |
|-------|-----------|-----------|------------------|---|--------|--------|-------|-------|-------|-------|-----------|-------|---|
| chr11 | 28042162  | 28129746  | <b>KIF18A</b>    | - | 87584  | 1.843  | 5451  | 1656  | 6717  | 0.247 | -2.019984 | 0.052 | 1 |
| chr13 | 52158483  | 52336171  | <b>WDFY2</b>     | + | 177688 | 2.415  | 14167 | 4338  | 17444 | 0.249 | -2.007607 | 0.107 | 0 |
| chr1  | 209848669 | 209849735 | <b>G0S2</b>      | + | 1066   | 5.154  | 175   | 54    | 215   | 0.25  | -1.997457 | 0.095 | 1 |
| chr6  | 158402887 | 158520207 | <b>SYNJ2</b>     | + | 117320 | 2.512  | 9560  | 2955  | 11762 | 0.251 | -1.992623 | 0.072 | 1 |
| chrX  | 9431334   | 9687780   | <b>TBL1X</b>     | + | 256446 | 1.124  | 9492  | 2935  | 11678 | 0.251 | -1.991963 | 0.076 | 1 |
| chr10 | 125505151 | 125651500 | <b>CPXM2</b>     | - | 146349 | 1.617  | 7703  | 2386  | 9475  | 0.252 | -1.988962 | 0.062 | 1 |
| chr6  | 148663728 | 148873184 | <b>SASH1</b>     | + | 209456 | 2.395  | 16554 | 5140  | 20359 | 0.253 | -1.985589 | 0.131 | 0 |
| chr17 | 61086897  | 61505067  | <b>TANC2</b>     | + | 418170 | 3.087  | 44213 | 13753 | 54367 | 0.253 | -1.982986 | 0.347 | 0 |
| chr6  | 42192668  | 42419783  | <b>TRERF1</b>    | - | 227115 | 1.87   | 13870 | 4307  | 17057 | 0.253 | -1.985555 | 0.105 | 0 |
| chr11 | 128328655 | 128457453 | <b>ETS1</b>      | - | 128798 | 3.937  | 16570 | 5177  | 20368 | 0.254 | -1.975898 | 0.129 | 0 |
| chr4  | 5712923   | 5816031   | <b>EVC</b>       | + | 103108 | 2.206  | 7419  | 2314  | 9121  | 0.254 | -1.978874 | 0.062 | 1 |
| chr6  | 15246526  | 15522253  | <b>JARID2</b>    | + | 275727 | 2.141  | 19215 | 5996  | 23621 | 0.254 | -1.977805 | 0.144 | 0 |
| chr10 | 94352824  | 94415152  | <b>KIF11</b>     | + | 62328  | 1.624  | 3384  | 1059  | 4159  | 0.255 | -1.973337 | 0.042 | 1 |
| chr11 | 95711439  | 96076344  | <b>PCML2</b>     | - | 364905 | 4.177  | 51934 | 16266 | 63824 | 0.255 | -1.972238 | 0.397 | 0 |
| chr5  | 140800536 | 140803653 | <b>PCDHGA11</b>  | + | 3117   | 1.948  | 197   | 61    | 242   | 0.255 | -1.971895 | 0.097 | 1 |
| chr12 | 116396380 | 116714991 | <b>MED13L</b>    | - | 318611 | 3.853  | 41760 | 13125 | 51305 | 0.256 | -1.966784 | 0.335 | 0 |
| chr10 | 134351352 | 134596984 | <b>INPP5A</b>    | + | 245632 | 1.024  | 8247  | 2611  | 10126 | 0.258 | -1.955056 | 0.072 | 1 |
| chr1  | 165796731 | 165880855 | <b>UCK2</b>      | + | 84124  | 2.012  | 5534  | 1751  | 6795  | 0.258 | -1.956127 | 0.053 | 1 |
| chr10 | 75910942  | 76469061  | <b>ADK</b>       | + | 558119 | 1.598  | 29834 | 9500  | 36612 | 0.259 | -1.946229 | 0.245 | 0 |
| chr12 | 2162415   | 2807115   | <b>CACNA1C</b>   | + | 644700 | 2.616  | 55275 | 17558 | 67847 | 0.259 | -1.950122 | 0.4   | 0 |
| chr20 | 54944444  | 54967351  | <b>AURKA</b>     | - | 22907  | 1.735  | 1314  | 419   | 1612  | 0.26  | -1.943282 | 0.035 | 1 |
| chr9  | 97488950  | 97849500  | <b>C9orf3</b>    | + | 360550 | 1.985  | 23699 | 7588  | 29070 | 0.261 | -1.937582 | 0.196 | 0 |
| chr13 | 110801309 | 110959496 | <b>COL4A1</b>    | - | 158187 | 1.729  | 9075  | 2900  | 11133 | 0.261 | -1.940393 | 0.084 | 1 |
| chr3  | 45636322  | 45722755  | <b>LIMD1</b>     | + | 86433  | 1.336  | 3764  | 1204  | 4617  | 0.261 | -1.939163 | 0.043 | 1 |
| chr1  | 170633312 | 170708541 | <b>PRRX1</b>     | + | 75229  | 4.988  | 12271 | 3934  | 15051 | 0.261 | -1.935734 | 0.103 | 0 |
| chr9  | 80335190  | 80646219  | <b>GNAQ</b>      | - | 311029 | 1.711  | 17786 | 5735  | 21803 | 0.263 | -1.926617 | 0.157 | 0 |
| chr2  | 238395877 | 238463961 | <b>MLPH</b>      | + | 68084  | 1.703  | 3715  | 1202  | 4553  | 0.264 | -1.920885 | 0.041 | 1 |
| chr19 | 11257830  | 11266484  | <b>SPC24</b>     | - | 8654   | 1.207  | 339   | 109   | 416   | 0.264 | -1.923006 | 0.075 | 1 |
| chr9  | 100961279 | 101018003 | <b>TBC1D2</b>    | - | 56724  | 1.837  | 3366  | 1088  | 4126  | 0.264 | -1.922631 | 0.04  | 1 |
| chr13 | 95672082  | 95953687  | <b>ABCC4</b>     | - | 281605 | 1.132  | 10387 | 3373  | 12725 | 0.265 | -1.91554  | 0.093 | 1 |
| chr11 | 43918852  | 43921424  | <b>LOC729799</b> | + | 2572   | 1.759  | 145   | 47    | 178   | 0.265 | -1.918123 | 0.126 | 0 |
| chr21 | 16333555  | 16437126  | <b>NRIP1</b>     | - | 103571 | 4.096  | 14308 | 4647  | 17528 | 0.265 | -1.915096 | 0.137 | 0 |
| chr4  | 95373037  | 95589377  | <b>PDLLIM5</b>   | + | 216340 | 4.274  | 31088 | 10094 | 38086 | 0.265 | -1.915743 | 0.268 | 0 |
| chr15 | 60639349  | 60690185  | <b>ANXA2</b>     | - | 50836  | 27.695 | 46940 | 15291 | 57489 | 0.266 | -1.910544 | 0.373 | 0 |
| chr3  | 67410883  | 67705038  | <b>SUCLG2</b>    | - | 294155 | 1.785  | 17272 | 5623  | 21155 | 0.266 | -1.911651 | 0.15  | 0 |
| chr20 | 30326903  | 30389603  | <b>TPX2</b>      | + | 62700  | 2.117  | 4402  | 1433  | 5392  | 0.266 | -1.911698 | 0.055 | 1 |
| chr14 | 69340839  | 69446083  | <b>ACTN1</b>     | - | 105244 | 11.846 | 40650 | 13285 | 49772 | 0.267 | -1.905476 | 0.321 | 0 |
| chr6  | 129898239 | 130031370 | <b>ARHGAP18</b>  | - | 133131 | 3.811  | 17279 | 5658  | 21152 | 0.267 | -1.902434 | 0.169 | 0 |
| chr16 | 23690200  | 23701688  | <b>PLK1</b>      | + | 11488  | 3.731  | 1392  | 455   | 1704  | 0.267 | -1.903824 | 0.036 | 1 |
| chr1  | 178062863 | 178448648 | <b>RASAL2</b>    | + | 385785 | 1.87   | 24073 | 7856  | 29479 | 0.267 | -1.907772 | 0.214 | 0 |
| chr19 | 4909509   | 4962165   | <b>UHRF1</b>     | + | 52656  | 1.627  | 2773  | 907   | 3395  | 0.267 | -1.903848 | 0.04  | 1 |
| chr1  | 17866329  | 18024370  | <b>ARHGEF10L</b> | + | 158041 | 1.033  | 5270  | 1726  | 6451  | 0.268 | -1.901784 | 0.056 | 1 |
| chr4  | 104026962 | 104119566 | <b>CENPE</b>     | + | 92604  | 1.251  | 3861  | 1265  | 4727  | 0.268 | -1.90071  | 0.054 | 1 |
| chr12 | 11802787  | 12048325  | <b>ETV6</b>      | + | 245538 | 1.993  | 16415 | 5388  | 20090 | 0.268 | -1.898484 | 0.155 | 0 |
| chr10 | 21823100  | 22032559  | <b>MLL10</b>     | + | 209459 | 1.967  | 13540 | 4445  | 16572 | 0.268 | -1.898382 | 0.125 | 0 |
| chr5  | 169010637 | 169031781 | <b>CCDC99</b>    | + | 21144  | 6.773  | 4855  | 1598  | 5941  | 0.269 | -1.89385  | 0.066 | 1 |
| chr16 | 64980682  | 65155919  | <b>CDH11</b>     | - | 175237 | 4.218  | 24707 | 8119  | 30236 | 0.269 | -1.896769 | 0.222 | 0 |
| chr10 | 101635333 | 101769676 | <b>DNMBP</b>     | - | 134343 | 3.249  | 14504 | 4768  | 17750 | 0.269 | -1.896158 | 0.137 | 0 |
| chr3  | 99357453  | 99515158  | <b>COL8A1</b>    | + | 157705 | 2.598  | 13962 | 4611  | 17079 | 0.27  | -1.888895 | 0.145 | 0 |
| chr6  | 26031816  | 26032288  | <b>HIST1H3B</b>  | - | 472    | 13.616 | 210   | 69    | 257   | 0.27  | -1.890335 | 0.112 | 0 |
| chr8  | 89049459  | 89339717  | <b>MYMP16</b>    | - | 290258 | 1.095  | 10694 | 3533  | 13081 | 0.27  | -1.888326 | 0.113 | 0 |
| chr17 | 12569206  | 12670651  | <b>MYOCD</b>     | + | 101445 | 1.422  | 5140  | 1695  | 6288  | 0.27  | -1.890838 | 0.085 | 1 |
| chr12 | 11148560  | 11150474  | <b>TAS2R20</b>   | - | 1914   | 1.325  | 85    | 28    | 104   | 0.27  | -1.890292 | 0.21  | 0 |
| chr4  | 185615218 | 185655286 | <b>MLF1IP</b>    | - | 40068  | 1.072  | 1406  | 466   | 1720  | 0.271 | -1.882418 | 0.04  | 1 |
| chr11 | 43702142  | 43878169  | <b>HSD17B12</b>  | + | 176027 | 1.022  | 5954  | 1982  | 7278  | 0.272 | -1.876641 | 0.07  | 1 |
| chr12 | 27677044  | 27848497  | <b>PPFIBP1</b>   | + | 171453 | 2.513  | 14568 | 4861  | 17804 | 0.273 | -1.872783 | 0.15  | 0 |
| chr1  | 19665266  | 19812066  | <b>CAPZB</b>     | - | 146800 | 4.287  | 20345 | 6799  | 24860 | 0.274 | -1.870314 | 0.177 | 0 |
| chr11 | 48002109  | 48192394  | <b>PTPRJ</b>     | + | 190285 | 1.292  | 8235  | 2757  | 10061 | 0.274 | -1.867489 | 0.094 | 1 |
| chr4  | 1723216   | 1746905   | <b>TACC3</b>     | + | 23689  | 1.915  | 1469  | 491   | 1795  | 0.274 | -1.869592 | 0.039 | 1 |
| chr15 | 85923870  | 86292586  | <b>AKAP13</b>    | + | 368716 | 3.104  | 38148 | 12807 | 46595 | 0.275 | -1.863271 | 0.332 | 0 |
| chr1  | 212208918 | 212278187 | <b>DTL</b>       | + | 69269  | 1.077  | 2454  | 825   | 2997  | 0.275 | -1.860991 | 0.047 | 1 |
| chr15 | 91509267  | 91537804  | <b>PRC1</b>      | - | 28537  | 2.241  | 2100  | 705   | 2565  | 0.275 | -1.861549 | 0.045 | 1 |
| chr3  | 15708743  | 15901053  | <b>ANKRD28</b>   | - | 192310 | 3.771  | 24250 | 8180  | 29607 | 0.276 | -1.856585 | 0.23  | 0 |
| chr13 | 98795433  | 99102023  | <b>FARP1</b>     | + | 306590 | 1.762  | 17947 | 6055  | 21911 | 0.276 | -1.855429 | 0.176 | 0 |
| chr6  | 7107829   | 7252213   | <b>RREB1</b>     | + | 144384 | 3.115  | 14668 | 4945  | 17909 | 0.276 | -1.856522 | 0.139 | 0 |
| chr9  | 107543283 | 107690527 | <b>ABCA1</b>     | - | 147244 | 1.298  | 6036  | 2039  | 7368  | 0.277 | -1.853078 | 0.061 | 1 |
| chr7  | 8008422   | 8128709   | <b>GLCC11</b>    | + | 120287 | 1.217  | 4848  | 1637  | 5918  | 0.277 | -1.853862 | 0.065 | 1 |
| chr3  | 65339905  | 66024509  | <b>MAG11</b>     | - | 684604 | 1.306  | 29967 | 10129 | 36580 | 0.277 | -1.852531 | 0.278 | 0 |
| chr12 | 1100403   | 1605099   | <b>ERC1</b>      | + | 504696 | 1.057  | 17873 | 6053  | 21814 | 0.278 | -1.849403 | 0.181 | 0 |
| chr6  | 108881025 | 109005971 | <b>FOXO3</b>     | + | 124946 | 1.926  | 7953  | 2694  | 9707  | 0.278 | -1.849277 | 0.092 | 1 |
| chr6  | 17759413  | 17987854  | <b>KIF13A</b>    | - | 228441 | 2.874  | 21937 | 7435  | 26772 | 0.278 | -1.848267 | 0.215 | 0 |

|       |           |           |                     |   |        |         |       |       |        |       |           |       |   |
|-------|-----------|-----------|---------------------|---|--------|---------|-------|-------|--------|-------|-----------|-------|---|
| chr9  | 134735498 | 134955253 | <b>MED27</b>        | - | 219755 | 1.242   | 8946  | 3034  | 10917  | 0.278 | -1.847147 | 0.097 | 1 |
| chr7  | 158424002 | 158497520 | <b>NCAPG2</b>       | - | 73518  | 1.427   | 3456  | 1173  | 4217   | 0.278 | -1.845776 | 0.056 | 1 |
| chr18 | 2571509   | 2616634   | <b>NDC80</b>        | + | 45125  | 1.262   | 1896  | 643   | 2314   | 0.278 | -1.846691 | 0.049 | 1 |
| chr3  | 136055998 | 136471245 | <b>STAG1</b>        | - | 415247 | 1.675   | 23358 | 7931  | 28500  | 0.278 | -1.845254 | 0.229 | 0 |
| chr17 | 76000317  | 76104916  | <b>TNRC6C</b>       | + | 104599 | 1.039   | 3602  | 1223  | 4396   | 0.278 | -1.845769 | 0.058 | 1 |
| chr10 | 320129    | 735608    | <b>DIP2C</b>        | - | 415479 | 1.69    | 22917 | 7810  | 27952  | 0.279 | -1.839416 | 0.212 | 0 |
| chr1  | 65730429  | 65881552  | <b>DNAJC6</b>       | + | 151123 | 1.358   | 6790  | 2310  | 8283   | 0.279 | -1.841926 | 0.083 | 1 |
| chr4  | 123747862 | 123819390 | <b>FGF2</b>         | + | 71528  | 11.959  | 28857 | 9807  | 35207  | 0.279 | -1.843888 | 0.277 | 0 |
| chr15 | 37183221  | 37393500  | <b>MEIS2</b>        | - | 210279 | 4.066   | 28407 | 9679  | 34649  | 0.279 | -1.839914 | 0.266 | 0 |
| chr6  | 20100934  | 20212670  | <b>MBOAT1</b>       | - | 111736 | 1.926   | 7403  | 2531  | 9027   | 0.28  | -1.834588 | 0.104 | 0 |
| chr22 | 18270415  | 185007325 | <b>ADCAL3</b>       | - | 236910 | 1.397   | 10732 | 3669  | 13087  | 0.28  | -1.834655 | 0.109 | 0 |
| chr4  | 119201192 | 119273922 | <b>PRSS12</b>       | - | 72730  | 2.341   | 5826  | 1989  | 7106   | 0.28  | -1.836395 | 0.088 | 1 |
| chr15 | 64791618  | 64978266  | <b>ZNF609</b>       | + | 186648 | 1.102   | 6889  | 2350  | 8402   | 0.28  | -1.83814  | 0.089 | 1 |
| chr7  | 132469622 | 132766828 | <b>CHCHD3</b>       | - | 297206 | 1.068   | 10416 | 3568  | 12699  | 0.281 | -1.831188 | 0.113 | 0 |
| chr2  | 234745485 | 234763212 | <b>HJURP</b>        | - | 17727  | 6.134   | 3523  | 1205  | 4295   | 0.281 | -1.833887 | 0.054 | 1 |
| chr10 | 129894924 | 129924468 | <b>MKI67</b>        | - | 29544  | 4.247   | 4133  | 1415  | 5039   | 0.281 | -1.832413 | 0.062 | 1 |
| chr3  | 81538849  | 81810950  | <b>GBE1</b>         | - | 272101 | 2.478   | 22553 | 7750  | 27487  | 0.282 | -1.826488 | 0.227 | 0 |
| chr2  | 227596032 | 227663506 | <b>IRS1</b>         | - | 67474  | 2.967   | 6642  | 2279  | 8096   | 0.282 | -1.828479 | 0.085 | 1 |
| chr5  | 156904311 | 157002783 | <b>ADAM19</b>       | - | 98472  | 2.661   | 8702  | 3002  | 10601  | 0.283 | -1.819941 | 0.105 | 0 |
| chr2  | 231577556 | 231685790 | <b>CAB39</b>        | + | 108234 | 5.487   | 19818 | 6840  | 24144  | 0.283 | -1.819426 | 0.206 | 0 |
| chr8  | 141668480 | 142011412 | <b>PTK2</b>         | - | 342932 | 2.263   | 25898 | 8929  | 31554  | 0.283 | -1.821202 | 0.255 | 0 |
| chr6  | 125304513 | 125404661 | <b>RNF217</b>       | + | 100148 | 1.605   | 5444  | 1886  | 6630   | 0.284 | -1.813714 | 0.084 | 1 |
| chr15 | 41624891  | 41673248  | <b>NUSAP1</b>       | + | 48357  | 1.367   | 2189  | 759   | 2666   | 0.285 | -1.812681 | 0.054 | 1 |
| chr3  | 64079525  | 64211131  | <b>PRICKLE2</b>     | - | 131606 | 1.519   | 6653  | 2306  | 8103   | 0.285 | -1.812866 | 0.089 | 1 |
| chr17 | 17584786  | 17714765  | <b>RAI1</b>         | + | 129979 | 2.003   | 8383  | 2905  | 10208  | 0.285 | -1.81279  | 0.092 | 1 |
| chr2  | 201170603 | 201346986 | <b>SPATS2L</b>      | + | 176383 | 3.059   | 18126 | 6294  | 22070  | 0.285 | -1.809911 | 0.196 | 0 |
| chr9  | 130267617 | 130341268 | <b>FAM129B</b>      | - | 73651  | 5.949   | 14090 | 4907  | 17151  | 0.286 | -1.805239 | 0.141 | 0 |
| chr6  | 26199786  | 26200216  | <b>HIST1H2BF</b>    | + | 430    | 1.254   | 17    | 6     | 20     | 0.286 | -1.805276 | 0.41  | 0 |
| chrX  | 21958714  | 22012955  | <b>SMS</b>          | + | 54241  | 2.883   | 5154  | 1791  | 6275   | 0.286 | -1.808403 | 0.073 | 1 |
| chr22 | 46067677  | 46241187  | <b>ATXN10</b>       | + | 173510 | 5.318   | 30550 | 10660 | 37180  | 0.287 | -1.802311 | 0.292 | 0 |
| chr20 | 30193085  | 30194317  | <b>ID1</b>          | + | 1232   | 150.342 | 5875  | 2053  | 7149   | 0.287 | -1.798888 | 0.07  | 1 |
| chr7  | 27870192  | 28220437  | <b>ZFAZ1</b>        | + | 350245 | 2.42    | 28421 | 9941  | 34581  | 0.287 | -1.79845  | 0.285 | 0 |
| chr16 | 86508130  | 86542466  | <b>LOC400550</b>    | - | 34336  | 2.213   | 2427  | 847   | 2954   | 0.287 | -1.801972 | 0.047 | 1 |
| chr5  | 142657495 | 142815077 | <b>NR3C1</b>        | - | 157582 | 3.675   | 19553 | 6827  | 23796  | 0.287 | -1.801353 | 0.216 | 0 |
| chr12 | 100967488 | 101018685 | <b>GASL2L3</b>      | + | 51197  | 1.745   | 2919  | 1021  | 3552   | 0.288 | -1.798123 | 0.056 | 1 |
| chr7  | 104622193 | 104631612 | <b>LOC100216546</b> | - | 9419   | 5.051   | 1572  | 550   | 1913   | 0.288 | -1.796845 | 0.054 | 1 |
| chr13 | 47127295  | 47327175  | <b>LRCH1</b>        | + | 199880 | 1.336   | 8852  | 3102  | 10768  | 0.288 | -1.795444 | 0.111 | 0 |
| chr11 | 9800213   | 10315754  | <b>SBF2</b>         | - | 515541 | 1.239   | 21430 | 7503  | 26072  | 0.288 | -1.796969 | 0.228 | 0 |
| chr4  | 146681887 | 146859607 | <b>ZNF827</b>       | - | 177720 | 1.497   | 8993  | 3146  | 10942  | 0.288 | -1.798314 | 0.121 | 0 |
| chr8  | 141541263 | 141645646 | <b>EIF2C2</b>       | - | 104383 | 1.651   | 5540  | 1954  | 6735   | 0.29  | -1.784893 | 0.073 | 1 |
| chr21 | 26955086  | 26955536  | <b>LINC00515</b>    | - | 450    | 1.524   | 21    | 7     | 26     | 0.29  | -1.787566 | 0.398 | 0 |
| chr5  | 34656432  | 34832717  | <b>RAI14</b>        | + | 176285 | 2.862   | 16678 | 5889  | 20275  | 0.29  | -1.783423 | 0.184 | 0 |
| chr1  | 230202955 | 230417875 | <b>GALNT2</b>       | + | 214920 | 1.679   | 11830 | 4179  | 14380  | 0.291 | -1.782735 | 0.137 | 0 |
| chr9  | 3824127   | 4300035   | <b>GLIS3</b>        | - | 475908 | 1.077   | 17279 | 6120  | 20998  | 0.291 | -1.778589 | 0.201 | 0 |
| chr13 | 110406183 | 110438914 | <b>IRS2</b>         | - | 32731  | 2.782   | 2929  | 1036  | 3560   | 0.291 | -1.781059 | 0.055 | 1 |
| chr13 | 76194569  | 76434006  | <b>LMO7</b>         | + | 239437 | 11.774  | 95688 | 33895 | 116285 | 0.291 | -1.778529 | 0.701 | 0 |
| chr8  | 134467090 | 134584183 | <b>ST3GAL1</b>      | - | 117093 | 1.901   | 7158  | 2535  | 8699   | 0.291 | -1.77877  | 0.088 | 1 |
| chr8  | 25316512  | 25365425  | <b>CDCA2</b>        | + | 48913  | 1.634   | 2637  | 936   | 3203   | 0.292 | -1.774298 | 0.061 | 1 |
| chr2  | 151324709 | 151344180 | <b>RND3</b>         | - | 19471  | 71.169  | 44572 | 15791 | 54165  | 0.292 | -1.778204 | 0.378 | 0 |
| chr4  | 114821439 | 114900878 | <b>ARSJ</b>         | - | 79439  | 3.329   | 8918  | 3172  | 10833  | 0.293 | -1.771741 | 0.126 | 0 |
| chr3  | 194123402 | 194188968 | <b>ATP13A3</b>      | - | 65566  | 3.235   | 6935  | 2465  | 8425   | 0.293 | -1.772634 | 0.094 | 1 |
| chr12 | 24962957  | 25102393  | <b>BCAT1</b>        | - | 139436 | 1.275   | 6001  | 2138  | 7289   | 0.293 | -1.769332 | 0.097 | 1 |
| chr2  | 163027199 | 163100045 | <b>FAP</b>          | - | 72846  | 2.675   | 6394  | 2276  | 7766   | 0.293 | -1.770642 | 0.091 | 1 |
| chr2  | 30454396  | 30482899  | <b>LBH</b>          | + | 28503  | 7.263   | 7079  | 2522  | 8598   | 0.293 | -1.769309 | 0.115 | 0 |
| chr4  | 17812524  | 17846487  | <b>NCAPG</b>        | + | 33963  | 2.475   | 2802  | 998   | 3403   | 0.293 | -1.769475 | 0.065 | 1 |
| chr10 | 855483    | 931702    | <b>LARP4B</b>       | - | 76219  | 2.554   | 6387  | 2278  | 7757   | 0.294 | -1.767252 | 0.092 | 1 |
| chr15 | 48700502  | 48937985  | <b>FBN1</b>         | - | 237483 | 5.224   | 42189 | 15122 | 51211  | 0.295 | -1.759756 | 0.408 | 0 |
| chr5  | 125695787 | 125829853 | <b>GRAMD3</b>       | + | 134066 | 5.988   | 27360 | 9803  | 33212  | 0.295 | -1.760363 | 0.303 | 0 |
| chr10 | 69869249  | 69971773  | <b>MYPN</b>         | + | 102524 | 1.844   | 6307  | 2260  | 7657   | 0.295 | -1.76047  | 0.097 | 1 |
| chr12 | 78225068  | 78606790  | <b>NAV3</b>         | + | 381722 | 3.423   | 44922 | 16082 | 54535  | 0.295 | -1.761707 | 0.435 | 0 |
| chr3  | 196769430 | 197025447 | <b>DLG1</b>         | - | 256017 | 2.182   | 18816 | 6762  | 22834  | 0.296 | -1.755572 | 0.223 | 0 |
| chr5  | 43014830  | 43018913  | <b>LOC648987</b>    | - | 4083   | 2.182   | 288   | 103   | 350    | 0.296 | -1.75649  | 0.117 | 0 |
| chr15 | 57210832  | 57580714  | <b>TCF12</b>        | + | 369882 | 2.273   | 28394 | 10197 | 34460  | 0.296 | -1.756786 | 0.306 | 0 |
| chr19 | 56124958  | 56129907  | <b>ZNF865</b>       | + | 4949   | 1.199   | 186   | 66    | 226    | 0.296 | -1.758157 | 0.135 | 0 |
| chr16 | 4382224   | 4389598   | <b>GLIS2</b>        | + | 7374   | 2.002   | 471   | 169   | 571    | 0.297 | -1.750852 | 0.081 | 1 |
| chr13 | 114747193 | 114898095 | <b>RASA3</b>        | - | 150902 | 1.994   | 9668  | 3483  | 11729  | 0.297 | -1.751413 | 0.116 | 0 |
| chr4  | 141786724 | 142054616 | <b>RNF150</b>       | - | 267892 | 1.911   | 17824 | 6422  | 21625  | 0.297 | -1.751543 | 0.237 | 0 |
| chr8  | 62413114  | 62627199  | <b>ASPH</b>         | - | 214085 | 7.997   | 57138 | 20658 | 69298  | 0.298 | -1.746104 | 0.498 | 0 |
| chr18 | 8717368   | 8832775   | <b>CCDC165</b>      | + | 115407 | 2.772   | 10426 | 3772  | 12644  | 0.298 | -1.744729 | 0.132 | 0 |
| chr17 | 16946073  | 17095962  | <b>MPRIIP</b>       | + | 149889 | 2.41    | 11738 | 4242  | 14236  | 0.298 | -1.746438 | 0.14  | 0 |
| chr2  | 65537984  | 65659656  | <b>SPRED2</b>       | - | 121672 | 1.618   | 6395  | 2313  | 7756   | 0.298 | -1.745587 | 0.092 | 1 |

|       |           |           |                     |   |        |        |       |       |       |       |           |       |   |
|-------|-----------|-----------|---------------------|---|--------|--------|-------|-------|-------|-------|-----------|-------|---|
| chr1  | 103342022 | 103574052 | <b>COL11A1</b>      | - | 232030 | 6.536  | 52456 | 19003 | 63607 | 0.299 | -1.742902 | 0.496 | 0 |
| chr2  | 27008881  | 27017455  | <b>CENPA</b>        | + | 8574   | 1.94   | 536   | 195   | 649   | 0.301 | -1.732408 | 0.082 | 1 |
| chr14 | 65877309  | 66210839  | <b>FUT8</b>         | + | 333530 | 1.423  | 15914 | 5809  | 19283 | 0.301 | -1.730944 | 0.202 | 0 |
| chr10 | 3109711   | 3178997   | <b>PFKP</b>         | + | 69286  | 1.35   | 3043  | 1111  | 3688  | 0.301 | -1.730302 | 0.066 | 1 |
| chr11 | 122526397 | 122685187 | <b>UBASH3B</b>      | + | 158790 | 1.402  | 7225  | 2636  | 8754  | 0.301 | -1.731447 | 0.101 | 0 |
| chr22 | 35796115  | 35820495  | <b>MCM5</b>         | + | 24380  | 1.161  | 917   | 335   | 1111  | 0.302 | -1.729133 | 0.064 | 1 |
| chr1  | 120454175 | 120612317 | <b>PTNCH2</b>       | - | 158142 | 1.72   | 9000  | 3295  | 10902 | 0.302 | -1.72621  | 0.13  | 0 |
| chr7  | 24836163  | 25019760  | <b>OSBPL3</b>       | - | 183597 | 3.381  | 20542 | 7519  | 24883 | 0.302 | -1.726493 | 0.237 | 0 |
| chr9  | 35490006  | 35561895  | <b>RUSC2</b>        | + | 71889  | 4.399  | 10622 | 3891  | 12865 | 0.302 | -1.725204 | 0.152 | 0 |
| chr3  | 57994126  | 58157982  | <b>FLNB</b>         | + | 163856 | 1.512  | 8170  | 2995  | 9896  | 0.303 | -1.724266 | 0.12  | 0 |
| chr3  | 171757417 | 172118492 | <b>FNDC3B</b>       | + | 361075 | 3.335  | 40236 | 14743 | 48734 | 0.303 | -1.72485  | 0.396 | 0 |
| chr2  | 189157389 | 189460652 | <b>GULP1</b>        | + | 303263 | 2.921  | 30394 | 11152 | 36808 | 0.303 | -1.722651 | 0.345 | 0 |
| chr2  | 135011829 | 135212192 | <b>MGAT5</b>        | + | 200363 | 1.24   | 8348  | 3062  | 10110 | 0.303 | -1.722869 | 0.132 | 0 |
| chr1  | 163291722 | 163325553 | <b>NUF2</b>         | + | 33831  | 1.707  | 1897  | 695   | 2298  | 0.303 | -1.724513 | 0.064 | 1 |
| chr1  | 214522038 | 214725024 | <b>PTPN14</b>       | - | 202986 | 3.253  | 22015 | 8086  | 26657 | 0.303 | -1.721013 | 0.257 | 0 |
| chr12 | 50382944  | 50419307  | <b>RACGAP1</b>      | - | 36363  | 1.724  | 2085  | 764   | 2525  | 0.303 | -1.724718 | 0.068 | 1 |
| chr3  | 114056946 | 114866127 | <b>ZBTB20</b>       | - | 809181 | 1.185  | 32198 | 11821 | 38991 | 0.303 | -1.721739 | 0.343 | 0 |
| chr6  | 151186814 | 151423023 | <b>MTHFD1L</b>      | + | 236209 | 2.342  | 18307 | 6733  | 22164 | 0.304 | -1.718799 | 0.22  | 0 |
| chr3  | 123331142 | 123603149 | <b>MYLK</b>         | - | 272007 | 7.017  | 61792 | 22749 | 74806 | 0.304 | -1.717345 | 0.515 | 0 |
| chr1  | 38158158  | 38175391  | <b>CDCA8</b>        | + | 17233  | 3.036  | 1709  | 630   | 2068  | 0.305 | -1.714274 | 0.063 | 1 |
| chr8  | 25276773  | 25282556  | <b>GNRH1</b>        | - | 5783   | 1.29   | 248   | 91    | 300   | 0.305 | -1.710754 | 0.151 | 0 |
| chr2  | 127413683 | 127454246 | <b>GYPC</b>         | + | 40563  | 1.57   | 2025  | 747   | 2451  | 0.305 | -1.714171 | 0.056 | 1 |
| chr3  | 124481794 | 124606144 | <b>ITGB5</b>        | - | 124350 | 1.266  | 5224  | 1928  | 6323  | 0.305 | -1.712955 | 0.096 | 1 |
| chr1  | 10535002  | 10690815  | <b>PEX14</b>        | + | 155813 | 1.371  | 7006  | 2583  | 8480  | 0.305 | -1.714893 | 0.108 | 0 |
| chr13 | 41506054  | 41593508  | <b>ELF1</b>         | - | 87454  | 1.88   | 5550  | 2056  | 6714  | 0.306 | -1.706982 | 0.108 | 0 |
| chr16 | 67973786  | 67977376  | <b>LCAT</b>         | - | 3590   | 2.127  | 242   | 90    | 293   | 0.306 | -1.706101 | 0.134 | 0 |
| chr2  | 20448452  | 20527144  | <b>PUM2</b>         | - | 78692  | 2.964  | 7788  | 2886  | 9423  | 0.306 | -1.707073 | 0.127 | 0 |
| chr9  | 134452156 | 134612925 | <b>RAPGEF1</b>      | - | 160769 | 1.309  | 6815  | 2524  | 8245  | 0.306 | -1.707797 | 0.101 | 0 |
| chr3  | 16357351  | 16555222  | <b>RFTN1</b>        | - | 197871 | 1.284  | 8393  | 3103  | 10156 | 0.306 | -1.710596 | 0.127 | 0 |
| chr8  | 100025493 | 100889808 | <b>VPS13B</b>       | + | 864315 | 1.011  | 29272 | 10828 | 35420 | 0.306 | -1.709789 | 0.326 | 0 |
| chr20 | 37554954  | 37581703  | <b>FAM83D</b>       | + | 26749  | 2.403  | 2091  | 778   | 2529  | 0.308 | -1.699414 | 0.065 | 1 |
| chr3  | 119540801 | 119813264 | <b>GSK3B</b>        | - | 272463 | 2.546  | 23099 | 8595  | 27934 | 0.308 | -1.70035  | 0.274 | 0 |
| chr10 | 64926987  | 65225722  | <b>JMJD1C</b>       | - | 298735 | 2.367  | 23758 | 8837  | 28731 | 0.308 | -1.700903 | 0.284 | 0 |
| chr14 | 92980124  | 93155334  | <b>RIN3</b>         | + | 175210 | 1.094  | 6232  | 2322  | 7535  | 0.308 | -1.6979   | 0.099 | 1 |
| chr17 | 1963132   | 2207069   | <b>SMG6</b>         | - | 243937 | 1.513  | 12086 | 4504  | 14613 | 0.308 | -1.697836 | 0.161 | 0 |
| chr8  | 12940871  | 13372429  | <b>DLC1</b>         | - | 431558 | 2.06   | 30245 | 11282 | 36567 | 0.309 | -1.696517 | 0.348 | 0 |
| chr6  | 33665345  | 33679504  | <b>C6orf125</b>     | - | 14159  | 1.069  | 491   | 184   | 594   | 0.31  | -1.688014 | 0.097 | 1 |
| chr19 | 10244021  | 10305755  | <b>DNMT1</b>        | - | 61734  | 2.143  | 4286  | 1606  | 5179  | 0.31  | -1.688897 | 0.083 | 1 |
| chr2  | 197063976 | 197457335 | <b>HECW2</b>        | - | 393359 | 1.486  | 19353 | 7250  | 23388 | 0.31  | -1.689707 | 0.24  | 0 |
| chr5  | 149887673 | 149937773 | <b>NDST1</b>        | + | 50100  | 3.165  | 5168  | 1934  | 6246  | 0.31  | -1.690751 | 0.093 | 1 |
| chr14 | 24641233  | 24649463  | <b>REC8</b>         | + | 8230   | 1.033  | 268   | 100   | 324   | 0.31  | -1.691271 | 0.126 | 0 |
| chr15 | 32907690  | 32931868  | <b>ARHGAP11A</b>    | + | 24178  | 1.447  | 1163  | 436   | 1405  | 0.311 | -1.686618 | 0.074 | 1 |
| chr11 | 122943032 | 123066007 | <b>CLMP</b>         | - | 122975 | 2.635  | 10548 | 3968  | 12742 | 0.311 | -1.682939 | 0.147 | 0 |
| chr21 | 38739858  | 38887679  | <b>DYRK1A</b>       | + | 147821 | 5.173  | 25488 | 9585  | 30789 | 0.311 | -1.683493 | 0.301 | 0 |
| chr19 | 18553472  | 18632937  | <b>ELL</b>          | - | 79465  | 2.541  | 6460  | 2424  | 7806  | 0.311 | -1.686819 | 0.098 | 1 |
| chr5  | 130977406 | 131132756 | <b>FNIP1</b>        | - | 155350 | 3.425  | 17179 | 6452  | 20755 | 0.311 | -1.685583 | 0.205 | 0 |
| chr16 | 2479394   | 2508859   | <b>CCNF</b>         | + | 29465  | 1.406  | 1331  | 501   | 1607  | 0.312 | -1.68021  | 0.064 | 1 |
| chr6  | 27100816  | 27101314  | <b>HIST1H2AG</b>    | + | 498    | 3.42   | 56    | 21    | 68    | 0.312 | -1.679092 | 0.327 | 0 |
| chr12 | 58120022  | 58122139  | <b>LOC100130776</b> | + | 2117   | 1.489  | 100   | 37    | 120   | 0.312 | -1.679432 | 0.219 | 0 |
| chr3  | 30647993  | 30735633  | <b>TGFBR2</b>       | + | 87640  | 3.259  | 9466  | 3567  | 11433 | 0.312 | -1.680382 | 0.146 | 0 |
| chr6  | 4706392   | 4955778   | <b>CDYL</b>         | + | 249386 | 1.036  | 8523  | 3219  | 10291 | 0.313 | -1.676483 | 0.137 | 0 |
| chr7  | 2767740   | 2883959   | <b>GNA12</b>        | - | 116219 | 1.575  | 5966  | 2253  | 7203  | 0.313 | -1.676785 | 0.103 | 0 |
| chr1  | 41492870  | 41707815  | <b>SCMH1</b>        | - | 214945 | 1.106  | 7919  | 2996  | 9560  | 0.313 | -1.673642 | 0.136 | 0 |
| chr7  | 55538305  | 55640200  | <b>VOPP1</b>        | - | 101895 | 1.634  | 5439  | 2056  | 6567  | 0.313 | -1.674976 | 0.099 | 1 |
| chr11 | 35160416  | 35253949  | <b>CD44</b>         | + | 93533  | 23.323 | 72126 | 27372 | 87044 | 0.314 | -1.669035 | 0.606 | 0 |
| chr2  | 15307031  | 15701454  | <b>NBAS</b>         | - | 394423 | 1.016  | 13298 | 5045  | 16049 | 0.314 | -1.66938  | 0.19  | 0 |
| chr15 | 66994673  | 67074337  | <b>SMAD6</b>        | + | 79664  | 2.462  | 6503  | 2464  | 7849  | 0.314 | -1.671021 | 0.12  | 0 |
| chr6  | 80714321  | 80752244  | <b>TTK</b>          | + | 37923  | 1.445  | 1814  | 687   | 2190  | 0.314 | -1.671101 | 0.075 | 1 |
| chr17 | 1958392   | 1962981   | <b>HIC1</b>         | + | 4589   | 3.687  | 528   | 200   | 637   | 0.315 | -1.668091 | 0.083 | 1 |
| chr4  | 185308875 | 185395726 | <b>IRF2</b>         | - | 86851  | 1.026  | 2925  | 1112  | 3529  | 0.315 | -1.665908 | 0.08  | 1 |
| chr12 | 60083125  | 60175408  | <b>SLC16A7</b>      | + | 92283  | 1.349  | 4198  | 1594  | 5066  | 0.315 | -1.668073 | 0.102 | 0 |
| chr8  | 23386362  | 23430063  | <b>SLC25A37</b>     | + | 43701  | 1.388  | 1954  | 741   | 2358  | 0.315 | -1.668774 | 0.066 | 1 |
| chr10 | 31608100  | 31818742  | <b>ZEB1</b>         | + | 210642 | 2.237  | 15726 | 5980  | 18974 | 0.315 | -1.665699 | 0.219 | 0 |
| chr1  | 20915443  | 20945400  | <b>CDA</b>          | + | 29957  | 1.303  | 1287  | 490   | 1552  | 0.316 | -1.66235  | 0.075 | 1 |
| chr4  | 159690181 | 159827954 | <b>FNIP2</b>        | + | 137773 | 2.013  | 9050  | 3447  | 10918 | 0.316 | -1.663336 | 0.139 | 0 |
| chr4  | 142949181 | 143767604 | <b>INPP4B</b>       | - | 818423 | 2.388  | 63777 | 24277 | 76944 | 0.316 | -1.664177 | 0.552 | 0 |
| chr5  | 176732500 | 176739292 | <b>MXD3</b>         | - | 6792   | 1.431  | 312   | 119   | 376   | 0.316 | -1.660004 | 0.132 | 0 |
| chr15 | 40092930  | 40213093  | <b>GPR176</b>       | - | 120163 | 4.993  | 20109 | 7693  | 24247 | 0.317 | -1.656146 | 0.268 | 0 |
| chr19 | 46386865  | 46389376  | <b>IRF2BP1</b>      | - | 2511   | 1.415  | 112   | 42    | 135   | 0.317 | -1.65532  | 0.21  | 0 |
| chr1  | 119425665 | 119532179 | <b>TBX15</b>        | - | 106514 | 1.477  | 5205  | 1991  | 6276  | 0.317 | -1.656004 | 0.107 | 0 |
| chr10 | 114710008 | 114927436 | <b>TCF7L2</b>       | + | 217428 | 1.228  | 8774  | 3356  | 10580 | 0.317 | -1.656188 | 0.141 | 0 |

|       |           |           |                 |   |        |        |       |       |       |       |           |       |   |
|-------|-----------|-----------|-----------------|---|--------|--------|-------|-------|-------|-------|-----------|-------|---|
| chr16 | 28109315  | 28223190  | <b>XPO6</b>     | - | 113875 | 3.47   | 12903 | 4936  | 15558 | 0.317 | -1.656317 | 0.18  | 0 |
| chr2  | 122095351 | 122407052 | <b>CLASP1</b>   | - | 311701 | 1.923  | 19873 | 7611  | 23961 | 0.318 | -1.654534 | 0.258 | 0 |
| chr1  | 197473878 | 197744623 | <b>DENND1B</b>  | - | 270745 | 1.262  | 11584 | 4436  | 13967 | 0.318 | -1.654434 | 0.19  | 0 |
| chr11 | 72547789  | 72853143  | <b>FCHSD2</b>   | - | 305354 | 1.965  | 20310 | 7775  | 24488 | 0.318 | -1.655036 | 0.277 | 0 |
| chr11 | 58294343  | 58345639  | <b>LPXN</b>     | - | 51296  | 4.355  | 7311  | 2806  | 8813  | 0.318 | -1.650985 | 0.127 | 0 |
| chr2  | 238536223 | 238690290 | <b>LRRFIP1</b>  | + | 154067 | 2.661  | 13356 | 5131  | 16097 | 0.319 | -1.64938  | 0.187 | 0 |
| chr17 | 60556385  | 60692841  | <b>TLK2</b>     | + | 136456 | 1.479  | 6751  | 2592  | 8137  | 0.319 | -1.650037 | 0.133 | 0 |
| chr6  | 52362199  | 52441862  | <b>TRAM2</b>    | - | 79663  | 7.598  | 19899 | 7649  | 23982 | 0.319 | -1.648477 | 0.255 | 0 |
| chr21 | 44263203  | 44299678  | <b>WDR4</b>     | - | 36475  | 1.433  | 1668  | 641   | 2010  | 0.319 | -1.647792 | 0.066 | 1 |
| chr1  | 164528596 | 164821060 | <b>PBX1</b>     | + | 292464 | 1.037  | 9983  | 3851  | 12027 | 0.32  | -1.643076 | 0.158 | 0 |
| chr6  | 37787306  | 38122399  | <b>ZFAND3</b>   | + | 335093 | 2.852  | 31875 | 12301 | 38399 | 0.32  | -1.642212 | 0.366 | 0 |
| chr17 | 35441926  | 35766902  | <b>ACACA</b>    | - | 324976 | 1.095  | 11554 | 4471  | 13915 | 0.321 | -1.637738 | 0.169 | 0 |
| chr22 | 42334740  | 42343148  | <b>CENPM</b>    | - | 8408   | 2.532  | 680   | 263   | 819   | 0.321 | -1.63743  | 0.086 | 1 |
| chr2  | 218664511 | 218808796 | <b>TNS1</b>     | - | 144285 | 1.856  | 8856  | 3426  | 10666 | 0.321 | -1.638234 | 0.151 | 0 |
| chr2  | 235401685 | 235405693 | <b>ARL4C</b>    | - | 4008   | 1.517  | 194   | 75    | 234   | 0.322 | -1.635053 | 0.173 | 0 |
| chr15 | 36871811  | 37102449  | <b>C15orf41</b> | + | 230638 | 1.016  | 7786  | 3028  | 9372  | 0.323 | -1.629811 | 0.144 | 0 |
| chr2  | 113495443 | 113522254 | <b>CKAP2L</b>   | - | 26811  | 1.883  | 1670  | 649   | 2010  | 0.323 | -1.63078  | 0.083 | 1 |
| chr6  | 485137    | 693109    | <b>EXOC2</b>    | - | 207972 | 1.011  | 6930  | 2692  | 8342  | 0.323 | -1.631678 | 0.133 | 0 |
| chr2  | 192110106 | 192290115 | <b>MYO1B</b>    | + | 180009 | 5.31   | 32693 | 12726 | 39349 | 0.323 | -1.62852  | 0.398 | 0 |
| chr5  | 119800018 | 120022964 | <b>PRR16</b>    | + | 222946 | 2.658  | 19688 | 7651  | 23700 | 0.323 | -1.63114  | 0.268 | 0 |
| chr10 | 35535952  | 35860847  | <b>CCNY</b>     | + | 324895 | 1.079  | 11509 | 4493  | 13848 | 0.324 | -1.623859 | 0.18  | 0 |
| chr5  | 102594441 | 102614361 | <b>C5orf30</b>  | + | 19920  | 14.966 | 10179 | 3976  | 12246 | 0.325 | -1.622928 | 0.191 | 0 |
| chr4  | 186131283 | 186285120 | <b>SNX25</b>    | + | 153837 | 1.3    | 6793  | 2657  | 8171  | 0.325 | -1.620328 | 0.148 | 0 |
| chr11 | 121959810 | 122073770 | <b>MIR100HG</b> | - | 113960 | 5.694  | 21249 | 8330  | 25556 | 0.326 | -1.617165 | 0.277 | 0 |
| chr11 | 46417963  | 46612914  | <b>AMBRA1</b>   | - | 194951 | 1.307  | 8412  | 3311  | 10112 | 0.327 | -1.610525 | 0.153 | 0 |
| chr8  | 80831094  | 80942506  | <b>MURPS28</b>  | - | 111412 | 1.107  | 4120  | 1621  | 4953  | 0.327 | -1.611145 | 0.112 | 0 |
| chr12 | 106457124 | 106533811 | <b>NUAK1</b>    | - | 76687  | 2.556  | 6795  | 2675  | 8168  | 0.327 | -1.610508 | 0.164 | 0 |
| chr9  | 134305476 | 134375575 | <b>PRRC2B</b>   | + | 70099  | 2.421  | 5543  | 2177  | 6665  | 0.327 | -1.614032 | 0.116 | 0 |
| chr5  | 86564069  | 86687743  | <b>RASA1</b>    | + | 123674 | 3.303  | 13604 | 5354  | 16354 | 0.327 | -1.610826 | 0.217 | 0 |
| chr5  | 39371775  | 39425335  | <b>DAB2</b>     | - | 53560  | 19.306 | 35049 | 13805 | 42130 | 0.328 | -1.609631 | 0.417 | 0 |
| chr3  | 154797435 | 154901518 | <b>MME</b>      | + | 104083 | 1.766  | 5865  | 2309  | 7050  | 0.328 | -1.609945 | 0.109 | 0 |
| chr3  | 179370932 | 179507189 | <b>USP13</b>    | + | 136257 | 1.297  | 5848  | 2306  | 7029  | 0.328 | -1.607894 | 0.129 | 0 |
| chr18 | 74069636  | 74207146  | <b>ZNF516</b>   | - | 137510 | 2.108  | 9430  | 3714  | 11335 | 0.328 | -1.609549 | 0.156 | 0 |
| chr15 | 93443550  | 93571237  | <b>CHD2</b>     | + | 127687 | 5.757  | 24420 | 9650  | 29343 | 0.329 | -1.604333 | 0.321 | 0 |
| chr3  | 73431651  | 73674072  | <b>PDZR3</b>    | - | 242421 | 1.664  | 13503 | 5339  | 16224 | 0.329 | -1.603233 | 0.222 | 0 |
| chr1  | 156182778 | 156209868 | <b>PMF1</b>     | + | 27090  | 10.707 | 8851  | 3501  | 10634 | 0.329 | -1.602509 | 0.121 | 0 |
| chr1  | 44173217  | 44396831  | <b>ST3GAL3</b>  | + | 223614 | 1.148  | 8439  | 3332  | 10141 | 0.329 | -1.605446 | 0.153 | 0 |
| chr10 | 69681655  | 69835103  | <b>HERC4</b>    | - | 153448 | 9.084  | 45668 | 18085 | 54862 | 0.33  | -1.601004 | 0.468 | 0 |
| chr4  | 41362803  | 41702061  | <b>LIMCH1</b>   | + | 339258 | 1.484  | 17375 | 6890  | 20870 | 0.33  | -1.598732 | 0.285 | 0 |
| chr19 | 13106583  | 13209610  | <b>NFIX</b>     | + | 103027 | 2.012  | 6657  | 2639  | 7997  | 0.33  | -1.599511 | 0.124 | 0 |
| chr12 | 45609769  | 45834187  | <b>ANO6</b>     | + | 224418 | 2.366  | 17736 | 7046  | 21299 | 0.331 | -1.595792 | 0.266 | 0 |
| chr6  | 101846860 | 102517958 | <b>GRIK2</b>    | + | 671098 | 2.156  | 49924 | 19836 | 59953 | 0.331 | -1.595679 | 0.539 | 0 |
| chr4  | 83550689  | 83720010  | <b>SCD5</b>     | - | 169321 | 1.085  | 6168  | 2448  | 7408  | 0.331 | -1.59716  | 0.141 | 0 |
| chr1  | 2160133   | 2241652   | <b>SKI</b>      | + | 81519  | 2.568  | 6691  | 2661  | 8035  | 0.331 | -1.594151 | 0.124 | 0 |
| chr5  | 65222383  | 65376850  | <b>ERBB2IP</b>  | + | 154467 | 5.536  | 28650 | 11418 | 34394 | 0.332 | -1.590795 | 0.366 | 0 |
| chr22 | 24666785  | 24813708  | <b>SPECC1L</b>  | + | 146923 | 1.622  | 7877  | 3138  | 9456  | 0.332 | -1.591376 | 0.154 | 0 |
| chr9  | 21454266  | 21559697  | <b>MIR31HG</b>  | - | 105431 | 2.267  | 7862  | 3143  | 9435  | 0.333 | -1.585825 | 0.153 | 0 |
| chr3  | 160117429 | 160152741 | <b>SMC4</b>     | + | 35312  | 6.257  | 7327  | 2930  | 8793  | 0.333 | -1.585175 | 0.151 | 0 |
| chrY  | 14813159  | 14972768  | <b>USP9Y</b>    | + | 159609 | 1.567  | 8316  | 3322  | 9980  | 0.333 | -1.58681  | 0.164 | 0 |
| chr5  | 109025155 | 109203429 | <b>MAN2A1</b>   | + | 178274 | 1.198  | 7069  | 2833  | 8481  | 0.334 | -1.581579 | 0.148 | 0 |
| chr4  | 101944586 | 102268628 | <b>P3PCA</b>    | - | 324042 | 1.511  | 16429 | 6582  | 19712 | 0.334 | -1.582328 | 0.261 | 0 |
| chr2  | 46926098  | 46989927  | <b>SOCS5</b>    | + | 63829  | 14.476 | 30760 | 12337 | 36901 | 0.334 | -1.580591 | 0.38  | 0 |
| chr7  | 116164838 | 116201239 | <b>CAV1</b>     | + | 36401  | 23.359 | 28804 | 11577 | 34547 | 0.335 | -1.577312 | 0.38  | 0 |
| chr11 | 28129797  | 28355054  | <b>METTL15</b>  | + | 225257 | 1.131  | 8573  | 3441  | 10283 | 0.335 | -1.579473 | 0.178 | 0 |
| chr16 | 89334034  | 89556969  | <b>ANKRD11</b>  | - | 222935 | 2.899  | 20966 | 8437  | 25143 | 0.336 | -1.575343 | 0.282 | 0 |
| chr4  | 17844838  | 18023483  | <b>LCORL</b>    | - | 178645 | 1.431  | 8442  | 3410  | 10120 | 0.337 | -1.569334 | 0.168 | 0 |
| chr1  | 180257351 | 180472022 | <b>ACBD6</b>    | - | 214671 | 1.386  | 9851  | 3989  | 11805 | 0.338 | -1.565036 | 0.188 | 0 |
| chr12 | 15773074  | 15942510  | <b>EPS8</b>     | - | 169436 | 2.937  | 16778 | 6794  | 20106 | 0.338 | -1.565227 | 0.277 | 0 |
| chr5  | 153570294 | 153800543 | <b>GALNT10</b>  | + | 230249 | 1.285  | 9935  | 4025  | 11905 | 0.338 | -1.564514 | 0.198 | 0 |
| chr6  | 3722835   | 3752246   | <b>PXDC1</b>    | - | 29411  | 7.132  | 6951  | 2815  | 8329  | 0.338 | -1.564753 | 0.153 | 0 |
| chr9  | 116638561 | 116818875 | <b>ZNF618</b>   | + | 180314 | 1.584  | 9338  | 3779  | 11191 | 0.338 | -1.566015 | 0.174 | 0 |
| chrX  | 122318095 | 122624766 | <b>GRIA3</b>    | + | 306671 | 1.254  | 12749 | 5177  | 15273 | 0.339 | -1.560823 | 0.223 | 0 |
| chr6  | 143072603 | 143266338 | <b>HIVEP2</b>   | - | 193735 | 1.468  | 9428  | 3833  | 11293 | 0.339 | -1.558658 | 0.187 | 0 |
| chr2  | 161128661 | 161350318 | <b>RBMS1</b>    | - | 221657 | 4.733  | 35340 | 14335 | 42341 | 0.339 | -1.562503 | 0.434 | 0 |
| chr5  | 76986994  | 77072185  | <b>TBCA</b>     | - | 85191  | 2.173  | 6055  | 2458  | 7254  | 0.339 | -1.56079  | 0.137 | 0 |
| chr3  | 176738541 | 176915048 | <b>TBL1XR1</b>  | - | 176507 | 2.487  | 14656 | 5946  | 17559 | 0.339 | -1.562165 | 0.247 | 0 |
| chr7  | 7222245   | 7288251   | <b>C1GALT1</b>  | + | 66006  | 1.094  | 2355  | 958   | 2821  | 0.34  | -1.558465 | 0.097 | 1 |
| chr16 | 53737874  | 54148379  | <b>FTO</b>      | + | 410505 | 1.03   | 13989 | 5689  | 16756 | 0.34  | -1.55825  | 0.235 | 0 |
| chr22 | 43265771  | 43411184  | <b>PACSIN2</b>  | - | 145413 | 1.455  | 6920  | 2826  | 8284  | 0.341 | -1.55165  | 0.149 | 0 |
| chr13 | 30338544  | 30424820  | <b>UBL3</b>     | - | 86276  | 2.949  | 8525  | 3481  | 10206 | 0.341 | -1.551729 | 0.185 | 0 |
| chr17 | 8108048   | 8113883   | <b>AURKB</b>    | - | 5835   | 4.943  | 929   | 380   | 1112  | 0.342 | -1.546214 | 0.097 | 1 |

|       |           |           |                  |   |        |        |       |       |       |       |           |       |   |
|-------|-----------|-----------|------------------|---|--------|--------|-------|-------|-------|-------|-----------|-------|---|
| chr20 | 30252260  | 30310656  | <b>BCL2L1</b>    | - | 58396  | 5.664  | 10683 | 4378  | 12784 | 0.342 | -1.54594  | 0.188 | 0 |
| chr7  | 41728600  | 41742706  | <b>INHBA</b>     | - | 14106  | 2.564  | 1220  | 499   | 1460  | 0.342 | -1.549146 | 0.113 | 0 |
| chr17 | 43003447  | 43025082  | <b>KIF18B</b>    | - | 21635  | 2.138  | 1511  | 618   | 1809  | 0.342 | -1.549001 | 0.096 | 1 |
| chr5  | 77298149  | 77590528  | <b>AP3B1</b>     | - | 292379 | 1.489  | 14593 | 5994  | 17459 | 0.343 | -1.54232  | 0.258 | 0 |
| chr2  | 202671197 | 202758263 | <b>CDK15</b>     | + | 87066  | 1.904  | 5489  | 2253  | 6567  | 0.343 | -1.543474 | 0.142 | 0 |
| chr14 | 75745480  | 75748937  | <b>FOS</b>       | + | 3457   | 55.672 | 6055  | 2488  | 7244  | 0.343 | -1.541782 | 0.122 | 0 |
| chr10 | 26727265  | 26856732  | <b>APBB1IP</b>   | + | 129467 | 2.321  | 9993  | 4111  | 11953 | 0.344 | -1.539614 | 0.202 | 0 |
| chr7  | 151832009 | 152133090 | <b>MLL3</b>      | - | 301081 | 1.27   | 12729 | 5237  | 15227 | 0.344 | -1.539865 | 0.232 | 0 |
| chr16 | 2570362   | 2580955   | <b>AMDHD2</b>    | + | 10593  | 2.659  | 886   | 365   | 1060  | 0.345 | -1.536722 | 0.092 | 1 |
| chr6  | 20402136  | 20493945  | <b>E2F3</b>      | + | 91809  | 2.712  | 8153  | 3367  | 9748  | 0.345 | -1.533614 | 0.171 | 0 |
| chr18 | 59482303  | 59560304  | <b>RNF152</b>    | - | 78001  | 1.493  | 3885  | 1604  | 4645  | 0.345 | -1.533515 | 0.133 | 0 |
| chr11 | 17373308  | 17398868  | <b>B7H6</b>      | + | 25560  | 1.326  | 1060  | 438   | 1268  | 0.346 | -1.533122 | 0.085 | 1 |
| chr2  | 160175489 | 160473059 | <b>BAZZB</b>     | - | 297570 | 1.089  | 10914 | 4513  | 13048 | 0.346 | -1.531668 | 0.225 | 0 |
| chr12 | 6309481   | 6347437   | <b>CD9</b>       | + | 37956  | 1.641  | 1990  | 822   | 2379  | 0.346 | -1.532806 | 0.092 | 1 |
| chr22 | 23412668  | 23467221  | <b>GNAZ</b>      | + | 54553  | 1.02   | 1793  | 741   | 2144  | 0.346 | -1.533227 | 0.094 | 1 |
| chr22 | 29999544  | 30094589  | <b>NF2</b>       | + | 95045  | 1.679  | 5267  | 2177  | 6296  | 0.346 | -1.53185  | 0.141 | 0 |
| chr5  | 171469073 | 171615346 | <b>STK10</b>     | - | 146273 | 1.522  | 7214  | 2981  | 8625  | 0.346 | -1.53266  | 0.153 | 0 |
| chr9  | 140513443 | 140730578 | <b>EHMT1</b>     | + | 217135 | 1.399  | 9837  | 4079  | 11756 | 0.347 | -1.527137 | 0.187 | 0 |
| chr1  | 198126107 | 198291548 | <b>NEK7</b>      | + | 165441 | 6.432  | 36419 | 15114 | 43521 | 0.347 | -1.525812 | 0.47  | 0 |
| chr1  | 178694299 | 178889237 | <b>RALGPS2</b>   | + | 194938 | 2.177  | 14208 | 5891  | 16981 | 0.347 | -1.52723  | 0.259 | 0 |
| chr19 | 45596430  | 45650543  | <b>PPP1R37</b>   | + | 54113  | 1.555  | 2674  | 1112  | 3195  | 0.348 | -1.522158 | 0.096 | 1 |
| chr1  | 203595914 | 203713209 | <b>ATP2B4</b>    | + | 117295 | 7.173  | 27659 | 11536 | 33033 | 0.349 | -1.517699 | 0.374 | 0 |
| chr1  | 235824344 | 236030220 | <b>LYST</b>      | - | 205876 | 1.256  | 8320  | 3465  | 9939  | 0.349 | -1.520288 | 0.166 | 0 |
| chr10 | 27443752  | 27475848  | <b>MASTL</b>     | + | 32096  | 1.062  | 1119  | 466   | 1336  | 0.349 | -1.518383 | 0.108 | 0 |
| chrX  | 64887510  | 64961793  | <b>MSN</b>       | + | 74283  | 4.915  | 11953 | 4984  | 14277 | 0.349 | -1.518313 | 0.221 | 0 |
| chr8  | 27667137  | 27695349  | <b>PBK</b>       | - | 28212  | 1.628  | 1510  | 629   | 1803  | 0.349 | -1.518479 | 0.106 | 0 |
| chr16 | 3022791   | 3030540   | <b>KMVTY1</b>    | - | 7749   | 1.905  | 469   | 195   | 560   | 0.349 | -1.520126 | 0.135 | 0 |
| chr7  | 84624871  | 84751247  | <b>SEMA3D</b>    | - | 126376 | 1.757  | 7462  | 3112  | 8912  | 0.349 | -1.517682 | 0.186 | 0 |
| chr1  | 249104650 | 249120154 | <b>SH3BP5L</b>   | - | 15504  | 3.408  | 1705  | 711   | 2037  | 0.349 | -1.51871  | 0.097 | 1 |
| chr18 | 43427573  | 43547305  | <b>EPG5</b>      | - | 119732 | 2.715  | 10680 | 4459  | 12753 | 0.35  | -1.515796 | 0.21  | 0 |
| chr1  | 53971905  | 54199877  | <b>GLIS1</b>     | - | 227972 | 1.558  | 11506 | 4809  | 13739 | 0.35  | -1.514506 | 0.21  | 0 |
| chr3  | 149235021 | 149421060 | <b>WVTR1</b>     | - | 186039 | 1.441  | 8697  | 3631  | 10386 | 0.35  | -1.516107 | 0.178 | 0 |
| chr13 | 49550047  | 49783915  | <b>FNDC3A</b>    | + | 233868 | 2.496  | 19621 | 8212  | 23424 | 0.351 | -1.512132 | 0.326 | 0 |
| chr13 | 21547175  | 21635722  | <b>LATS2</b>     | - | 88547  | 3.602  | 10440 | 4369  | 12464 | 0.351 | -1.512412 | 0.206 | 0 |
| chr2  | 114737145 | 114764887 | <b>LOC440900</b> | + | 27742  | 1.697  | 1529  | 640   | 1826  | 0.351 | -1.511089 | 0.101 | 0 |
| chr22 | 20861885  | 20941919  | <b>MED15</b>     | + | 80034  | 4.637  | 12030 | 5040  | 14359 | 0.351 | -1.510374 | 0.218 | 0 |
| chr6  | 147525493 | 147711612 | <b>STXBP5</b>    | + | 186119 | 2.133  | 13342 | 5595  | 15924 | 0.351 | -1.508873 | 0.26  | 0 |
| chr11 | 118766850 | 118781613 | <b>BCL9L</b>     | - | 14763  | 5.066  | 2395  | 1005  | 2859  | 0.352 | -1.508106 | 0.1   | 1 |
| chr3  | 135684514 | 135866752 | <b>PPP2R3A</b>   | + | 182238 | 1.953  | 12002 | 5043  | 14322 | 0.352 | -1.505872 | 0.248 | 0 |
| chr15 | 56119121  | 56285835  | <b>NEDD4</b>     | - | 166714 | 1.29   | 7228  | 3047  | 8622  | 0.353 | -1.500496 | 0.189 | 0 |
| chr11 | 35684352  | 35830930  | <b>TRIM44</b>    | + | 146578 | 1.293  | 6267  | 2642  | 7475  | 0.353 | -1.500246 | 0.166 | 0 |
| chr4  | 184020462 | 184241929 | <b>WWC2</b>      | + | 221467 | 2.321  | 17286 | 7286  | 20619 | 0.353 | -1.500608 | 0.308 | 0 |
| chr3  | 185361526 | 185542827 | <b>IGF2BP2</b>   | - | 181301 | 2.554  | 15358 | 6484  | 18317 | 0.354 | -1.498203 | 0.277 | 0 |
| chr4  | 77356252  | 77704405  | <b>SHROOM3</b>   | + | 348153 | 1.263  | 14660 | 6183  | 17486 | 0.354 | -1.499646 | 0.274 | 0 |
| chr6  | 158244293 | 158366109 | <b>SNX9</b>      | + | 121816 | 3.377  | 13341 | 5633  | 15911 | 0.354 | -1.498008 | 0.237 | 0 |
| chr3  | 112323408 | 112359977 | <b>CCDC80</b>    | + | 36569  | 3.988  | 5075  | 2148  | 6051  | 0.355 | -1.493958 | 0.188 | 0 |
| chr2  | 62900985  | 63273621  | <b>EHBP1</b>     | - | 372636 | 2.179  | 27970 | 11848 | 33344 | 0.355 | -1.492773 | 0.427 | 0 |
| chr9  | 132427919 | 132484951 | <b>PRRX2</b>     | + | 57032  | 1.952  | 3665  | 1549  | 4370  | 0.355 | -1.495597 | 0.134 | 0 |
| chr1  | 154947117 | 154951725 | <b>CKS1B</b>     | + | 4608   | 1.662  | 252   | 107   | 300   | 0.356 | -1.488547 | 0.22  | 0 |
| chr15 | 64457715  | 64648442  | <b>CSNK1G1</b>   | - | 190727 | 1.106  | 6984  | 2960  | 8325  | 0.356 | -1.491526 | 0.18  | 0 |
| chr13 | 39917028  | 40177356  | <b>LHFP</b>      | - | 260328 | 1.747  | 15116 | 6406  | 18019 | 0.356 | -1.491888 | 0.278 | 0 |
| chr6  | 163835674 | 163999628 | <b>QKI</b>       | + | 163954 | 2.779  | 15272 | 6475  | 18204 | 0.356 | -1.491252 | 0.286 | 0 |
| chr19 | 39138266  | 39221171  | <b>ACTN4</b>     | + | 82905  | 9.648  | 26185 | 11147 | 31197 | 0.357 | -1.484738 | 0.373 | 0 |
| chr2  | 85980908  | 86018506  | <b>ATOH8</b>     | + | 37598  | 3.457  | 4247  | 1808  | 5060  | 0.357 | -1.484293 | 0.138 | 0 |
| chr2  | 54683453  | 54898583  | <b>SPTBN1</b>    | + | 215130 | 2.415  | 17089 | 7278  | 20359 | 0.357 | -1.484044 | 0.295 | 0 |
| chr8  | 99466860  | 99837909  | <b>STK3</b>      | - | 371049 | 1.068  | 13223 | 5617  | 15758 | 0.357 | -1.488013 | 0.263 | 0 |
| chr3  | 11314009  | 11599139  | <b>ATG7</b>      | + | 285130 | 1.175  | 11004 | 4687  | 13110 | 0.358 | -1.483943 | 0.226 | 0 |
| chr19 | 1275519   | 1279243   | <b>C19orf24</b>  | + | 3724   | 1.424  | 166   | 71    | 198   | 0.358 | -1.481272 | 0.227 | 0 |
| chr11 | 9160374   | 9286873   | <b>DENND5A</b>   | - | 126499 | 2.195  | 9152  | 3903  | 10902 | 0.358 | -1.481855 | 0.208 | 0 |
| chr19 | 2164147   | 2232577   | <b>DOT1L</b>     | + | 68430  | 1.872  | 4085  | 1741  | 4866  | 0.358 | -1.482155 | 0.124 | 0 |
| chr2  | 39476421  | 39664219  | <b>MAP4K3</b>    | - | 187798 | 2.788  | 17467 | 7450  | 20806 | 0.358 | -1.481581 | 0.311 | 0 |
| chr1  | 46111451  | 46112357  | <b>RPS15AP10</b> | - | 906    | 2.467  | 74    | 31    | 88    | 0.358 | -1.480394 | 0.362 | 0 |
| chr2  | 189896640 | 190044605 | <b>COL5A2</b>    | - | 147965 | 7.404  | 37559 | 16049 | 44729 | 0.359 | -1.478744 | 0.504 | 0 |
| chr15 | 75966662  | 76005189  | <b>CSPG4</b>     | - | 38527  | 1.826  | 2241  | 958   | 2669  | 0.359 | -1.477197 | 0.105 | 0 |
| chr22 | 31721789  | 31742249  | <b>PATZ1</b>     | - | 20460  | 1.106  | 723   | 309   | 861   | 0.359 | -1.476702 | 0.123 | 0 |
| chr16 | 84509965  | 84538288  | <b>KIAA1609</b>  | - | 28323  | 5.032  | 4629  | 1983  | 5511  | 0.36  | -1.474133 | 0.142 | 0 |
| chr1  | 157963062 | 158065844 | <b>KIRREL</b>    | + | 102782 | 4.085  | 13767 | 5900  | 16390 | 0.36  | -1.474058 | 0.26  | 0 |
| chr4  | 128802015 | 128820377 | <b>PLK4</b>      | + | 18362  | 1.199  | 727   | 312   | 865   | 0.361 | -1.471432 | 0.142 | 0 |
| chr3  | 11597543  | 11762220  | <b>VGLL4</b>     | - | 164677 | 2.28   | 12425 | 5339  | 14788 | 0.361 | -1.469767 | 0.255 | 0 |
| chr3  | 105085556 | 105295757 | <b>ALCAM</b>     | + | 210201 | 4.079  | 29194 | 12578 | 34732 | 0.362 | -1.465279 | 0.439 | 0 |
| chr7  | 23349827  | 23509995  | <b>IGF2BP3</b>   | - | 160168 | 1.148  | 6035  | 2602  | 7179  | 0.362 | -1.464147 | 0.17  | 0 |

|       |           |           |                     |   |        |        |        |       |        |       |           |       |   |
|-------|-----------|-----------|---------------------|---|--------|--------|--------|-------|--------|-------|-----------|-------|---|
| chr16 | 85645028  | 85709812  | <b>KIAA0182</b>     | + | 64784  | 1.129  | 2344   | 1010  | 2789   | 0.362 | -1.465213 | 0.113 | 0 |
| chr17 | 38544772  | 38574202  | <b>TOP2A</b>        | - | 29430  | 3.918  | 3841   | 1655  | 4570   | 0.362 | -1.46509  | 0.15  | 0 |
| chr11 | 842823    | 867116    | <b>TSPAN4</b>       | - | 24293  | 1.523  | 1175   | 506   | 1399   | 0.362 | -1.467312 | 0.105 | 0 |
| chr3  | 141043054 | 141168632 | <b>ZBTB38</b>       | + | 125578 | 2.409  | 10026  | 4313  | 11931  | 0.362 | -1.467873 | 0.227 | 0 |
| chr11 | 35639734  | 35642421  | <b>FIX1</b>         | + | 2687   | 1.073  | 91     | 39    | 108    | 0.363 | -1.462856 | 0.309 | 0 |
| chr1  | 62920396  | 63153969  | <b>DOCK7</b>        | - | 233573 | 1.317  | 10174  | 4405  | 12098  | 0.364 | -1.457544 | 0.231 | 0 |
| chr7  | 77428108  | 77586821  | <b>PHTF2</b>        | + | 158713 | 1.476  | 7905   | 3424  | 9399   | 0.364 | -1.456554 | 0.219 | 0 |
| chr10 | 105353783 | 105615164 | <b>SH3PXD2A</b>     | - | 261381 | 1.748  | 14743  | 6382  | 17530  | 0.364 | -1.457782 | 0.266 | 0 |
| chr2  | 171847332 | 172087824 | <b>TLK1</b>         | - | 240492 | 1.515  | 12141  | 5255  | 14436  | 0.364 | -1.457725 | 0.261 | 0 |
| chr2  | 75719443  | 75796848  | <b>FAM176A</b>      | - | 77405  | 1.694  | 4359   | 1890  | 5182   | 0.365 | -1.455114 | 0.159 | 0 |
| chr3  | 108268717 | 108308491 | <b>KIAA1524</b>     | - | 39774  | 1.607  | 2101   | 912   | 2497   | 0.365 | -1.452586 | 0.13  | 0 |
| chr6  | 33359312  | 33377699  | <b>KIFC1</b>        | + | 18387  | 2.442  | 1458   | 632   | 1734   | 0.365 | -1.454052 | 0.119 | 0 |
| chr12 | 81191170  | 81331694  | <b>LIN7A</b>        | - | 140524 | 1.171  | 5458   | 2368  | 6488   | 0.365 | -1.454174 | 0.174 | 0 |
| chr4  | 129730778 | 129796379 | <b>PHF17</b>        | + | 65601  | 1.453  | 3134   | 1358  | 3726   | 0.365 | -1.455627 | 0.137 | 0 |
| chr1  | 116519118 | 116612675 | <b>SLC22A15</b>     | + | 93557  | 1.316  | 3995   | 1731  | 4749   | 0.365 | -1.455742 | 0.139 | 0 |
| chr7  | 17830384  | 17980131  | <b>SNX13</b>        | - | 149747 | 1.366  | 6732   | 2917  | 8003   | 0.365 | -1.455738 | 0.185 | 0 |
| chr3  | 88188261  | 88193814  | <b>ZNF654</b>       | + | 5553   | 2.007  | 375    | 162   | 445    | 0.365 | -1.452385 | 0.215 | 0 |
| chr5  | 304290    | 438405    | <b>AHRR</b>         | + | 134115 | 4.45   | 19304  | 8395  | 22941  | 0.366 | -1.450184 | 0.318 | 0 |
| chr10 | 63661012  | 63856707  | <b>ARID5B</b>       | + | 195695 | 6.854  | 43863  | 19087 | 52122  | 0.366 | -1.44931  | 0.519 | 0 |
| chr10 | 3818187   | 3827473   | <b>KLF6</b>         | - | 9286   | 52.937 | 15715  | 6840  | 18673  | 0.366 | -1.448714 | 0.273 | 0 |
| chr4  | 152041432 | 152149182 | <b>SH3D19</b>       | - | 107750 | 1.253  | 4582   | 1994  | 5444   | 0.366 | -1.44911  | 0.18  | 0 |
| chr2  | 69240275  | 69476459  | <b>ANTXR1</b>       | + | 236184 | 2.095  | 16235  | 7085  | 19285  | 0.367 | -1.444629 | 0.3   | 0 |
| chr12 | 105724413 | 105765296 | <b>C12orf75</b>     | + | 40883  | 19.969 | 27513  | 12005 | 32682  | 0.367 | -1.44477  | 0.427 | 0 |
| chr3  | 98514813  | 98620533  | <b>DCBLD2</b>       | - | 105720 | 3.162  | 10827  | 4716  | 12864  | 0.367 | -1.447653 | 0.227 | 0 |
| chr4  | 54851665  | 54853449  | <b>RPL21P44</b>     | - | 1784   | 1.235  | 72     | 31    | 86     | 0.367 | -1.444407 | 0.377 | 0 |
| chr8  | 124332090 | 124408705 | <b>ATAD2</b>        | - | 76615  | 1.558  | 3951   | 1729  | 4692   | 0.368 | -1.440398 | 0.156 | 0 |
| chr6  | 26240653  | 26241021  | <b>HIST1H4F</b>     | + | 368    | 3.623  | 43     | 18    | 51     | 0.368 | -1.44145  | 0.435 | 0 |
| chr7  | 73113534  | 73134017  | <b>STX1A</b>        | - | 20483  | 1.091  | 716    | 313   | 851    | 0.368 | -1.443411 | 0.136 | 0 |
| chr5  | 180650262 | 180662808 | <b>TRIM41</b>       | + | 12546  | 1.078  | 433    | 189   | 515    | 0.368 | -1.442164 | 0.169 | 0 |
| chr3  | 52082936  | 52090461  | <b>DUSP7</b>        | - | 7525   | 4.517  | 1081   | 474   | 1284   | 0.369 | -1.437193 | 0.116 | 0 |
| chr17 | 3627196   | 3629992   | <b>GSG2</b>         | + | 2796   | 1.678  | 150    | 66    | 179    | 0.369 | -1.439862 | 0.274 | 0 |
| chr19 | 18390562  | 18392432  | <b>JUND</b>         | - | 1870   | 28.045 | 1629   | 714   | 1934   | 0.369 | -1.437244 | 0.099 | 1 |
| chr17 | 39182278  | 39183454  | <b>KRTAP1-5</b>     | - | 1176   | 3.597  | 131    | 57    | 155    | 0.369 | -1.438511 | 0.262 | 0 |
| chr17 | 29421944  | 29704695  | <b>NF1</b>          | + | 282751 | 1.716  | 16194  | 7096  | 19227  | 0.369 | -1.43799  | 0.318 | 0 |
| chr8  | 38758752  | 38831430  | <b>PLEKHA2</b>      | + | 72678  | 3.092  | 7424   | 3253  | 8814   | 0.369 | -1.438027 | 0.205 | 0 |
| chr12 | 2966846   | 2986321   | <b>FOXM1</b>        | - | 19475  | 1.42   | 894    | 392   | 1061   | 0.37  | -1.434219 | 0.134 | 0 |
| chr7  | 104756822 | 105029341 | <b>SRPK2</b>        | - | 272519 | 1.568  | 14111  | 6192  | 16750  | 0.37  | -1.435625 | 0.285 | 0 |
| chr10 | 82214037  | 82282391  | <b>TSPAN14</b>      | + | 68354  | 2.505  | 5563   | 2446  | 6602   | 0.37  | -1.432502 | 0.169 | 0 |
| chr2  | 173940564 | 174132737 | <b>ZAK</b>          | + | 192173 | 2.022  | 12961  | 5687  | 15386  | 0.37  | -1.435828 | 0.28  | 0 |
| chr6  | 160390130 | 160527583 | <b>IGF2R</b>        | + | 137453 | 2.006  | 8858   | 3895  | 10512  | 0.371 | -1.432149 | 0.205 | 0 |
| chr9  | 19290748  | 19374139  | <b>DENND4C</b>      | + | 83391  | 1.016  | 2839   | 1252  | 3368   | 0.372 | -1.427397 | 0.155 | 0 |
| chr16 | 27325250  | 27376099  | <b>IL4R</b>         | + | 50849  | 1.361  | 2222   | 979   | 2636   | 0.372 | -1.428411 | 0.123 | 0 |
| chr14 | 24836144  | 24848810  | <b>NFATC4</b>       | + | 12666  | 2.177  | 874    | 385   | 1036   | 0.372 | -1.425816 | 0.125 | 0 |
| chr6  | 17615268  | 17706818  | <b>NUP153</b>       | - | 91550  | 2.168  | 6610   | 2915  | 7842   | 0.372 | -1.427628 | 0.203 | 0 |
| chr16 | 71678851  | 71748704  | <b>PHLPP2</b>       | - | 69853  | 1.128  | 2628   | 1158  | 3118   | 0.372 | -1.428439 | 0.149 | 0 |
| chr12 | 80167342  | 80329235  | <b>PPP1R12A</b>     | - | 161893 | 4.524  | 24859  | 10959 | 29492  | 0.372 | -1.428168 | 0.418 | 0 |
| chr7  | 47314751  | 47621742  | <b>TNS3</b>         | - | 306991 | 1.885  | 18590  | 8212  | 22050  | 0.372 | -1.424915 | 0.317 | 0 |
| chr11 | 2423522   | 2425106   | <b>TSSC4</b>        | + | 1584   | 2.695  | 135    | 60    | 161    | 0.372 | -1.424754 | 0.281 | 0 |
| chr6  | 17393735  | 17558023  | <b>CAP2</b>         | + | 164288 | 2.035  | 11234  | 4978  | 13319  | 0.374 | -1.419642 | 0.276 | 0 |
| chr5  | 74666927  | 74807806  | <b>COL4A3BP</b>     | - | 140879 | 2.123  | 9815   | 4347  | 11637  | 0.374 | -1.420538 | 0.237 | 0 |
| chr7  | 76670129  | 76778376  | <b>CYTH1</b>        | - | 108247 | 1.256  | 4456   | 1975  | 5282   | 0.374 | -1.419315 | 0.165 | 0 |
| chr20 | 62507483  | 62512243  | <b>LOC100505815</b> | + | 4760   | 3.032  | 454    | 201   | 538    | 0.374 | -1.418406 | 0.161 | 0 |
| chr3  | 47892179  | 48130769  | <b>MAP4</b>         | - | 238590 | 2.913  | 23132  | 10268 | 27420  | 0.374 | -1.417061 | 0.39  | 0 |
| chrY  | 7142012   | 7249588   | <b>PRKY</b>         | + | 107576 | 1.086  | 3782   | 1675  | 4484   | 0.374 | -1.419956 | 0.147 | 0 |
| chr1  | 222841354 | 222885864 | <b>AIDA</b>         | - | 44510  | 1.153  | 1694   | 752   | 2008   | 0.375 | -1.416845 | 0.139 | 0 |
| chr15 | 31619082  | 31670102  | <b>KLF13</b>        | + | 51020  | 2.128  | 3473   | 1543  | 4116   | 0.375 | -1.414964 | 0.138 | 0 |
| chr14 | 61201458  | 61435398  | <b>MNAT1</b>        | + | 233940 | 1.354  | 10513  | 4672  | 12459  | 0.375 | -1.414974 | 0.258 | 0 |
| chr11 | 4115923   | 4160106   | <b>RRM1</b>         | + | 44183  | 1.173  | 1719   | 763   | 2038   | 0.375 | -1.416857 | 0.142 | 0 |
| chr3  | 149086804 | 149095568 | <b>TM4SF1</b>       | - | 8764   | 2.861  | 813    | 361   | 964    | 0.375 | -1.413852 | 0.144 | 0 |
| chr17 | 79609348  | 79615779  | <b>TSPAN10</b>      | + | 6431   | 1.808  | 364    | 162   | 431    | 0.375 | -1.414031 | 0.179 | 0 |
| chr12 | 89981825  | 90049844  | <b>ATP2B1</b>       | - | 68019  | 2.849  | 6249   | 2786  | 7404   | 0.376 | -1.409839 | 0.182 | 0 |
| chr2  | 10443039  | 10567743  | <b>HPCAL1</b>       | + | 124704 | 1.117  | 4436   | 1976  | 5255   | 0.376 | -1.410671 | 0.148 | 0 |
| chr20 | 35405844  | 35492087  | <b>KIAA0889</b>     | - | 86243  | 2.693  | 7549   | 3375  | 8941   | 0.377 | -1.405622 | 0.207 | 0 |
| chr1  | 145611035 | 145688776 | <b>RNF115</b>       | + | 77741  | 2.206  | 5706   | 2546  | 6760   | 0.377 | -1.408262 | 0.196 | 0 |
| chr1  | 156904631 | 157015162 | <b>ARHGEF11</b>     | - | 110531 | 1.187  | 4295   | 1922  | 5086   | 0.378 | -1.403309 | 0.168 | 0 |
| chr7  | 134464163 | 134655480 | <b>CALD1</b>        | + | 191317 | 29.158 | 191036 | 85493 | 226218 | 0.378 | -1.403825 | 1     | 0 |
| chr6  | 26250369  | 26250835  | <b>HIST1H3F</b>     | - | 466    | 3.77   | 57     | 25    | 68     | 0.378 | -1.40284  | 0.417 | 0 |
| chr8  | 130853715 | 130952000 | <b>FAM49B</b>       | - | 98285  | 1.569  | 5121   | 2300  | 6061   | 0.379 | -1.397885 | 0.191 | 0 |
| chr1  | 68167148  | 68299155  | <b>GNG12</b>        | - | 132007 | 3.625  | 15763  | 7065  | 18662  | 0.379 | -1.401259 | 0.319 | 0 |
| chr11 | 118964584 | 118966177 | <b>H2AFX</b>        | - | 1593   | 6.695  | 336    | 150   | 397    | 0.379 | -1.398359 | 0.195 | 0 |
| chr17 | 47074773  | 47133507  | <b>IGF2BP1</b>      | + | 58734  | 1.726  | 3333   | 1494  | 3946   | 0.379 | -1.400313 | 0.158 | 0 |

|       |           |           |                     |   |        |       |       |       |       |       |           |       |   |
|-------|-----------|-----------|---------------------|---|--------|-------|-------|-------|-------|-------|-----------|-------|---|
| chr8  | 42273992  | 42397068  | <b>SLC20A2</b>      | - | 123076 | 2.807 | 11271 | 5055  | 13343 | 0.379 | -1.40025  | 0.259 | 0 |
| chr4  | 79697531  | 79833341  | <b>BMP2K</b>        | + | 135810 | 1.867 | 8347  | 3754  | 9878  | 0.38  | -1.395865 | 0.229 | 0 |
| chr8  | 116420723 | 116681228 | <b>TRPS1</b>        | + | 260505 | 1.583 | 13689 | 6153  | 16201 | 0.38  | -1.396762 | 0.305 | 0 |
| chr2  | 43449540  | 43453745  | <b>ZFP36L2</b>      | - | 4205   | 30.79 | 4072  | 1832  | 4819  | 0.38  | -1.395474 | 0.141 | 0 |
| chr8  | 74207264  | 74237516  | <b>RDH10</b>        | + | 30252  | 1.612 | 1652  | 745   | 1955  | 0.381 | -1.39149  | 0.166 | 0 |
| chr13 | 99102454  | 99229396  | <b>STK24</b>        | - | 126942 | 2.784 | 11416 | 5148  | 13505 | 0.381 | -1.391285 | 0.256 | 0 |
| chr1  | 21132784  | 21503381  | <b>EIF4G3</b>       | - | 370597 | 1.577 | 19448 | 8788  | 23001 | 0.382 | -1.388    | 0.37  | 0 |
| chr10 | 27961802  | 28034778  | <b>MKX</b>          | - | 72976  | 4.922 | 11808 | 5331  | 13968 | 0.382 | -1.389558 | 0.277 | 0 |
| chr12 | 111890017 | 112037480 | <b>ATXN2</b>        | - | 147463 | 2.798 | 13680 | 6198  | 16174 | 0.383 | -1.383718 | 0.309 | 0 |
| chr10 | 71029755  | 71161637  | <b>HK1</b>          | + | 131882 | 1.531 | 6483  | 2934  | 7666  | 0.383 | -1.385595 | 0.19  | 0 |
| chr4  | 57897243  | 57976539  | <b>IGFBP7</b>       | - | 79296  | 7.443 | 19387 | 8781  | 22922 | 0.383 | -1.384294 | 0.359 | 0 |
| chr20 | 48429249  | 48508772  | <b>SLC9A8</b>       | + | 79523  | 1.324 | 3420  | 1550  | 4043  | 0.383 | -1.382716 | 0.157 | 0 |
| chr13 | 50556687  | 50699677  | <b>DLEU2</b>        | - | 142990 | 1.72  | 8147  | 3699  | 9630  | 0.384 | -1.380328 | 0.24  | 0 |
| chr6  | 27833106  | 27833576  | <b>HIST1H2AL</b>    | + | 470    | 2.607 | 39    | 18    | 46    | 0.384 | -1.380474 | 0.468 | 0 |
| chr19 | 11200037  | 11244505  | <b>LDLR</b>         | - | 44468  | 4.565 | 6353  | 2883  | 7510  | 0.384 | -1.381025 | 0.173 | 0 |
| chr5  | 71515235  | 71616084  | <b>MRPS27</b>       | - | 100849 | 1.246 | 4161  | 1888  | 4919  | 0.384 | -1.381091 | 0.183 | 0 |
| chr8  | 19171080  | 19253729  | <b>SH2D4A</b>       | + | 82649  | 2.316 | 6330  | 2870  | 7483  | 0.384 | -1.382247 | 0.213 | 0 |
| chr10 | 126630691 | 126676005 | <b>ZRANB1</b>       | + | 45314  | 1.532 | 2309  | 1048  | 2730  | 0.384 | -1.381307 | 0.161 | 0 |
| chr6  | 129204285 | 129837710 | <b>LAMA2</b>        | + | 633425 | 1.729 | 36894 | 16798 | 43593 | 0.385 | -1.375765 | 0.535 | 0 |
| chr19 | 3359560   | 3469215   | <b>NFIC</b>         | + | 109655 | 1.828 | 6443  | 2931  | 7613  | 0.385 | -1.37691  | 0.193 | 0 |
| chr1  | 186369703 | 186370587 | <b>OCLM</b>         | + | 884    | 1.944 | 56    | 25    | 66    | 0.385 | -1.377065 | 0.435 | 0 |
| chr10 | 16632616  | 16859453  | <b>RSU1</b>         | - | 226837 | 1.591 | 11894 | 5405  | 14057 | 0.385 | -1.378906 | 0.284 | 0 |
| chr13 | 99852678  | 100038753 | <b>UBAC2</b>        | - | 186075 | 1.029 | 6238  | 2835  | 7372  | 0.385 | -1.378606 | 0.202 | 0 |
| chr12 | 50898767  | 51142450  | <b>DIP2B</b>        | + | 243683 | 1.014 | 8166  | 3724  | 9646  | 0.386 | -1.372778 | 0.242 | 0 |
| chr6  | 26045638  | 26046097  | <b>HIST1H3C</b>     | + | 459    | 9.116 | 135   | 61    | 160   | 0.386 | -1.37426  | 0.318 | 0 |
| chr4  | 14113591  | 14141676  | <b>LOC152742</b>    | + | 28085  | 2.394 | 2194  | 1000  | 2592  | 0.386 | -1.374374 | 0.149 | 0 |
| chr9  | 20344967  | 20622514  | <b>MLT3</b>         | - | 277547 | 1.264 | 11817 | 5385  | 13961 | 0.386 | -1.374356 | 0.306 | 0 |
| chr10 | 98741040  | 98745585  | <b>C10orf12</b>     | + | 4545   | 1.777 | 266   | 121   | 314   | 0.387 | -1.367789 | 0.266 | 0 |
| chr18 | 12991360  | 13125051  | <b>CEP192</b>       | + | 133691 | 1.458 | 6404  | 2923  | 7564  | 0.387 | -1.37141  | 0.214 | 0 |
| chr9  | 127115751 | 127121463 | <b>LOC100129034</b> | + | 5712   | 3.914 | 716   | 327   | 846   | 0.387 | -1.369197 | 0.158 | 0 |
| chr6  | 111620233 | 111804414 | <b>REV3L</b>        | - | 184181 | 3.122 | 19032 | 8699  | 22476 | 0.387 | -1.369388 | 0.37  | 0 |
| chr19 | 31765850  | 31840190  | <b>TSHZ3</b>        | - | 74340  | 1.438 | 3504  | 1600  | 4139  | 0.387 | -1.371045 | 0.17  | 0 |
| chr10 | 75183336  | 75193314  | <b>ZMYND17</b>      | - | 9983   | 1.061 | 350   | 160   | 414   | 0.387 | -1.368614 | 0.242 | 0 |
| chr19 | 19496641  | 19619741  | <b>GATAD2A</b>      | + | 123100 | 2.126 | 8441  | 3864  | 9966  | 0.388 | -1.366723 | 0.228 | 0 |
| chr18 | 21111462  | 21166581  | <b>NPC1</b>         | - | 55119  | 3.177 | 5637  | 2581  | 6655  | 0.388 | -1.366291 | 0.188 | 0 |
| chr3  | 150126787 | 150177615 | <b>TSC22D2</b>      | + | 50828  | 8.786 | 14934 | 6835  | 17633 | 0.388 | -1.367164 | 0.339 | 0 |
| chr21 | 27252860  | 27543446  | <b>APP</b>          | - | 290586 | 2.189 | 20862 | 9582  | 24622 | 0.389 | -1.361557 | 0.382 | 0 |
| chr2  | 75059781  | 75120481  | <b>HK2</b>          | + | 60700  | 2.632 | 5072  | 2329  | 5986  | 0.389 | -1.36172  | 0.172 | 0 |
| chr8  | 30241943  | 30429794  | <b>RBPM5</b>        | + | 187791 | 3.554 | 21850 | 10042 | 25786 | 0.389 | -1.360497 | 0.39  | 0 |
| chr5  | 114938176 | 114948904 | <b>TMED7-TICAM2</b> | - | 10728  | 2.061 | 719   | 330   | 848   | 0.389 | -1.36192  | 0.172 | 0 |
| chr1  | 45205489  | 45233438  | <b>KIF2C</b>        | + | 27949  | 1.612 | 1461  | 673   | 1724  | 0.39  | -1.357181 | 0.148 | 0 |
| chr18 | 12446510  | 12657912  | <b>SPIRE1</b>       | - | 211402 | 1.053 | 7380  | 3396  | 8708  | 0.39  | -1.35847  | 0.24  | 0 |
| chr4  | 37892719  | 38140794  | <b>TBC1D1</b>       | + | 248075 | 1.017 | 8355  | 3845  | 9859  | 0.39  | -1.358183 | 0.252 | 0 |
| chr12 | 100430862 | 100536642 | <b>UHRF1BP1L</b>    | - | 105780 | 1.249 | 4383  | 2017  | 5172  | 0.39  | -1.358444 | 0.196 | 0 |
| chr16 | 84733554  | 84813527  | <b>USP10</b>        | + | 79973  | 2.149 | 5630  | 2592  | 6642  | 0.39  | -1.357261 | 0.206 | 0 |
| chr9  | 108210314 | 108311385 | <b>FSD1L</b>        | + | 101071 | 1.162 | 3867  | 1783  | 4562  | 0.391 | -1.35457  | 0.186 | 0 |
| chr12 | 120648241 | 120703574 | <b>PXN</b>          | - | 55333  | 4.979 | 8802  | 4066  | 10381 | 0.392 | -1.352261 | 0.231 | 0 |
| chr12 | 26111963  | 26232825  | <b>RASSF8</b>       | + | 120862 | 2.48  | 9930  | 4592  | 11709 | 0.392 | -1.350204 | 0.278 | 0 |
| chr4  | 80822770  | 80994477  | <b>ANTXR2</b>       | - | 171707 | 1.655 | 9362  | 4341  | 11035 | 0.393 | -1.345905 | 0.269 | 0 |
| chr22 | 40806291  | 41032690  | <b>MKL1</b>         | + | 226399 | 2.253 | 17146 | 7940  | 20214 | 0.393 | -1.348116 | 0.375 | 0 |
| chr6  | 117803819 | 117891020 | <b>DCBLD1</b>       | + | 87201  | 3.106 | 8808  | 4093  | 10379 | 0.394 | -1.342284 | 0.251 | 0 |
| chr19 | 6210391   | 6279959   | <b>MLLT1</b>        | - | 69568  | 1.284 | 2859  | 1328  | 3369  | 0.394 | -1.342681 | 0.154 | 0 |
| chr5  | 140810157 | 140812789 | <b>PCDHGA12</b>     | + | 2632   | 1.596 | 132   | 61    | 156   | 0.394 | -1.343765 | 0.313 | 0 |
| chr15 | 77400497  | 77712446  | <b>PEAK1</b>        | - | 311949 | 2.466 | 26002 | 12067 | 30647 | 0.394 | -1.344629 | 0.468 | 0 |
| chr11 | 66099541  | 66104000  | <b>RIN1</b>         | - | 4459   | 4.955 | 697   | 324   | 822   | 0.394 | -1.342876 | 0.159 | 0 |
| chr9  | 33817181  | 33920401  | <b>UBE2R2</b>       | + | 103220 | 2.096 | 7121  | 3308  | 8391  | 0.394 | -1.342586 | 0.237 | 0 |
| chr22 | 19023794  | 19109967  | <b>DGCR2</b>        | - | 86173  | 1.377 | 3834  | 1785  | 4517  | 0.395 | -1.33895  | 0.177 | 0 |
| chr4  | 99182526  | 99365012  | <b>RAP1GDS1</b>     | + | 182486 | 1.695 | 10402 | 4841  | 12256 | 0.395 | -1.340002 | 0.304 | 0 |
| chr16 | 11439310  | 11445617  | <b>RMI2</b>         | + | 6307   | 1.037 | 209   | 97    | 247   | 0.395 | -1.338495 | 0.278 | 0 |
| chr17 | 17746821  | 17875784  | <b>TOM1L2</b>       | - | 128963 | 1.158 | 4855  | 2258  | 5721  | 0.395 | -1.341253 | 0.195 | 0 |
| chr2  | 145141941 | 145277958 | <b>ZEB2</b>         | - | 136017 | 2.236 | 10082 | 4696  | 11877 | 0.395 | -1.338545 | 0.285 | 0 |
| chr12 | 109038886 | 109125295 | <b>CORO1C</b>       | - | 86409  | 8.293 | 23482 | 10941 | 27662 | 0.396 | -1.33814  | 0.418 | 0 |
| chr19 | 17186590  | 17324104  | <b>MYO9B</b>        | + | 137514 | 1.586 | 7044  | 3286  | 8296  | 0.396 | -1.335931 | 0.225 | 0 |
| chr3  | 128444978 | 128533641 | <b>RAB7A</b>        | + | 88663  | 4.711 | 13532 | 6316  | 15937 | 0.396 | -1.335349 | 0.31  | 0 |
| chr11 | 102706527 | 102714342 | <b>MMP3</b>         | - | 7815   | 1.499 | 374   | 174   | 440   | 0.397 | -1.332818 | 0.223 | 0 |
| chr5  | 176560079 | 176727214 | <b>NSD1</b>         | + | 167135 | 1.537 | 8500  | 3977  | 10007 | 0.397 | -1.330995 | 0.268 | 0 |
| chr22 | 36134782  | 36424585  | <b>RBFOX2</b>       | - | 289803 | 2.686 | 25800 | 12065 | 30379 | 0.397 | -1.332238 | 0.454 | 0 |
| chr11 | 111473169 | 111597632 | <b>SIK2</b>         | + | 124463 | 1.166 | 4846  | 2265  | 5707  | 0.397 | -1.333315 | 0.221 | 0 |
| chr14 | 61447831  | 61550451  | <b>SLC38A6</b>      | + | 102620 | 1.184 | 3892  | 1821  | 4583  | 0.397 | -1.331114 | 0.174 | 0 |
| chr18 | 21572736  | 21715574  | <b>TTC39C</b>       | + | 142838 | 1.895 | 8852  | 4142  | 10422 | 0.397 | -1.331056 | 0.262 | 0 |
| chr1  | 43824625  | 43828873  | <b>CDC20</b>        | + | 4248   | 3.018 | 415   | 194   | 489   | 0.398 | -1.328682 | 0.227 | 0 |

|       |           |           |                  |   |        |        |       |       |       |       |           |       |   |
|-------|-----------|-----------|------------------|---|--------|--------|-------|-------|-------|-------|-----------|-------|---|
| chr12 | 51985019  | 52202299  | <b>SCN8A</b>     | + | 217280 | 1.71   | 12371 | 5790  | 14564 | 0.398 | -1.330788 | 0.325 | 0 |
| chr11 | 27676441  | 27743605  | <b>BDNF</b>      | - | 67164  | 8.176  | 18557 | 8722  | 21836 | 0.399 | -1.323886 | 0.407 | 0 |
| chr6  | 27100094  | 27100575  | <b>HIST1H2BJ</b> | - | 481    | 2.307  | 36    | 17    | 42    | 0.399 | -1.325008 | 0.52  | 0 |
| chr2  | 176987412 | 176989645 | <b>HOXD9</b>     | + | 2233   | 1.501  | 107   | 50    | 126   | 0.399 | -1.326292 | 0.359 | 0 |
| chr22 | 24236564  | 24237409  | <b>MIF</b>       | + | 845    | 11.809 | 316   | 148   | 372   | 0.399 | -1.326107 | 0.232 | 0 |
| chr19 | 47634079  | 47713893  | <b>SAE1</b>      | + | 79814  | 2.022  | 5262  | 2472  | 6192  | 0.399 | -1.324474 | 0.211 | 0 |
| chr16 | 3775055   | 3930121   | <b>CREBBP</b>    | - | 155066 | 2.645  | 13431 | 6325  | 15800 | 0.4   | -1.320708 | 0.327 | 0 |
| chr13 | 45694630  | 45858239  | <b>GTF2F2</b>    | + | 163609 | 1.17   | 6354  | 2990  | 7475  | 0.4   | -1.321685 | 0.242 | 0 |
| chr19 | 13261281  | 13265718  | <b>IER2</b>      | + | 4437   | 12.949 | 1789  | 842   | 2105  | 0.4   | -1.321669 | 0.136 | 0 |
| chr14 | 50885210  | 50999376  | <b>MAP4K5</b>    | - | 114166 | 2.853  | 10904 | 5134  | 12828 | 0.4   | -1.32112  | 0.316 | 0 |
| chr2  | 159825145 | 160089170 | <b>TANC1</b>     | + | 264025 | 1.321  | 11425 | 5373  | 13443 | 0.4   | -1.322978 | 0.301 | 0 |
| chr8  | 119935795 | 119964383 | <b>TNFRSF11B</b> | - | 28588  | 26.789 | 24939 | 11740 | 29338 | 0.4   | -1.321269 | 0.434 | 0 |
| chr15 | 101715927 | 101792137 | <b>CHSY1</b>     | - | 76210  | 2.343  | 5807  | 2741  | 6829  | 0.401 | -1.316961 | 0.22  | 0 |
| chr17 | 26369687  | 26523404  | <b>NLK</b>       | + | 153717 | 2.178  | 11272 | 5317  | 13257 | 0.401 | -1.317993 | 0.328 | 0 |
| chr10 | 133747959 | 133770053 | <b>PPP2R2D</b>   | + | 22094  | 1.199  | 858   | 404   | 1009  | 0.401 | -1.318917 | 0.176 | 0 |
| chr2  | 37477645  | 37544222  | <b>PRKD3</b>     | - | 66577  | 1.248  | 2770  | 1307  | 3258  | 0.401 | -1.317732 | 0.195 | 0 |
| chr3  | 10327437  | 10335133  | <b>GHRLOS</b>    | + | 7696   | 1.097  | 270   | 127   | 317   | 0.402 | -1.314835 | 0.264 | 0 |
| chr15 | 101459459 | 101610317 | <b>LRRK1</b>     | + | 150858 | 1.326  | 6485  | 3065  | 7625  | 0.402 | -1.314853 | 0.227 | 0 |
| chr20 | 43595119  | 43708593  | <b>STK4</b>      | + | 113474 | 1.601  | 5918  | 2794  | 6959  | 0.402 | -1.316481 | 0.223 | 0 |
| chr4  | 85590692  | 85887544  | <b>WDFY3</b>     | - | 296852 | 1.61   | 15978 | 7553  | 18786 | 0.402 | -1.314424 | 0.375 | 0 |
| chr16 | 75327607  | 75467387  | <b>CFDP1</b>     | - | 139780 | 1.111  | 5085  | 2408  | 5977  | 0.403 | -1.311159 | 0.218 | 0 |
| chr9  | 91150015  | 91190704  | <b>SNXNL2</b>    | + | 40689  | 1.398  | 1819  | 861   | 2138  | 0.403 | -1.312458 | 0.155 | 0 |
| chr11 | 126226095 | 126284533 | <b>ST3GAL4</b>   | + | 58438  | 1.187  | 2261  | 1070  | 2658  | 0.403 | -1.312456 | 0.174 | 0 |
| chr3  | 156392204 | 156424557 | <b>TIPARP</b>    | + | 32353  | 17.65  | 18706 | 8885  | 21980 | 0.404 | -1.306654 | 0.387 | 0 |
| chr12 | 98909350  | 98944157  | <b>TMPO</b>      | + | 34807  | 2.198  | 2515  | 1194  | 2956  | 0.404 | -1.306972 | 0.186 | 0 |
| chr13 | 113139327 | 113242481 | <b>TUBGCP3</b>   | - | 103154 | 1.423  | 4816  | 2284  | 5660  | 0.404 | -1.308695 | 0.217 | 0 |
| chr12 | 6957971   | 6960456   | <b>CDCA3</b>     | - | 2485   | 3.442  | 274   | 130   | 322   | 0.405 | -1.305666 | 0.269 | 0 |
| chr22 | 19318223  | 19419219  | <b>HIRA</b>      | - | 100996 | 1.121  | 3664  | 1745  | 4304  | 0.405 | -1.302261 | 0.19  | 0 |
| chr3  | 8543510   | 8609806   | <b>LMCD1</b>     | + | 66296  | 1.233  | 2636  | 1257  | 3095  | 0.406 | -1.299877 | 0.175 | 0 |
| chr7  | 6201411   | 6312242   | <b>CYTH3</b>     | - | 110831 | 2.927  | 10769 | 5144  | 12644 | 0.407 | -1.2974   | 0.318 | 0 |
| chr1  | 175913966 | 176176370 | <b>RFWD2</b>     | - | 262404 | 1.395  | 12134 | 5802  | 14245 | 0.407 | -1.295835 | 0.335 | 0 |
| chr1  | 28837404  | 28865708  | <b>RCC1</b>      | + | 28304  | 2.203  | 2025  | 970   | 2377  | 0.408 | -1.293051 | 0.177 | 0 |
| chr12 | 96672038  | 96794366  | <b>CDK17</b>     | - | 122328 | 2.276  | 9239  | 4435  | 10840 | 0.409 | -1.289403 | 0.301 | 0 |
| chr10 | 73724119  | 73773322  | <b>CHST3</b>     | + | 49203  | 2.244  | 3563  | 1709  | 4181  | 0.409 | -1.290604 | 0.191 | 0 |
| chr5  | 138089106 | 138270723 | <b>CTNNA1</b>    | + | 181617 | 2.811  | 16837 | 8071  | 19759 | 0.409 | -1.291581 | 0.382 | 0 |
| chr10 | 95066185  | 95242074  | <b>MYOF</b>      | - | 175889 | 8.783  | 50781 | 24362 | 59588 | 0.409 | -1.290354 | 0.641 | 0 |
| chr6  | 64356430  | 64424405  | <b>PHF3</b>      | + | 67975  | 1.659  | 3729  | 1788  | 4376  | 0.409 | -1.291216 | 0.215 | 0 |
| chr3  | 57743173  | 57914894  | <b>SLMAP</b>     | + | 171721 | 1.014  | 5780  | 2776  | 6781  | 0.409 | -1.288407 | 0.25  | 0 |
| chr1  | 27022521  | 27108601  | <b>ARID1A</b>    | + | 86080  | 3.223  | 9155  | 4401  | 10739 | 0.41  | -1.286832 | 0.295 | 0 |
| chr1  | 47715810  | 47779819  | <b>STIL</b>      | - | 64009  | 1.089  | 2302  | 1108  | 2700  | 0.41  | -1.285051 | 0.195 | 0 |
| chr2  | 25016174  | 25045245  | <b>CENPO</b>     | + | 29071  | 1.49   | 1397  | 674   | 1638  | 0.411 | -1.281489 | 0.174 | 0 |
| chr18 | 657603    | 673499    | <b>TYMS</b>      | + | 15896  | 2.472  | 1272  | 613   | 1492  | 0.411 | -1.283176 | 0.177 | 0 |
| chr10 | 24872537  | 25012597  | <b>ARHGAP21</b>  | - | 140060 | 2.76   | 12867 | 6221  | 15082 | 0.413 | -1.277502 | 0.356 | 0 |
| chr5  | 10679341  | 10761387  | <b>DAP</b>       | - | 82046  | 3.888  | 10348 | 5005  | 12129 | 0.413 | -1.276939 | 0.301 | 0 |
| chr9  | 95375465  | 95432547  | <b>IPPK</b>      | - | 57082  | 1.495  | 2753  | 1332  | 3227  | 0.413 | -1.275819 | 0.187 | 0 |
| chr16 | 74655296  | 74700779  | <b>RFWD3</b>     | - | 45483  | 2.5    | 3714  | 1799  | 4353  | 0.413 | -1.274594 | 0.211 | 0 |
| chr14 | 38677203  | 38682268  | <b>SSTR1</b>     | + | 5065   | 26.959 | 4358  | 2107  | 5108  | 0.413 | -1.277461 | 0.2   | 0 |
| chr11 | 64883874  | 64885170  | <b>ZNHIT2</b>    | - | 1296   | 1.005  | 40    | 19    | 47    | 0.413 | -1.277397 | 0.49  | 0 |
| chr12 | 46123619  | 46301819  | <b>ARID2</b>     | + | 178200 | 1.102  | 6552  | 3181  | 7676  | 0.414 | -1.270964 | 0.277 | 0 |
| chr20 | 34995443  | 35157040  | <b>DLGAP4</b>    | + | 161597 | 1.026  | 5363  | 2602  | 6284  | 0.414 | -1.271992 | 0.228 | 0 |
| chr8  | 117657054 | 117768062 | <b>EIF3H</b>     | - | 111008 | 2.143  | 7857  | 3808  | 9207  | 0.414 | -1.273739 | 0.284 | 0 |
| chr16 | 55513080  | 55540586  | <b>MIMP2</b>     | + | 27506  | 5.143  | 4503  | 2186  | 5275  | 0.414 | -1.270819 | 0.203 | 0 |
| chr5  | 36876860  | 37065921  | <b>NIPBL</b>     | + | 189061 | 1.928  | 12237 | 5936  | 14337 | 0.414 | -1.272047 | 0.359 | 0 |
| chr9  | 133589267 | 133763062 | <b>ABL1</b>      | + | 173795 | 1.361  | 7804  | 3796  | 9140  | 0.415 | -1.267392 | 0.285 | 0 |
| chr6  | 74405507  | 74538041  | <b>CD109</b>     | + | 132534 | 1.514  | 6521  | 3170  | 7638  | 0.415 | -1.268847 | 0.251 | 0 |
| chr1  | 227177565 | 227505826 | <b>CDC42BPA</b>  | - | 328261 | 1.812  | 19940 | 9683  | 23358 | 0.415 | -1.270403 | 0.442 | 0 |
| chr7  | 156931654 | 157062066 | <b>UBE3C</b>     | + | 130412 | 1.76   | 7529  | 3658  | 8819  | 0.415 | -1.269627 | 0.276 | 0 |
| chr2  | 11321777  | 11484711  | <b>ROCK2</b>     | - | 162934 | 2.946  | 16134 | 7867  | 18889 | 0.416 | -1.263616 | 0.409 | 0 |
| chr19 | 16178316  | 16213813  | <b>TPM4</b>      | + | 35497  | 9.074  | 10471 | 5105  | 12260 | 0.416 | -1.263803 | 0.31  | 0 |
| chr12 | 104609558 | 104744062 | <b>TXNRD1</b>    | + | 134504 | 6.673  | 30254 | 14728 | 35429 | 0.416 | -1.266382 | 0.54  | 0 |
| chr13 | 111767623 | 111958081 | <b>ARHGEF7</b>   | + | 190458 | 1.593  | 9857  | 4810  | 11539 | 0.417 | -1.262232 | 0.303 | 0 |
| chr1  | 246729638 | 246831884 | <b>CNST</b>      | + | 102246 | 3.425  | 11608 | 5662  | 13590 | 0.417 | -1.263074 | 0.343 | 0 |
| chr15 | 80987651  | 81047962  | <b>FAM108C1</b>  | + | 60311  | 2.712  | 5374  | 2624  | 6291  | 0.417 | -1.261318 | 0.248 | 0 |
| chr12 | 124808956 | 125052010 | <b>NCOR2</b>     | - | 243054 | 1.905  | 14905 | 7282  | 17446 | 0.417 | -1.26038  | 0.355 | 0 |
| chr12 | 57449425  | 57472574  | <b>TMEM194A</b>  | - | 23149  | 1.007  | 758   | 370   | 888   | 0.417 | -1.261692 | 0.212 | 0 |
| chr22 | 41641614  | 41682216  | <b>ZRNGAP1</b>   | - | 40602  | 3.102  | 4062  | 1986  | 4754  | 0.418 | -1.259129 | 0.212 | 0 |
| chr5  | 60628099  | 60841999  | <b>RSWIM6</b>    | + | 213900 | 1.852  | 13178 | 6442  | 15424 | 0.418 | -1.259597 | 0.368 | 0 |
| chr7  | 32535175  | 32623779  | <b>AVL9</b>      | + | 88604  | 2.245  | 6528  | 3202  | 7636  | 0.419 | -1.253681 | 0.27  | 0 |
| chr6  | 118781934 | 119031238 | <b>CEP85L</b>    | - | 249304 | 1.324  | 10824 | 5305  | 12664 | 0.419 | -1.255159 | 0.329 | 0 |
| chr4  | 71859264  | 71896629  | <b>DCK</b>       | + | 37365  | 1.196  | 1463  | 717   | 1712  | 0.419 | -1.256243 | 0.196 | 0 |
| chr7  | 148504463 | 148581441 | <b>EZH2</b>      | - | 76978  | 1.331  | 3368  | 1651  | 3940  | 0.419 | -1.254424 | 0.221 | 0 |

|       |           |           |           |   |        |       |       |       |       |       |           |       |   |
|-------|-----------|-----------|-----------|---|--------|-------|-------|-------|-------|-------|-----------|-------|---|
| chr17 | 17115526  | 17140502  | FLCN      | - | 24976  | 2.737 | 2152  | 1055  | 2517  | 0.419 | -1.253665 | 0.17  | 0 |
| chr16 | 86612114  | 86615304  | FOXL1     | + | 3190   | 3.814 | 383   | 187   | 448   | 0.419 | -1.256239 | 0.242 | 0 |
| chr19 | 39616419  | 39670046  | PAK4      | + | 53627  | 1.247 | 2127  | 1043  | 2488  | 0.419 | -1.253377 | 0.178 | 0 |
| chr13 | 28712642  | 28869475  | PAN3      | + | 156833 | 2.197 | 11445 | 5609  | 13390 | 0.419 | -1.255303 | 0.347 | 0 |
| chr7  | 5659671   | 5821361   | RNF216    | - | 161690 | 1.563 | 8317  | 4073  | 9732  | 0.419 | -1.256667 | 0.297 | 0 |
| chr7  | 98625057  | 98741743  | SMURF1    | - | 116686 | 2.454 | 9395  | 4608  | 10991 | 0.419 | -1.254073 | 0.21  | 0 |
| chr22 | 50166936  | 50218452  | BRD1      | - | 51516  | 2.806 | 4630  | 2274  | 5415  | 0.42  | -1.251491 | 0.318 | 0 |
| chr15 | 42191638  | 42264755  | EHD4      | - | 73117  | 1.603 | 3784  | 1859  | 4426  | 0.42  | -1.251157 | 0.213 | 0 |
| chr5  | 172261222 | 172379688 | ERGIC1    | + | 118466 | 1.684 | 6487  | 3187  | 7587  | 0.42  | -1.251297 | 0.26  | 0 |
| chr5  | 134670070 | 134735577 | H2AFY     | - | 65507  | 3.811 | 8079  | 3965  | 9450  | 0.42  | -1.253028 | 0.278 | 0 |
| chr15 | 69706626  | 69740764  | KIF23     | + | 34138  | 3.277 | 3690  | 1813  | 4315  | 0.42  | -1.251174 | 0.229 | 0 |
| chr7  | 39663151  | 39747723  | RALA      | + | 84572  | 2.561 | 7091  | 3483  | 8293  | 0.42  | -1.251658 | 0.277 | 0 |
| chr18 | 59854523  | 59974355  | KIAA1468  | + | 119832 | 1.355 | 5368  | 2641  | 6277  | 0.421 | -1.248801 | 0.26  | 0 |
| chr14 | 71374121  | 71582099  | PCNX      | + | 207978 | 1.756 | 12141 | 5987  | 14193 | 0.422 | -1.24519  | 0.362 | 0 |
| chr5  | 67511583  | 67597649  | FAM3R1    | + | 86066  | 3.61  | 10262 | 5064  | 11995 | 0.422 | -1.243948 | 0.335 | 0 |
| chr14 | 77972339  | 78083110  | SPTLC2    | - | 110771 | 3.069 | 11378 | 5611  | 13301 | 0.422 | -1.24522  | 0.359 | 0 |
| chr2  | 69685126  | 69870977  | AAK1      | - | 185851 | 2.719 | 16726 | 8271  | 19545 | 0.423 | -1.240598 | 0.412 | 0 |
| chr4  | 56298659  | 56412997  | CLOCK     | - | 114338 | 1.848 | 7027  | 3473  | 8211  | 0.423 | -1.241215 | 0.297 | 0 |
| chr10 | 86088409  | 86278276  | FAM190B   | + | 189867 | 1.904 | 11876 | 5870  | 13878 | 0.423 | -1.241387 | 0.349 | 0 |
| chr7  | 27565058  | 27702620  | HIBADH    | - | 137562 | 1.045 | 4824  | 2383  | 5637  | 0.423 | -1.242074 | 0.27  | 0 |
| chr12 | 88886569  | 88974250  | KITLG     | - | 87681  | 4.332 | 12658 | 6260  | 14790 | 0.423 | -1.240389 | 0.374 | 0 |
| chr19 | 44235300  | 44259142  | SMG9      | - | 23842  | 1.294 | 998   | 493   | 1166  | 0.423 | -1.242083 | 0.2   | 0 |
| chr19 | 10828728  | 10942586  | DNM2      | + | 113858 | 1.601 | 5871  | 2909  | 6858  | 0.424 | -1.237254 | 0.248 | 0 |
| chr5  | 31400601  | 31532282  | DROSHA    | - | 131681 | 1.041 | 4498  | 2229  | 5255  | 0.424 | -1.23727  | 0.244 | 0 |
| chr12 | 69864128  | 69973562  | FRS2      | + | 109434 | 2.575 | 9302  | 4606  | 10867 | 0.424 | -1.238273 | 0.324 | 0 |
| chr7  | 4721929   | 4811074   | FOXK1     | + | 89145  | 1.277 | 3630  | 1802  | 4239  | 0.425 | -1.233583 | 0.208 | 0 |
| chr2  | 174937174 | 175113365 | OLA1      | - | 176191 | 1.217 | 7104  | 3523  | 8297  | 0.425 | -1.235777 | 0.297 | 0 |
| chr21 | 17102495  | 17252377  | USP25     | + | 149882 | 1.2   | 5982  | 2966  | 6987  | 0.425 | -1.235894 | 0.282 | 0 |
| chr1  | 109419602 | 109473044 | GPSM2     | + | 53442  | 1.222 | 2154  | 1072  | 2515  | 0.426 | -1.230127 | 0.219 | 0 |
| chr17 | 14204505  | 14249492  | HS3ST3B1  | + | 44987  | 1.766 | 2587  | 1288  | 3020  | 0.426 | -1.229491 | 0.214 | 0 |
| chr3  | 110790605 | 110913016 | PVRL3     | + | 122411 | 3.769 | 15665 | 7791  | 18290 | 0.426 | -1.231189 | 0.434 | 0 |
| chr12 | 8850517   | 8929787   | RIMKLB    | + | 79270  | 1.259 | 3263  | 1623  | 3809  | 0.426 | -1.230395 | 0.226 | 0 |
| chr20 | 56964174  | 57026156  | VAPB      | + | 61982  | 2.25  | 4553  | 2262  | 5317  | 0.426 | -1.232736 | 0.242 | 0 |
| chr7  | 21940516  | 21985542  | CDCA7L    | - | 45026  | 1.187 | 1728  | 861   | 2017  | 0.427 | -1.227949 | 0.199 | 0 |
| chr13 | 42614171  | 42803891  | DGKH      | + | 189720 | 1.059 | 6685  | 3334  | 7801  | 0.427 | -1.226248 | 0.301 | 0 |
| chr5  | 139505520 | 139508391 | IGIP      | + | 2871   | 1.814 | 172   | 85    | 201   | 0.427 | -1.228794 | 0.382 | 0 |
| chr9  | 21802634  | 21865969  | MTAP      | + | 63335  | 1.569 | 3247  | 1617  | 3791  | 0.427 | -1.228892 | 0.226 | 0 |
| chr12 | 118587605 | 118810750 | TAOK3     | - | 223145 | 1.173 | 8700  | 4334  | 10155 | 0.427 | -1.228257 | 0.328 | 0 |
| chr2  | 85198230  | 85286595  | KCMF1     | + | 88365  | 4.258 | 12544 | 6260  | 14638 | 0.428 | -1.225487 | 0.38  | 0 |
| chr20 | 34359922  | 34538288  | PHF20     | + | 178366 | 1.202 | 7059  | 3524  | 8238  | 0.428 | -1.224989 | 0.296 | 0 |
| chr6  | 35310334  | 35395968  | PPARD     | + | 85634  | 1.781 | 4937  | 2471  | 5759  | 0.429 | -1.220293 | 0.247 | 0 |
| chr11 | 68228185  | 68382801  | PPP6R3    | + | 154616 | 2.492 | 12695 | 6358  | 14807 | 0.429 | -1.219491 | 0.374 | 0 |
| chr18 | 9708227   | 9862553   | RAB31     | + | 154326 | 1.358 | 6857  | 3434  | 7998  | 0.429 | -1.219745 | 0.288 | 0 |
| chr12 | 11090852  | 11091806  | TAS2R14   | - | 954    | 1.155 | 36    | 18    | 42    | 0.429 | -1.222168 | 0.565 | 0 |
| chr13 | 24144508  | 24250244  | TNFRSF19  | + | 105736 | 1.248 | 4378  | 2189  | 5108  | 0.429 | -1.222173 | 0.261 | 0 |
| chr22 | 20008630  | 20053447  | C2orf25   | + | 44817  | 1.467 | 2091  | 1048  | 2438  | 0.43  | -1.218417 | 0.191 | 0 |
| chr10 | 50723150  | 50725167  | PGBD3     | - | 2017   | 2.953 | 196   | 98    | 229   | 0.43  | -1.218925 | 0.374 | 0 |
| chr15 | 90544751  | 90625432  | ZNF710    | + | 80681  | 1.163 | 3031  | 1518  | 3535  | 0.43  | -1.218653 | 0.218 | 0 |
| chr6  | 100956607 | 101329224 | ASCC3     | - | 372617 | 2.519 | 31268 | 15724 | 36449 | 0.431 | -1.212194 | 0.565 | 0 |
| chr1  | 91380856  | 91487812  | ZNF644    | - | 106956 | 2.838 | 10012 | 5026  | 11674 | 0.431 | -1.215875 | 0.343 | 0 |
| chr11 | 94501507  | 94609918  | ANOT11    | + | 108411 | 2.779 | 9801  | 4934  | 11423 | 0.432 | -1.211128 | 0.331 | 0 |
| chr19 | 48111452  | 48206534  | GLTSCR1   | + | 95082  | 1.657 | 5090  | 2565  | 5932  | 0.432 | -1.209367 | 0.254 | 0 |
| chr14 | 63841354  | 64010079  | PPP2R5E   | - | 168725 | 1.354 | 7575  | 3817  | 8827  | 0.432 | -1.209427 | 0.32  | 0 |
| chr12 | 11126253  | 11324224  | PRH1-PRR4 | - | 197971 | 1.455 | 9562  | 4815  | 11145 | 0.432 | -1.210823 | 0.347 | 0 |
| chr12 | 14518610  | 14651697  | ATF7IP    | + | 133087 | 1.708 | 7587  | 3831  | 8839  | 0.433 | -1.206114 | 0.329 | 0 |
| chr10 | 106071898 | 106093663 | ITPRIP    | - | 21765  | 4.001 | 2772  | 1398  | 3230  | 0.433 | -1.208416 | 0.206 | 0 |
| chr8  | 92967194  | 93115454  | RUNX1T1   | - | 148260 | 1.028 | 5034  | 2539  | 5866  | 0.433 | -1.207936 | 0.276 | 0 |
| chr17 | 76170159  | 76183285  | TK1       | - | 13126  | 2.985 | 1253  | 632   | 1460  | 0.433 | -1.207753 | 0.199 | 0 |
| chr13 | 48877882  | 49056026  | RB1       | + | 178144 | 1.334 | 7807  | 3950  | 9092  | 0.434 | -1.202709 | 0.317 | 0 |
| chr15 | 56382730  | 56535483  | RFX7      | - | 152753 | 1.685 | 8549  | 4318  | 9960  | 0.434 | -1.205691 | 0.338 | 0 |
| chr19 | 16308664  | 16346156  | AP1M1     | + | 37492  | 1.989 | 2364  | 1198  | 2753  | 0.435 | -1.200517 | 0.201 | 0 |
| chr10 | 99894380  | 100004654 | C10orf28  | + | 110274 | 1.502 | 5446  | 2760  | 6342  | 0.435 | -1.20035  | 0.281 | 0 |
| chr5  | 179921416 | 180005353 | CNOT6     | + | 83937  | 1.075 | 2969  | 1504  | 3457  | 0.435 | -1.200493 | 0.242 | 0 |
| chr2  | 158592957 | 158732374 | ACVR1     | - | 139417 | 2.063 | 9374  | 4754  | 10915 | 0.436 | -1.199069 | 0.334 | 0 |
| chr10 | 104503726 | 104576021 | C10orf26  | + | 72295  | 1.033 | 2442  | 1240  | 2843  | 0.436 | -1.197281 | 0.231 | 0 |
| chr11 | 73019662  | 73080425  | ARHGEF17  | + | 60763  | 2.763 | 5426  | 2758  | 6316  | 0.437 | -1.195283 | 0.268 | 0 |
| chr7  | 140433812 | 140624564 | BRAF      | - | 190752 | 1.093 | 6946  | 3529  | 80839 | 0.437 | -1.195839 | 0.323 | 0 |
| chr8  | 27950583  | 28048669  | ELP3      | + | 98086  | 1.033 | 3324  | 1692  | 3868  | 0.437 | -1.192789 | 0.249 | 0 |
| chr1  | 1716724   | 1822526   | GNB1      | - | 105802 | 4.435 | 15380 | 7816  | 17901 | 0.437 | -1.195428 | 0.412 | 0 |
| chr17 | 28443833  | 28513486  | NSRP1     | + | 69653  | 2.364 | 5413  | 2754  | 6299  | 0.437 | -1.193793 | 0.283 | 0 |
| chr3  | 126707436 | 126756235 | PLXNA1    | + | 48799  | 1.057 | 1634  | 831   | 1901  | 0.437 | -1.192858 | 0.197 | 0 |

|       |           |           |                  |   |        |        |       |       |       |       |           |       |   |
|-------|-----------|-----------|------------------|---|--------|--------|-------|-------|-------|-------|-----------|-------|---|
| chr5  | 131630144 | 131679899 | <b>SLC22A4</b>   | + | 49755  | 1.582  | 2524  | 1283  | 2937  | 0.437 | -1.19519  | 0.216 | 0 |
| chr6  | 52128811  | 52149582  | <b>MCM3</b>      | - | 20771  | 1.418  | 957   | 488   | 1113  | 0.438 | -1.189877 | 0.23  | 0 |
| chr1  | 47897806  | 47900313  | <b>MGC12982</b>  | - | 2507   | 1.58   | 124   | 63    | 144   | 0.438 | -1.190149 | 0.388 | 0 |
| chr22 | 36677322  | 36784063  | <b>MYH9</b>      | - | 106741 | 10.452 | 36042 | 18373 | 41931 | 0.438 | -1.19043  | 0.577 | 0 |
| chr2  | 128698790 | 128784869 | <b>SAP130</b>    | - | 86079  | 1.029  | 2879  | 1466  | 3350  | 0.438 | -1.191935 | 0.233 | 0 |
| chr2  | 20400557  | 20425194  | <b>SDC1</b>      | - | 24637  | 1.458  | 1145  | 584   | 1332  | 0.438 | -1.189583 | 0.207 | 0 |
| chr2  | 196521531 | 196602426 | <b>SLC39A10</b>  | + | 80895  | 1.173  | 3105  | 1583  | 3612  | 0.438 | -1.190177 | 0.243 | 0 |
| chr2  | 230631929 | 230786655 | <b>TRIP12</b>    | - | 154726 | 3.104  | 15842 | 8065  | 18434 | 0.438 | -1.192557 | 0.426 | 0 |
| chr12 | 93166284  | 93232107  | <b>EEA1</b>      | - | 156823 | 1.688  | 8748  | 4468  | 10175 | 0.439 | -1.187217 | 0.343 | 0 |
| chr3  | 129033613 | 129035120 | <b>H1FX</b>      | - | 1507   | 7.353  | 345   | 176   | 402   | 0.439 | -1.186444 | 0.277 | 0 |
| chr12 | 31944118  | 31945175  | <b>H3F3C</b>     | - | 1057   | 1.735  | 58    | 30    | 68    | 0.439 | -1.188669 | 0.501 | 0 |
| chr6  | 26027123  | 26027480  | <b>HIST1H4B</b>  | - | 357    | 23.376 | 268   | 137   | 312   | 0.439 | -1.187914 | 0.335 | 0 |
| chr8  | 42128819  | 42190171  | <b>IKBK</b>      | + | 61352  | 1.336  | 2657  | 1356  | 3091  | 0.439 | -1.18871  | 0.229 | 0 |
| chr12 | 53645369  | 53648190  | <b>MFSD5</b>     | + | 2821   | 2.598  | 231   | 118   | 269   | 0.439 | -1.186409 | 0.331 | 0 |
| chr6  | 143929316 | 144152322 | <b>PHACTR2</b>   | + | 223006 | 1.704  | 12649 | 6455  | 14714 | 0.439 | -1.188535 | 0.401 | 0 |
| chr3  | 47057897  | 47205467  | <b>SETD2</b>     | - | 147570 | 2.308  | 11365 | 5803  | 13218 | 0.439 | -1.18747  | 0.387 | 0 |
| chrX  | 123094474 | 123236505 | <b>STAG2</b>     | + | 142031 | 1.468  | 6908  | 3527  | 8035  | 0.439 | -1.187758 | 0.321 | 0 |
| chr8  | 56792385  | 56925006  | <b>LYN</b>       | + | 132621 | 1.275  | 5579  | 2856  | 6487  | 0.44  | -1.183563 | 0.297 | 0 |
| chr3  | 8918879   | 9005159   | <b>RAD18</b>     | - | 86280  | 1.939  | 5606  | 2866  | 6519  | 0.44  | -1.185554 | 0.313 | 0 |
| chr2  | 55199326  | 55277734  | <b>RTN4</b>      | - | 78408  | 11.19  | 28958 | 14825 | 33669 | 0.44  | -1.183381 | 0.553 | 0 |
| chr2  | 47168312  | 47303275  | <b>TTC7A</b>     | + | 134963 | 1.624  | 7155  | 3658  | 8321  | 0.44  | -1.185724 | 0.309 | 0 |
| chr1  | 206858364 | 206907630 | <b>MAPKAPK2</b>  | + | 49266  | 3.695  | 5853  | 3003  | 6803  | 0.441 | -1.179624 | 0.277 | 0 |
| chr7  | 44836240  | 44842716  | <b>PPIA</b>      | + | 6476   | 7.282  | 1523  | 781   | 1770  | 0.441 | -1.179876 | 0.221 | 0 |
| chr18 | 56530060  | 56653709  | <b>ZNF532</b>    | + | 123649 | 2.127  | 8747  | 4481  | 10168 | 0.441 | -1.182134 | 0.354 | 0 |
| chr17 | 65821779  | 65980494  | <b>BPTF</b>      | + | 158715 | 1.517  | 8027  | 4126  | 9327  | 0.442 | -1.176613 | 0.349 | 0 |
| chr7  | 148395932 | 148498202 | <b>CUL1</b>      | + | 102270 | 2.923  | 9783  | 5027  | 11368 | 0.442 | -1.177046 | 0.354 | 0 |
| chr15 | 22892683  | 23003603  | <b>CYFIP1</b>    | + | 110920 | 1.732  | 6198  | 3185  | 7202  | 0.442 | -1.176973 | 0.286 | 0 |
| chr4  | 123091757 | 123283914 | <b>KIAA1109</b>  | + | 192157 | 1.018  | 6509  | 3345  | 7563  | 0.442 | -1.176694 | 0.326 | 0 |
| chr3  | 38207025  | 38296979  | <b>OXS1</b>      | + | 89954  | 3.491  | 10345 | 5313  | 12022 | 0.442 | -1.178076 | 0.367 | 0 |
| chr4  | 139085247 | 139163503 | <b>SLC7A11</b>   | - | 78256  | 1.673  | 4429  | 2276  | 5146  | 0.442 | -1.176916 | 0.309 | 0 |
| chr3  | 105377108 | 105587887 | <b>CBLB</b>      | - | 210779 | 1.274  | 8962  | 4613  | 10412 | 0.443 | -1.174417 | 0.363 | 0 |
| chr19 | 4675243   | 4723855   | <b>DPP9</b>      | - | 48612  | 1.846  | 2866  | 1474  | 3330  | 0.443 | -1.175767 | 0.226 | 0 |
| chr2  | 182321618 | 182402468 | <b>ITGA4</b>     | + | 80850  | 2.109  | 5766  | 2966  | 6699  | 0.443 | -1.175176 | 0.332 | 0 |
| chr11 | 12399025  | 12556903  | <b>PARVA</b>     | + | 157878 | 4.347  | 22549 | 11615 | 26193 | 0.443 | -1.173138 | 0.5   | 0 |
| chr7  | 29959718  | 30029905  | <b>SCRN1</b>     | - | 70187  | 2.993  | 6872  | 3533  | 7985  | 0.443 | -1.176233 | 0.312 | 0 |
| chr8  | 37553300  | 37556396  | <b>ZNF703</b>    | + | 3096   | 4.953  | 469   | 241   | 545   | 0.443 | -1.17368  | 0.235 | 0 |
| chr19 | 41725107  | 41767671  | <b>AXL</b>       | + | 42564  | 7.009  | 9708  | 5004  | 11276 | 0.444 | -1.171937 | 0.349 | 0 |
| chr9  | 99212413  | 99253618  | <b>HABP4</b>     | + | 41205  | 2.007  | 2714  | 1399  | 3152  | 0.444 | -1.171511 | 0.251 | 0 |
| chr8  | 9413444   | 9639856   | <b>TNKS</b>      | + | 226412 | 1.477  | 11047 | 5693  | 12831 | 0.444 | -1.172395 | 0.381 | 0 |
| chr15 | 63334837  | 63364113  | <b>TPM1</b>      | + | 29276  | 19.667 | 19095 | 9840  | 22181 | 0.444 | -1.172557 | 0.476 | 0 |
| chr2  | 61414589  | 61697849  | <b>USP34</b>     | - | 283260 | 1.719  | 16103 | 8308  | 18701 | 0.444 | -1.170497 | 0.444 | 0 |
| chr10 | 62538088  | 62554610  | <b>CDK1</b>      | + | 16522  | 2.966  | 1602  | 827   | 1860  | 0.445 | -1.168298 | 0.237 | 0 |
| chr11 | 61891444  | 61920635  | <b>INCENP</b>    | + | 29191  | 1.46   | 1363  | 705   | 1583  | 0.445 | -1.167333 | 0.218 | 0 |
| chr11 | 119205236 | 119208022 | <b>RNF26</b>     | + | 2786   | 4.525  | 398   | 205   | 462   | 0.445 | -1.168478 | 0.282 | 0 |
| chr8  | 8175257   | 8239257   | <b>SGK223</b>    | - | 64000  | 2.645  | 5734  | 2965  | 6657  | 0.445 | -1.166973 | 0.339 | 0 |
| chr2  | 85360582  | 85537511  | <b>TCF7L1</b>    | + | 176929 | 1.031  | 5937  | 3070  | 6892  | 0.445 | -1.166584 | 0.297 | 0 |
| chr15 | 50849351  | 50979012  | <b>TRPM7</b>     | - | 129661 | 1.811  | 7709  | 3983  | 8952  | 0.445 | -1.168835 | 0.335 | 0 |
| chr1  | 249132529 | 249143714 | <b>ZNF672</b>    | + | 11185  | 1.1    | 391   | 202   | 455   | 0.445 | -1.168998 | 0.293 | 0 |
| chr19 | 1911888   | 1913446   | <b>ADAT3</b>     | + | 1558   | 1.899  | 92    | 48    | 107   | 0.446 | -1.165885 | 0.436 | 0 |
| chr4  | 126237566 | 126414087 | <b>FAT4</b>      | + | 176521 | 1.107  | 6625  | 3433  | 7689  | 0.446 | -1.163293 | 0.356 | 0 |
| chr12 | 115108058 | 115121969 | <b>TBX3</b>      | - | 13911  | 32.554 | 14519 | 7519  | 16852 | 0.446 | -1.164317 | 0.397 | 0 |
| chr4  | 2932287   | 2936586   | <b>MFSD10</b>    | - | 4299   | 1.715  | 231   | 120   | 268   | 0.447 | -1.160299 | 0.338 | 0 |
| chr17 | 79523912  | 79604138  | <b>NPLOC4</b>    | - | 80226  | 3.517  | 9108  | 4728  | 10568 | 0.447 | -1.160366 | 0.339 | 0 |
| chr1  | 223889294 | 223963720 | <b>CAPN2</b>     | + | 74426  | 5.051  | 12227 | 6358  | 14183 | 0.448 | -1.157402 | 0.388 | 0 |
| chr1  | 179923907 | 180084015 | <b>CEP350</b>    | + | 160108 | 1.346  | 7161  | 3719  | 8308  | 0.448 | -1.159447 | 0.342 | 0 |
| chr19 | 42788816  | 42799949  | <b>CIC</b>       | + | 11133  | 1.516  | 533   | 277   | 619   | 0.448 | -1.159898 | 0.26  | 0 |
| chr18 | 2916991   | 3011945   | <b>LPIN2</b>     | - | 94954  | 1.878  | 5813  | 3019  | 6744  | 0.448 | -1.159156 | 0.301 | 0 |
| chr12 | 79985744  | 80084790  | <b>PAWR</b>      | - | 99046  | 2.113  | 7086  | 3689  | 8218  | 0.449 | -1.155308 | 0.365 | 0 |
| chr11 | 8714898   | 8932498   | <b>STS</b>       | - | 217600 | 1.825  | 12930 | 6730  | 14996 | 0.449 | -1.155911 | 0.4   | 0 |
| chr12 | 97301000  | 97347469  | <b>NEDD1</b>     | + | 46469  | 3.396  | 5403  | 2820  | 6264  | 0.45  | -1.151454 | 0.353 | 0 |
| chr3  | 14444105  | 14530857  | <b>SLC6A6</b>    | + | 86752  | 4.018  | 11216 | 5854  | 13003 | 0.45  | -1.151261 | 0.368 | 0 |
| chr20 | 33890368  | 33999945  | <b>UQC</b>       | - | 109577 | 1.275  | 4547  | 2373  | 5271  | 0.45  | -1.151422 | 0.281 | 0 |
| chr7  | 97910978  | 97922275  | <b>BR13</b>      | + | 11297  | 10.444 | 3718  | 1945  | 4309  | 0.451 | -1.147569 | 0.239 | 0 |
| chr11 | 64844926  | 64851615  | <b>CDCA5</b>     | - | 6689   | 2.468  | 527   | 276   | 611   | 0.451 | -1.147806 | 0.279 | 0 |
| chr13 | 41129800  | 41240734  | <b>FOXO1</b>     | - | 110934 | 1.013  | 3816  | 1994  | 4423  | 0.451 | -1.149423 | 0.321 | 0 |
| chr13 | 50018428  | 50069139  | <b>SETDB2</b>    | + | 50711  | 1.114  | 1830  | 956   | 2121  | 0.451 | -1.149428 | 0.24  | 0 |
| chr17 | 411907    | 618096    | <b>VPS53</b>     | - | 206189 | 1.035  | 6930  | 3619  | 8034  | 0.451 | -1.150385 | 0.321 | 0 |
| chr19 | 43671894  | 43690688  | <b>PSG5</b>      | - | 18794  | 3.148  | 1982  | 1038  | 2297  | 0.452 | -1.145269 | 0.279 | 0 |
| chr6  | 27775976  | 27776445  | <b>HIST1H2AI</b> | + | 469    | 1.561  | 24    | 12    | 28    | 0.453 | -1.143054 | 0.665 | 0 |
| chr2  | 20817563  | 20850864  | <b>HS1BP3</b>    | - | 33301  | 1.37   | 1429  | 749   | 1655  | 0.453 | -1.143377 | 0.21  | 0 |
| chr16 | 577855    | 604636    | <b>SOLH</b>      | + | 26781  | 1.003  | 847   | 445   | 981   | 0.453 | -1.141077 | 0.232 | 0 |

|       |           |           |              |   |        |        |       |       |       |       |           |       |   |
|-------|-----------|-----------|--------------|---|--------|--------|-------|-------|-------|-------|-----------|-------|---|
| chr5  | 154092461 | 154197163 | LARP1        | + | 104702 | 1.933  | 6536  | 3436  | 7569  | 0.454 | -1.139075 | 0.315 | 0 |
| chr16 | 88781745  | 88851372  | PIEZO1       | - | 69627  | 2.128  | 4696  | 2470  | 5438  | 0.454 | -1.138548 | 0.266 | 0 |
| chr3  | 149530474 | 149679925 | RNF13        | + | 149451 | 1.261  | 6231  | 3278  | 7215  | 0.454 | -1.137797 | 0.337 | 0 |
| chr14 | 103398715 | 103523742 | CDC42BPB     | - | 125027 | 2.109  | 8512  | 4488  | 9854  | 0.455 | -1.134625 | 0.344 | 0 |
| chr8  | 67474409  | 67525480  | MYBL1        | - | 51071  | 2.014  | 3402  | 1790  | 3939  | 0.455 | -1.137228 | 0.289 | 0 |
| chr9  | 91003296  | 91093622  | SPIN1        | + | 90326  | 2.977  | 8846  | 4659  | 10242 | 0.455 | -1.136236 | 0.369 | 0 |
| chr13 | 33078642  | 33083532  | CGO30        | - | 4890   | 4.1    | 655   | 345   | 758   | 0.456 | -1.133889 | 0.291 | 0 |
| chr13 | 53029494  | 53050763  | CKAP2        | + | 21269  | 3.02   | 2121  | 1119  | 2455  | 0.456 | -1.133712 | 0.274 | 0 |
| chr13 | 32605436  | 32870776  | FRY          | + | 265340 | 1.112  | 9924  | 5242  | 11485 | 0.456 | -1.131532 | 0.412 | 0 |
| chr11 | 27387507  | 27494334  | LGR4         | - | 106827 | 1.289  | 4578  | 2416  | 5299  | 0.456 | -1.13315  | 0.318 | 0 |
| chr1  | 173900351 | 173962210 | SEC3H1       | - | 61859  | 1.821  | 3762  | 1986  | 4354  | 0.456 | -1.132215 | 0.309 | 0 |
| chr18 | 43753987  | 43846955  | C18orf25     | + | 92968  | 1.992  | 6134  | 3242  | 7098  | 0.457 | -1.130681 | 0.339 | 0 |
| chr1  | 180167169 | 180169859 | FLJ23867     | + | 2690   | 1.017  | 87    | 46    | 101   | 0.457 | -1.129082 | 0.487 | 0 |
| chr15 | 41271078  | 41408340  | INO80        | - | 137262 | 1.505  | 6812  | 3600  | 7882  | 0.457 | -1.13047  | 0.345 | 0 |
| chr15 | 48431628  | 48470558  | MYEF2        | - | 38930  | 1.063  | 1361  | 720   | 1574  | 0.457 | -1.128309 | 0.268 | 0 |
| chr3  | 8792094   | 8811300   | OXTR         | - | 19206  | 28.373 | 18022 | 9523  | 20855 | 0.457 | -1.130802 | 0.489 | 0 |
| chr3  | 145787227 | 145879282 | PLOD2        | - | 92055  | 3.263  | 10298 | 5445  | 11916 | 0.457 | -1.129851 | 0.441 | 0 |
| chr8  | 26149006  | 26230195  | PPP2R2A      | + | 81189  | 2.934  | 7840  | 4149  | 9070  | 0.457 | -1.128249 | 0.359 | 0 |
| chr4  | 119643977 | 119757326 | SEC24D       | - | 113349 | 5.52   | 20810 | 10995 | 24082 | 0.457 | -1.131049 | 0.522 | 0 |
| chr9  | 137533651 | 137736688 | COL5A1       | + | 203037 | 2.068  | 13579 | 7189  | 15710 | 0.458 | -1.127815 | 0.415 | 0 |
| chr3  | 33038099  | 33138694  | GLB1         | - | 100595 | 1.056  | 3439  | 1820  | 3979  | 0.458 | -1.127891 | 0.274 | 0 |
| chr13 | 24995068  | 25086948  | PARP4        | - | 91880  | 1.549  | 4622  | 2447  | 5347  | 0.458 | -1.127462 | 0.297 | 0 |
| chr12 | 121200312 | 121342155 | SPPL3        | - | 141843 | 1.166  | 5444  | 2886  | 6296  | 0.458 | -1.12502  | 0.326 | 0 |
| chr8  | 41786996  | 41909505  | KAT6A        | - | 122509 | 1.821  | 7367  | 3913  | 8519  | 0.459 | -1.12224  | 0.359 | 0 |
| chr21 | 26934456  | 26947480  | MIR155HG     | + | 13024  | 4.336  | 1850  | 982   | 2139  | 0.459 | -1.122292 | 0.268 | 0 |
| chr4  | 37592421  | 37687999  | RELL1        | - | 95578  | 1.019  | 3174  | 1683  | 3671  | 0.459 | -1.124604 | 0.277 | 0 |
| chr6  | 10396915  | 10419797  | TFAP2A       | - | 22882  | 13.311 | 9910  | 5261  | 11460 | 0.459 | -1.12326  | 0.379 | 0 |
| chr1  | 210001311 | 210030910 | DIEXF        | + | 29599  | 3.393  | 3258  | 1733  | 3766  | 0.46  | -1.119635 | 0.277 | 0 |
| chr5  | 15500304  | 15939900  | FBXL7        | + | 439596 | 1.755  | 25779 | 13717 | 29800 | 0.46  | -1.119385 | 0.577 | 0 |
| chr12 | 13043955  | 13066600  | GPRC5A       | + | 22645  | 7.299  | 5411  | 2877  | 6255  | 0.46  | -1.120381 | 0.323 | 0 |
| chr1  | 39547088  | 39952810  | MACF1        | + | 405722 | 1.896  | 25461 | 13552 | 29430 | 0.46  | -1.118782 | 0.566 | 0 |
| chr11 | 85668213  | 85780923  | PICALM       | - | 112710 | 4.915  | 18531 | 9863  | 21421 | 0.46  | -1.11888  | 0.515 | 0 |
| chr21 | 45285115  | 45407475  | AGPAT3       | + | 122360 | 1.2    | 4708  | 2507  | 5442  | 0.461 | -1.118206 | 0.287 | 0 |
| chr12 | 105567074 | 105630008 | APPL2        | - | 62934  | 6.758  | 14098 | 7509  | 16294 | 0.461 | -1.117714 | 0.457 | 0 |
| chr2  | 118673053 | 118771739 | CCDC93       | - | 98686  | 1.482  | 4738  | 2525  | 5476  | 0.461 | -1.117045 | 0.301 | 0 |
| chr11 | 47487488  | 47574792  | CELF1        | - | 87304  | 2.995  | 8525  | 4539  | 9853  | 0.461 | -1.11808  | 0.364 | 0 |
| chr20 | 34213952  | 34236846  | CPNE1        | - | 22894  | 2.631  | 1949  | 1038  | 2253  | 0.461 | -1.117539 | 0.258 | 0 |
| chr1  | 156084460 | 156109878 | LMNA         | + | 25418  | 20.635 | 16658 | 8875  | 19252 | 0.461 | -1.117199 | 0.435 | 0 |
| chr4  | 39824482  | 39979576  | PDS5A        | - | 155094 | 1.681  | 8587  | 4572  | 9926  | 0.461 | -1.118302 | 0.377 | 0 |
| chr13 | 33160563  | 33352158  | PDS5B        | + | 191595 | 1.025  | 6548  | 3486  | 7569  | 0.461 | -1.118363 | 0.36  | 0 |
| chr8  | 38854504  | 38962779  | ADAM9        | + | 108275 | 4.923  | 17562 | 9374  | 20292 | 0.462 | -1.114096 | 0.489 | 0 |
| chr2  | 5163929   | 5222601   | ARL8B        | + | 58672  | 3.216  | 6037  | 3224  | 6975  | 0.462 | -1.113005 | 0.31  | 0 |
| chr3  | 32582095  | 32843965  | BIRC6        | + | 261870 | 2.134  | 18580 | 9916  | 21469 | 0.462 | -1.114339 | 0.51  | 0 |
| chr13 | 45006278  | 45150701  | TSC22D1      | - | 144423 | 1.599  | 7579  | 4049  | 8756  | 0.462 | -1.112659 | 0.361 | 0 |
| chr5  | 138940750 | 139008018 | UBE2D2       | + | 67268  | 1.905  | 4220  | 2254  | 4875  | 0.462 | -1.112599 | 0.313 | 0 |
| chr15 | 69096159  | 69099440  | ANP32A-IT1   | - | 3281   | 1.228  | 129   | 69    | 150   | 0.463 | -1.111645 | 0.454 | 0 |
| chr5  | 171288555 | 171433877 | FBXW11       | - | 145322 | 2.07   | 9925  | 5308  | 11464 | 0.463 | -1.110911 | 0.402 | 0 |
| chr10 | 98592016  | 98724198  | LCOR1        | + | 132182 | 2.387  | 10483 | 5604  | 12109 | 0.463 | -1.111586 | 0.417 | 0 |
| chr5  | 52856464  | 52979171  | NDUF54       | + | 122707 | 1.684  | 6827  | 3652  | 7885  | 0.463 | -1.110224 | 0.359 | 0 |
| chr18 | 46446222  | 46477081  | SMAD7        | - | 30859  | 7.905  | 7935  | 4245  | 9165  | 0.463 | -1.110219 | 0.359 | 0 |
| chr7  | 5346422   | 5463177   | TNRC18       | - | 116755 | 1.401  | 5257  | 2811  | 6073  | 0.463 | -1.111085 | 0.304 | 0 |
| chr19 | 39897486  | 39900045  | ZFP36        | + | 2559   | 49.718 | 3955  | 2115  | 4568  | 0.463 | -1.110335 | 0.248 | 0 |
| chr12 | 70636773  | 70748773  | CNOT2        | + | 112000 | 2.624  | 9720  | 5213  | 11223 | 0.464 | -1.106316 | 0.404 | 0 |
| chr10 | 79550548  | 79686348  | DLG5         | - | 135800 | 1.385  | 6071  | 3254  | 7010  | 0.464 | -1.107188 | 0.325 | 0 |
| chr3  | 193853930 | 193856401 | HEI51        | + | 2471   | 3.14   | 241   | 129   | 279   | 0.464 | -1.107588 | 0.35  | 0 |
| chr11 | 3696239   | 3819022   | NUP98        | - | 122783 | 2.371  | 9566  | 5124  | 11047 | 0.464 | -1.108157 | 0.395 | 0 |
| chr3  | 141205925 | 141331197 | RASA2        | + | 125272 | 2.496  | 10259 | 5498  | 11845 | 0.464 | -1.107245 | 0.402 | 0 |
| chr1  | 9294862   | 9331394   | H6PD         | + | 36532  | 1.176  | 1368  | 735   | 1579  | 0.465 | -1.10376  | 0.246 | 0 |
| chr16 | 70557690  | 70611571  | SF3B3        | + | 53881  | 2.491  | 4383  | 2351  | 5060  | 0.465 | -1.105479 | 0.31  | 0 |
| chr12 | 111843751 | 111889427 | SH2B3        | + | 45676  | 3.042  | 4412  | 2368  | 5094  | 0.465 | -1.104647 | 0.279 | 0 |
| chr20 | 37590980  | 37668366  | DHX35        | + | 77386  | 1.312  | 3323  | 1787  | 3835  | 0.466 | -1.101495 | 0.298 | 0 |
| chr2  | 42396489  | 42559688  | EML4         | + | 163199 | 1.079  | 5752  | 3095  | 6638  | 0.466 | -1.100742 | 0.338 | 0 |
| chr7  | 130628918 | 130793562 | FLJ43663     | - | 164644 | 3.208  | 17195 | 9250  | 19844 | 0.466 | -1.101167 | 0.479 | 0 |
| chr1  | 198777131 | 198906558 | LOC100131234 | - | 129427 | 1.748  | 7538  | 4055  | 8699  | 0.466 | -1.101177 | 0.384 | 0 |
| chr13 | 22066827  | 22178355  | EFHA1        | - | 111528 | 1.263  | 4681  | 2524  | 5400  | 0.467 | -1.097161 | 0.34  | 0 |
| chr15 | 52599479  | 52821247  | MYO5A        | - | 221768 | 1.172  | 8575  | 4621  | 9894  | 0.467 | -1.098314 | 0.39  | 0 |
| chr6  | 3077057   | 3115421   | IRPK1        | + | 38364  | 2.177  | 2717  | 1464  | 3134  | 0.467 | -1.098475 | 0.282 | 0 |
| chr16 | 24930711  | 25026675  | ARHGAP17     | - | 95964  | 2.843  | 8893  | 4803  | 10257 | 0.468 | -1.094618 | 0.382 | 0 |
| chr19 | 10982252  | 11033448  | CARM1        | + | 51196  | 1.196  | 1942  | 1048  | 2240  | 0.468 | -1.09581  | 0.247 | 0 |
| chr10 | 74451888  | 74647452  | MCU          | + | 195564 | 1.256  | 8140  | 4397  | 9388  | 0.468 | -1.094207 | 0.392 | 0 |
| chr9  | 136207754 | 136214972 | MED22        | - | 7218   | 1.514  | 346   | 186   | 399   | 0.468 | -1.095356 | 0.341 | 0 |

|       |           |           |                     |   |        |       |       |       |       |       |           |       |   |
|-------|-----------|-----------|---------------------|---|--------|-------|-------|-------|-------|-------|-----------|-------|---|
| chr5  | 38938021  | 39074501  | <b>RICTOR</b>       | - | 136480 | 2.145 | 9658  | 5215  | 11139 | 0.468 | -1.094761 | 0.408 | 0 |
| chr2  | 224839764 | 224904036 | <b>SEZEPINE2</b>    | - | 64272  | 1.39  | 2819  | 1521  | 3252  | 0.468 | -1.095937 | 0.253 | 0 |
| chr17 | 3907738   | 4046253   | <b>ZZEF1</b>        | - | 138515 | 1.378 | 6222  | 3356  | 7178  | 0.468 | -1.096412 | 0.342 | 0 |
| chr12 | 52626953  | 52642709  | <b>KRT7</b>         | + | 15756  | 1.252 | 673   | 364   | 776   | 0.469 | -1.090834 | 0.365 | 0 |
| chr7  | 151163097 | 151217010 | <b>RHEB</b>         | - | 53913  | 3.714 | 6554  | 3547  | 7556  | 0.469 | -1.090974 | 0.356 | 0 |
| chr15 | 68346571  | 68480404  | <b>PIAS1</b>        | + | 133833 | 2.28  | 10100 | 5472  | 11643 | 0.47  | -1.089167 | 0.422 | 0 |
| chr10 | 88516395  | 88684945  | <b>BMPR1A</b>       | + | 168550 | 1.543 | 8657  | 4699  | 9977  | 0.471 | -1.086189 | 0.41  | 0 |
| chr4  | 1205227   | 1242908   | <b>CTBP1</b>        | - | 37681  | 1.975 | 2353  | 1277  | 2712  | 0.471 | -1.086517 | 0.254 | 0 |
| chr7  | 157129709 | 157210133 | <b>DNAJB6</b>       | + | 80424  | 2.877 | 7481  | 4061  | 8621  | 0.471 | -1.0861   | 0.359 | 0 |
| chr11 | 126293395 | 126870766 | <b>KIRREL3</b>      | - | 577371 | 1.67  | 32094 | 17434 | 36980 | 0.471 | -1.084845 | 0.641 | 0 |
| chr5  | 43602790  | 43705668  | <b>NNT</b>          | + | 102878 | 1.091 | 3659  | 1987  | 4217  | 0.471 | -1.085442 | 0.309 | 0 |
| chr1  | 179068461 | 179198819 | <b>ABL2</b>         | - | 130358 | 2.82  | 12016 | 6539  | 13842 | 0.472 | -1.081916 | 0.435 | 0 |
| chr3  | 130569368 | 130735555 | <b>ATP2C1</b>       | + | 166187 | 2.385 | 13193 | 7171  | 15200 | 0.472 | -1.083678 | 0.469 | 0 |
| chr20 | 40031169  | 40247133  | <b>CHD6</b>         | - | 215964 | 1.475 | 10485 | 5698  | 12080 | 0.472 | -1.084045 | 0.424 | 0 |
| chr2  | 241375114 | 241407495 | <b>GPC1</b>         | + | 32381  | 1.516 | 1558  | 847   | 1795  | 0.472 | -1.08324  | 0.254 | 0 |
| chrX  | 48779302  | 48815648  | <b>OTUD5</b>        | - | 36346  | 1.181 | 1380  | 751   | 1590  | 0.472 | -1.081882 | 0.269 | 0 |
| chr12 | 132195634 | 132284282 | <b>SFSWAP</b>       | + | 88648  | 2.087 | 6012  | 3270  | 6926  | 0.472 | -1.082693 | 0.345 | 0 |
| chr3  | 124944512 | 125094198 | <b>ZNF148</b>       | - | 149686 | 2.17  | 10827 | 5887  | 12473 | 0.472 | -1.08327  | 0.443 | 0 |
| chr19 | 926036    | 972803    | <b>ARID3A</b>       | + | 46767  | 1.295 | 1918  | 1044  | 2209  | 0.473 | -1.080558 | 0.255 | 0 |
| chr2  | 153574406 | 153617767 | <b>ARL6IP6</b>      | + | 43361  | 1.193 | 1683  | 916   | 1939  | 0.473 | -1.080673 | 0.282 | 0 |
| chr5  | 52285155  | 52390609  | <b>ITGA2</b>        | + | 105454 | 1.806 | 6247  | 3404  | 7194  | 0.473 | -1.079684 | 0.36  | 0 |
| chr10 | 90973325  | 91011660  | <b>LIPA</b>         | - | 38335  | 2.538 | 3161  | 1723  | 3641  | 0.473 | -1.078634 | 0.301 | 0 |
| chr2  | 128056244 | 128100805 | <b>MAP3K2</b>       | - | 44561  | 1.258 | 1891  | 1030  | 2178  | 0.473 | -1.080608 | 0.329 | 0 |
| chr2  | 162164785 | 162268226 | <b>PSMD14</b>       | + | 103441 | 1.922 | 6553  | 3573  | 7546  | 0.473 | -1.078688 | 0.373 | 0 |
| chr1  | 193091087 | 193223942 | <b>CDC73</b>        | + | 132855 | 2.294 | 10051 | 5488  | 11573 | 0.474 | -1.076326 | 0.425 | 0 |
| chr12 | 122755980 | 122907116 | <b>CLIP1</b>        | - | 151136 | 1.724 | 8586  | 4682  | 9887  | 0.474 | -1.07851  | 0.402 | 0 |
| chr20 | 42740336  | 42816218  | <b>JPH2</b>         | - | 75882  | 1.082 | 1475  | 3114  | 6114  | 0.474 | -1.078183 | 0.309 | 0 |
| chr6  | 86159301  | 86205509  | <b>NT5E</b>         | + | 46208  | 3.958 | 5963  | 3255  | 6865  | 0.474 | -1.076432 | 0.35  | 0 |
| chr11 | 3108345   | 3186582   | <b>OSBPL5</b>       | - | 78237  | 1.037 | 2591  | 1414  | 2983  | 0.474 | -1.077072 | 0.274 | 0 |
| chr5  | 133861797 | 133918918 | <b>PHF15</b>        | + | 57121  | 1.276 | 2315  | 1264  | 2665  | 0.474 | -1.07621  | 0.264 | 0 |
| chr22 | 22273791  | 22307250  | <b>PPM1F</b>        | - | 33459  | 1.2   | 1280  | 699   | 1473  | 0.474 | -1.076263 | 0.264 | 0 |
| chr8  | 61429468  | 61536203  | <b>RAB2A</b>        | + | 106735 | 4.451 | 15683 | 8559  | 18058 | 0.474 | -1.077025 | 0.495 | 0 |
| chr18 | 47901391  | 47920538  | <b>SKA1</b>         | + | 19147  | 1.089 | 678   | 370   | 780   | 0.474 | -1.075557 | 0.319 | 0 |
| chr22 | 26921713  | 26986089  | <b>TPST2</b>        | - | 64376  | 1.497 | 3133  | 1709  | 3608  | 0.474 | -1.078023 | 0.301 | 0 |
| chr21 | 30671219  | 30734217  | <b>BACH1</b>        | + | 62998  | 5.858 | 12148 | 6642  | 13983 | 0.475 | -1.073871 | 0.452 | 0 |
| chr11 | 65543377  | 65547822  | <b>DKFzP761E198</b> | - | 4445   | 3.271 | 457   | 250   | 526   | 0.475 | -1.073134 | 0.319 | 0 |
| chr2  | 68405988  | 68479651  | <b>PPP3R1</b>       | - | 73663  | 3.317 | 8094  | 4429  | 9316  | 0.475 | -1.072787 | 0.404 | 0 |
| chr9  | 2015341   | 2193623   | <b>SMARCA2</b>      | + | 178282 | 1.152 | 6786  | 3712  | 7811  | 0.475 | -1.073423 | 0.38  | 0 |
| chr14 | 31363004  | 31495607  | <b>STRN3</b>        | - | 132603 | 2.029 | 8890  | 4862  | 10233 | 0.475 | -1.073541 | 0.412 | 0 |
| chr15 | 70946892  | 71055850  | <b>UACA</b>         | - | 108958 | 5.137 | 18477 | 10094 | 21272 | 0.475 | -1.075461 | 0.525 | 0 |
| chr2  | 181845111 | 181928150 | <b>UBE2E3</b>       | + | 83039  | 3.56  | 9697  | 5305  | 11161 | 0.475 | -1.072908 | 0.416 | 0 |
| chr2  | 175424301 | 175547627 | <b>WIPF1</b>        | - | 123326 | 1.774 | 7265  | 3971  | 8363  | 0.475 | -1.074525 | 0.394 | 0 |
| chr21 | 43406939  | 43430496  | <b>ZNF295</b>       | - | 23557  | 1.979 | 1494  | 817   | 1720  | 0.475 | -1.073484 | 0.27  | 0 |
| chr7  | 45039344  | 45116069  | <b>CCM2</b>         | + | 76725  | 1.297 | 3215  | 1759  | 3700  | 0.476 | -1.072213 | 0.299 | 0 |
| chr5  | 80715671  | 81047072  | <b>SSBP2</b>        | - | 331401 | 1.162 | 12974 | 7106  | 14930 | 0.476 | -1.071009 | 0.493 | 0 |
| chr7  | 115850546 | 115898837 | <b>TES</b>          | + | 48291  | 2.844 | 4669  | 2558  | 5372  | 0.476 | -1.070387 | 0.383 | 0 |
| chr7  | 98476112  | 98610866  | <b>TRRAP</b>        | + | 134754 | 1.371 | 5993  | 3284  | 6896  | 0.476 | -1.070296 | 0.349 | 0 |
| chrX  | 108884563 | 108976621 | <b>ACSL4</b>        | - | 92058  | 1.855 | 5621  | 3090  | 6464  | 0.478 | -1.06488  | 0.364 | 0 |
| chr17 | 33914281  | 34053436  | <b>AP2B1</b>        | + | 139155 | 1.923 | 8793  | 4837  | 10112 | 0.478 | -1.063823 | 0.41  | 0 |
| chr8  | 142138719 | 142205900 | <b>DENND3</b>       | + | 67181  | 4.05  | 8671  | 4762  | 9973  | 0.478 | -1.066344 | 0.372 | 0 |
| chr12 | 96588206  | 96661606  | <b>ELK3</b>         | + | 73400  | 1.635 | 3925  | 2157  | 4515  | 0.478 | -1.065642 | 0.33  | 0 |
| chr12 | 65563350  | 65642141  | <b>LEM3</b>         | + | 78791  | 1.204 | 3120  | 1715  | 3588  | 0.478 | -1.064969 | 0.324 | 0 |
| chr7  | 100026412 | 100031749 | <b>MEPCE</b>        | + | 5337   | 3.416 | 576   | 317   | 663   | 0.478 | -1.063459 | 0.308 | 0 |
| chr20 | 49126890  | 49201086  | <b>PTPN1</b>        | + | 74196  | 3.241 | 7807  | 4290  | 8979  | 0.478 | -1.065592 | 0.38  | 0 |
| chr1  | 78030189  | 78148343  | <b>ZZZ3</b>         | - | 118154 | 3.389 | 13172 | 7238  | 15150 | 0.478 | -1.065498 | 0.468 | 0 |
| chr5  | 102465256 | 102538909 | <b>PP1P5K2</b>      | + | 73653  | 1.331 | 3242  | 1785  | 3727  | 0.479 | -1.061861 | 0.335 | 0 |
| chr1  | 31404352  | 31538564  | <b>PUM1</b>         | - | 134212 | 2.85  | 12600 | 6935  | 14489 | 0.479 | -1.062951 | 0.466 | 0 |
| chr12 | 3068477   | 3149842   | <b>TEAD4</b>        | + | 81365  | 1.432 | 3758  | 2068  | 4322  | 0.479 | -1.063006 | 0.311 | 0 |
| chr1  | 35734567  | 35887545  | <b>ZMYM4</b>        | + | 152978 | 1.481 | 7454  | 4106  | 8570  | 0.479 | -1.0615   | 0.394 | 0 |
| chr6  | 75794041  | 75915623  | <b>COL12A1</b>      | - | 121582 | 8.97  | 36710 | 20238 | 42200 | 0.48  | -1.060145 | 0.689 | 0 |
| chr3  | 14989235  | 15090780  | <b>NR2C2</b>        | + | 101545 | 1.323 | 4412  | 2433  | 5071  | 0.48  | -1.059591 | 0.345 | 0 |
| chr7  | 155437202 | 155574179 | <b>RBM33</b>        | + | 136977 | 2.329 | 10430 | 5756  | 11987 | 0.48  | -1.058234 | 0.431 | 0 |
| chr7  | 102781716 | 102782850 | <b>RPL19P12</b>     | - | 1134   | 2.555 | 91    | 50    | 105   | 0.48  | -1.059141 | 0.5   | 0 |
| chr1  | 155305051 | 155532324 | <b>ASH1L</b>        | - | 227273 | 1.313 | 9942  | 5494  | 11425 | 0.481 | -1.056248 | 0.45  | 0 |
| chr6  | 56322784  | 56507694  | <b>DST</b>          | - | 184910 | 6.833 | 41902 | 23173 | 48145 | 0.481 | -1.054966 | 0.707 | 0 |
| chr7  | 44421964  | 44530385  | <b>NUDCD3</b>       | + | 108421 | 1.416 | 4951  | 2738  | 5689  | 0.481 | -1.054886 | 0.337 | 0 |
| chr12 | 42719946  | 42842422  | <b>PHLN1</b>        | + | 122476 | 1.323 | 5306  | 2932  | 6097  | 0.481 | -1.056103 | 0.358 | 0 |
| chr17 | 74380689  | 74383941  | <b>SPHK1</b>        | + | 3252   | 8.736 | 891   | 493   | 1024  | 0.481 | -1.055186 | 0.272 | 0 |
| chr12 | 114791734 | 114846247 | <b>TBX5</b>         | - | 54513  | 4.968 | 8882  | 4910  | 10206 | 0.481 | -1.055567 | 0.415 | 0 |
| chr11 | 101981191 | 102104154 | <b>YAP1</b>         | + | 122963 | 3.482 | 14088 | 7792  | 16187 | 0.481 | -1.054799 | 0.486 | 0 |
| chr6  | 53132195  | 53213977  | <b>ELOVL5</b>       | - | 81782  | 3.385 | 8990  | 4976  | 10327 | 0.482 | -1.053399 | 0.406 | 0 |

|       |           |           |                     |   |        |        |       |       |       |       |           |       |   |
|-------|-----------|-----------|---------------------|---|--------|--------|-------|-------|-------|-------|-----------|-------|---|
| chr3  | 194406621 | 194409766 | <b>FAM43A</b>       | + | 3145   | 12.743 | 1243  | 687   | 1428  | 0.482 | -1.054108 | 0.246 | 0 |
| chr9  | 132250938 | 132275965 | <b>LOC100506190</b> | + | 25027  | 1.009  | 808   | 447   | 928   | 0.482 | -1.052867 | 0.301 | 0 |
| chr11 | 74459912  | 74553458  | <b>RNF169</b>       | + | 93546  | 1.593  | 4908  | 2716  | 5639  | 0.482 | -1.053997 | 0.359 | 0 |
| chr1  | 36805224  | 36851485  | <b>STK40</b>        | - | 46261  | 1.633  | 2422  | 1341  | 2782  | 0.482 | -1.052697 | 0.289 | 0 |
| chr3  | 46963219  | 47018270  | <b>CCDC12</b>       | - | 55051  | 2.955  | 5249  | 2910  | 6029  | 0.483 | -1.050909 | 0.343 | 0 |
| chr2  | 31456879  | 31491260  | <b>EHD3</b>         | + | 34381  | 1.032  | 1123  | 623   | 1290  | 0.483 | -1.04942  | 0.275 | 0 |
| chr8  | 143738873 | 143751401 | <b>JRK</b>          | - | 12528  | 3.168  | 1256  | 697   | 1443  | 0.483 | -1.049668 | 0.272 | 0 |
| chr9  | 127420714 | 127460907 | <b>MIR181A2HG</b>   | + | 40193  | 2.899  | 3946  | 2187  | 4533  | 0.483 | -1.050896 | 0.38  | 0 |
| chr17 | 17714662  | 17740325  | <b>SREBF1</b>       | - | 25663  | 3.095  | 2492  | 1382  | 2862  | 0.483 | -1.049688 | 0.269 | 0 |
| chr6  | 37225547  | 37300746  | <b>TBC1D22B</b>     | + | 75199  | 1.126  | 2778  | 1541  | 3191  | 0.483 | -1.050082 | 0.325 | 0 |
| chr10 | 75757871  | 75879914  | <b>VCL</b>          | + | 122043 | 5.991  | 24062 | 13342 | 27636 | 0.483 | -1.050555 | 0.583 | 0 |
| chr8  | 54628114  | 54755850  | <b>ATP6V1H</b>      | - | 127736 | 1.669  | 6908  | 3839  | 7931  | 0.484 | -1.04685  | 0.376 | 0 |
| chr2  | 149402559 | 149545136 | <b>EPC2</b>         | + | 142577 | 1.94   | 9067  | 5039  | 10410 | 0.484 | -1.046545 | 0.423 | 0 |
| chr18 | 9546791   | 9614600   | <b>PPP4R1</b>       | - | 67809  | 3.377  | 7539  | 4187  | 8656  | 0.484 | -1.047754 | 0.404 | 0 |
| chr1  | 167905796 | 168045833 | <b>DCAF6</b>        | + | 139287 | 1.993  | 9246  | 5148  | 10612 | 0.485 | -1.043467 | 0.448 | 0 |
| chr1  | 184760165 | 184943682 | <b>FAM129A</b>      | - | 183517 | 2.36   | 14383 | 8004  | 16510 | 0.485 | -1.044432 | 0.507 | 0 |
| chr5  | 147763545 | 147822399 | <b>FBXO38</b>       | + | 58854  | 2.042  | 3949  | 2198  | 4533  | 0.485 | -1.044336 | 0.347 | 0 |
| chr1  | 182992594 | 183114727 | <b>LAMC1</b>        | + | 122133 | 4.967  | 19924 | 11096 | 22867 | 0.485 | -1.043164 | 0.552 | 0 |
| chr10 | 89623194  | 89728532  | <b>PTEN</b>         | + | 105338 | 3.437  | 11999 | 6679  | 13772 | 0.485 | -1.043925 | 0.475 | 0 |
| chr4  | 106067031 | 106200960 | <b>TET2</b>         | + | 133929 | 1.341  | 5980  | 3329  | 6864  | 0.485 | -1.04385  | 0.398 | 0 |
| chr9  | 111777414 | 111882225 | <b>C9orf5</b>       | - | 104811 | 1.872  | 6446  | 3594  | 7396  | 0.486 | -1.041054 | 0.388 | 0 |
| chr6  | 27858092  | 27858570  | <b>HIST1H3J</b>     | - | 478    | 3.627  | 55    | 30    | 63    | 0.486 | -1.041598 | 0.595 | 0 |
| chr2  | 11886739  | 11967533  | <b>LPIN1</b>        | + | 80794  | 1.57   | 4041  | 2253  | 4637  | 0.486 | -1.04152  | 0.315 | 0 |
| chr5  | 71403117  | 71505397  | <b>MAP1B</b>        | + | 102280 | 6.247  | 21075 | 11755 | 24182 | 0.486 | -1.040625 | 0.571 | 0 |
| chr4  | 120133781 | 120216673 | <b>USP53</b>        | + | 82892  | 7.478  | 20440 | 11390 | 23457 | 0.486 | -1.042251 | 0.563 | 0 |
| chr2  | 238232654 | 238322850 | <b>COL6A3</b>       | - | 90196  | 10.679 | 30622 | 17114 | 35125 | 0.487 | -1.037296 | 0.605 | 0 |
| chr3  | 155588324 | 155655520 | <b>GMP63</b>        | + | 67196  | 1.805  | 3969  | 2217  | 4552  | 0.487 | -1.037506 | 0.347 | 0 |
| chr9  | 6413150   | 6507051   | <b>UHRF2</b>        | + | 93901  | 2.231  | 6899  | 3855  | 7914  | 0.487 | -1.037693 | 0.402 | 0 |
| chr11 | 58346586  | 58389023  | <b>ZFP91</b>        | + | 42437  | 5.099  | 7041  | 3935  | 8076  | 0.487 | -1.037335 | 0.389 | 0 |
| chr6  | 106632351 | 106773695 | <b>ATG5</b>         | - | 141344 | 1.618  | 7588  | 4249  | 8701  | 0.488 | -1.033825 | 0.425 | 0 |
| chr15 | 91073197  | 91188577  | <b>CRTC3</b>        | + | 115380 | 1.379  | 5206  | 2916  | 5969  | 0.488 | -1.033644 | 0.369 | 0 |
| chr2  | 233562014 | 233725289 | <b>GIGYF2</b>       | + | 163275 | 1.633  | 8745  | 4893  | 10030 | 0.488 | -1.035523 | 0.426 | 0 |
| chr3  | 172348434 | 172429008 | <b>NCEH1</b>        | - | 80574  | 2.729  | 7146  | 3999  | 8195  | 0.488 | -1.035087 | 0.391 | 0 |
| chr16 | 50186828  | 50269219  | <b>PAPD5</b>        | + | 82391  | 1.597  | 4331  | 2424  | 4967  | 0.488 | -1.034727 | 0.36  | 0 |
| chr16 | 53088944  | 53361414  | <b>CHD9</b>         | + | 272470 | 1.827  | 16405 | 9204  | 18805 | 0.489 | -1.030729 | 0.53  | 0 |
| chr8  | 105501458 | 105601252 | <b>LRP12</b>        | - | 99794  | 1.885  | 6164  | 3459  | 7066  | 0.489 | -1.03064  | 0.388 | 0 |
| chr11 | 65837823  | 66012218  | <b>PACS1</b>        | + | 174395 | 1.204  | 6905  | 3870  | 7917  | 0.489 | -1.032456 | 0.404 | 0 |
| chr5  | 102201526 | 102366808 | <b>PAM</b>          | + | 165282 | 3.369  | 18507 | 10374 | 21219 | 0.489 | -1.032302 | 0.561 | 0 |
| chr9  | 127115743 | 127117573 | <b>PSMB7</b>        | - | 61978  | 3.512  | 7042  | 3946  | 8074  | 0.489 | -1.032938 | 0.384 | 0 |
| chr2  | 17845078  | 17935096  | <b>SMC6</b>         | - | 90018  | 1.055  | 3125  | 1753  | 3582  | 0.489 | -1.031177 | 0.345 | 0 |
| chr13 | 27131839  | 27263082  | <b>WASF3</b>        | + | 131243 | 1.002  | 4315  | 2418  | 4947  | 0.489 | -1.032622 | 0.358 | 0 |
| chr4  | 99799606  | 99851786  | <b>EIF4E</b>        | - | 52180  | 2.495  | 4268  | 2397  | 4892  | 0.49  | -1.029172 | 0.359 | 0 |
| chr14 | 31028328  | 31089046  | <b>G2E3</b>         | + | 60718  | 2.654  | 5296  | 2977  | 6069  | 0.49  | -1.027699 | 0.38  | 0 |
| chr4  | 3076407   | 3245687   | <b>HTT</b>          | + | 169280 | 1.227  | 6783  | 3808  | 7775  | 0.49  | -1.02955  | 0.395 | 0 |
| chr2  | 32092893  | 32235698  | <b>MEMO1</b>        | - | 142805 | 1.569  | 7393  | 4152  | 8473  | 0.49  | -1.028844 | 0.418 | 0 |
| chr8  | 103264501 | 103424917 | <b>UBR5</b>         | - | 160416 | 2.662  | 14167 | 7966  | 16234 | 0.491 | -1.027113 | 0.516 | 0 |
| chr7  | 149244244 | 149321881 | <b>ZNF767</b>       | - | 77637  | 1.426  | 3573  | 2010  | 4094  | 0.491 | -1.026281 | 0.333 | 0 |
| chr2  | 239335625 | 239360891 | <b>ASB1</b>         | + | 25266  | 3.835  | 3107  | 1749  | 3559  | 0.492 | -1.024569 | 0.318 | 0 |
| chr18 | 77439800  | 77514510  | <b>CTDP1</b>        | + | 74710  | 1.122  | 2679  | 1510  | 3069  | 0.492 | -1.022874 | 0.308 | 0 |
| chr10 | 104847773 | 104953063 | <b>NT5C2</b>        | - | 105290 | 2.859  | 10045 | 5659  | 11507 | 0.492 | -1.023765 | 0.473 | 0 |
| chr11 | 59522531  | 59573355  | <b>STX3</b>         | + | 50824  | 3.588  | 5800  | 3266  | 6645  | 0.492 | -1.024711 | 0.35  | 0 |
| chr5  | 68462836  | 68474070  | <b>CCNB1</b>        | + | 11234  | 3.98   | 1460  | 824   | 1672  | 0.493 | -1.020701 | 0.325 | 0 |
| chr10 | 76586378  | 76792639  | <b>KAT6B</b>        | + | 206261 | 1.732  | 11890 | 6714  | 13616 | 0.493 | -1.01988  | 0.498 | 0 |
| chr2  | 178257470 | 178408564 | <b>AGPS</b>         | + | 151094 | 1.059  | 5323  | 3011  | 6094  | 0.494 | -1.017189 | 0.402 | 0 |
| chr15 | 77713242  | 77777945  | <b>HMG20A</b>       | + | 64703  | 1.155  | 2482  | 1404  | 2842  | 0.494 | -1.016571 | 0.356 | 0 |
| chr1  | 35899090  | 36023037  | <b>KIAA0319L</b>    | - | 123947 | 1.028  | 4179  | 2362  | 4784  | 0.494 | -1.018381 | 0.365 | 0 |
| chr9  | 5629118   | 5776556   | <b>KIAA1432</b>     | + | 147438 | 3.036  | 14952 | 8451  | 17119 | 0.494 | -1.018306 | 0.539 | 0 |
| chr5  | 6714717   | 6757161   | <b>PAPD7</b>        | + | 42444  | 3.315  | 4512  | 2549  | 5166  | 0.494 | -1.018686 | 0.342 | 0 |
| chr7  | 66205642  | 66276448  | <b>RABGEF1</b>      | + | 70806  | 2.504  | 5769  | 3262  | 6604  | 0.494 | -1.017414 | 0.38  | 0 |
| chr14 | 99864082  | 99947226  | <b>SETD3</b>        | - | 83144  | 1.018  | 2759  | 1560  | 3158  | 0.494 | -1.016872 | 0.337 | 0 |
| chr4  | 10075962  | 10118573  | <b>WDR1</b>         | - | 42611  | 11.654 | 15892 | 8991  | 18192 | 0.494 | -1.016792 | 0.497 | 0 |
| chr18 | 9136750   | 9285983   | <b>ANKRD12</b>      | + | 149233 | 3.016  | 14773 | 8371  | 16907 | 0.495 | -1.014141 | 0.517 | 0 |
| chr1  | 220321609 | 220445843 | <b>RAB3GAP2</b>     | - | 124234 | 1.657  | 6758  | 3830  | 7734  | 0.495 | -1.013783 | 0.412 | 0 |
| chr10 | 102106771 | 102124588 | <b>SCD</b>          | + | 17817  | 3.932  | 2165  | 1227  | 2478  | 0.495 | -1.013749 | 0.269 | 0 |
| chr14 | 103243815 | 103377837 | <b>TRAF3</b>        | + | 134022 | 1.038  | 4530  | 2567  | 5185  | 0.495 | -1.013808 | 0.365 | 0 |
| chr9  | 139971952 | 139978990 | <b>UAP1L1</b>       | + | 7038   | 4.656  | 1022  | 578   | 1170  | 0.495 | -1.015284 | 0.279 | 0 |
| chr12 | 19592607  | 19675173  | <b>AEBP2</b>        | + | 82566  | 1.356  | 3677  | 2086  | 4207  | 0.496 | -1.011662 | 0.362 | 0 |
| chr6  | 170615843 | 170714237 | <b>FAM120B</b>      | + | 98394  | 2.011  | 6421  | 3642  | 7347  | 0.496 | -1.012322 | 0.391 | 0 |
| chr14 | 73741917  | 73925286  | <b>NUMB</b>         | - | 183369 | 1.378  | 8303  | 4713  | 9500  | 0.496 | -1.011298 | 0.436 | 0 |
| chr13 | 111293756 | 111358480 | <b>CARS2</b>        | - | 64724  | 2.792  | 5745  | 3267  | 6570  | 0.497 | -1.007743 | 0.359 | 0 |
| chr2  | 135809834 | 135928279 | <b>RAB3GAP1</b>     | + | 118445 | 2.759  | 10830 | 6159  | 12387 | 0.497 | -1.007892 | 0.486 | 0 |

|                     |           |           |                |   |                |       |       |       |       |       |           |       |   |
|---------------------|-----------|-----------|----------------|---|----------------|-------|-------|-------|-------|-------|-----------|-------|---|
| chr22               | 22311402  | 22337147  | <b>TOP3B</b>   | - | 25745          | 1.35  | 1102  | 626   | 1261  | 0.497 | -1.008646 | 0.301 | 0 |
| chr17               | 76792964  | 76836969  | <b>USP36</b>   | - | 44005          | 3.898 | 5470  | 3109  | 6258  | 0.497 | -1.009236 | 0.358 | 0 |
| chr6                | 87865268  | 87973406  | <b>ZNF292</b>  | + | 108138         | 2.642 | 9368  | 5327  | 10714 | 0.497 | -1.007948 | 0.454 | 0 |
| chr17               | 80200536  | 80231594  | <b>CSNK1D</b>  | - | 31058          | 6.309 | 6279  | 3574  | 7181  | 0.498 | -1.006364 | 0.379 | 0 |
| chr19               | 3506294   | 3536755   | <b>FZR1</b>    | + | 30461          | 2.05  | 1973  | 1123  | 2256  | 0.498 | -1.005857 | 0.296 | 0 |
| chr5                | 65018022  | 65125111  | <b>NLN</b>     | + | 107089         | 1.101 | 3926  | 2236  | 4489  | 0.498 | -1.005054 | 0.388 | 0 |
| chr9                | 77703397  | 77762114  | <b>OSTF1</b>   | + | 58717          | 1.057 | 2024  | 1153  | 2314  | 0.498 | -1.004562 | 0.337 | 0 |
| chr11               | 82692477  | 82782884  | <b>RAB30</b>   | - | 90407          | 1.364 | 4056  | 2309  | 4639  | 0.498 | -1.006187 | 0.375 | 0 |
| chr2                | 114647536 | 114716167 | <b>ACTR3</b>   | + | 68631          | 9.867 | 22389 | 12773 | 25595 | 0.499 | -1.002711 | 0.606 | 0 |
| chr1                | 200708685 | 200829831 | <b>CAMSAP2</b> | + | 121146         | 2     | 8005  | 4569  | 9151  | 0.499 | -1.001823 | 0.447 | 0 |
| chr11               | 120894802 | 120960354 | <b>TBCEL</b>   | + | 65552          | 1.162 | 2493  | 1422  | 2850  | 0.499 | -1.002441 | 0.347 | 0 |
| chr9                | 125703287 | 125867147 | <b>RABGAP1</b> | + | 163860         | 1.383 | 7448  | 4259  | 8511  | 0.5   | -0.998771 | 0.434 | 0 |
| chr1                | 112162404 | 112256101 | <b>RAP1A</b>   | + | 93697          | 2.66  | 8210  | 4693  | 9382  | 0.5   | -0.999415 | 0.448 | 0 |
| <b>sum</b>          |           |           |                |   | <b>1.6E+08</b> |       |       |       |       |       |           |       |   |
| <b>average size</b> |           |           |                |   | <b>136355</b>  |       |       |       |       |       |           |       |   |
